# Supplementary material for: Facile one-pot synthesis of novel imidates as multifunctional organic fluorescent materials
Source: Royal Society of Chemistry journal article supplement (doi:10.1039/d4qo01628a), 2024-11-01

## Supplementary Information

### **Facile one-pot synthesis of novel imidates as multifunctional organic fluorescent materials**

Feng-Ting Liu<sup>a</sup>, Shuo Wang<sup>b</sup>, Yong-Shun Chen<sup>a</sup>, Jun-Ying Miao<sup>b</sup>, Bao-Xiang Zhao<sup>a\*</sup>,  
Zhao-Min Lin<sup>c\*</sup>

*<sup>a</sup>Institute of Organic Chemistry, School of Chemistry and Chemical Engineering,  
Shandong University, Jinan 250100, P.R. China.*

*<sup>b</sup>Shandong Provincial Key Laboratory of Animal Cells and Developmental  
Biology, School of Life Science, Shandong University, Qingdao 266237, P.R. China.*

*<sup>c</sup>Institute of Medical Sciences, the Second Hospital of Shandong University, Jinan  
250033, P.R. China.*

\*Corresponding author

## General remarks

Proton ( $^1\text{H}$ ) and carbon ( $^{13}\text{C}$ ) NMR spectra were determined by Bruker Avance III HD 400 MHz spectrometer. High resolution mass spectrometry was obtained with a Bruker Impact II mass instrument under the conditions of electrospray ionization (ESI) in positive mode. Melting points were determined on a XD-4 digital micro melting point apparatus. IR spectra were obtained using IR spectrophotometer VERTEX 70 FT-IR (Bruker Optics). UV-vis absorption spectra were obtained by a U-4100 spectrophotometer (Hitachi) and fluorescence spectra were measured on a LS-55 fluorescence spectrophotometer (PerkinElmer). The absolute fluorescence quantum yield was measured on an Edinburgh Instruments FLS920 Fluorescence Spectrometer. For single-crystal X-ray diffraction, intensity data and cell parameters were recorded at 293 K on a Bruker Apex II single crystal diffractometer employing  $\text{Cu K}\alpha$  ( $\lambda = 1.54184 \text{ \AA}$ ) and a CCD area detector. Thin-layer chromatography (TLC) was conducted on silica gel 60F<sub>254</sub> plates (Merck KGaA) and column chromatography was carried out over silica gel (200-300 mesh). Unless otherwise stated, all reagents and solvents were purchased from commercial provider. Twice-distilled water was used throughout all experiments.

**Photophysical Characterization of the Compounds.** The stock solutions of compound **4a**, **4j**, **4k**, **4m**, **4n**, **4p**, **4q**, **4u**, **4ad** and **4al** ( $4 \times 10^{-3} \text{ M}$ ) in dimethyl sulfoxide were prepared. The diluted solutions ( $2 \times 10^{-5} \text{ M}$ ) in dimethyl sulfoxide, acetonitrile, ethyl alcohol, acetone, tetrahydrofuran and dichloromethane, respectively, were used for fluorescence measurements. Test solutions ( $4 \times 10^{-5} \text{ M}$ ) in dimethyl sulfoxide, acetonitrile, ethyl alcohol, acetone, tetrahydrofuran and dichloromethane, respectively, were made for UV-vis spectra.

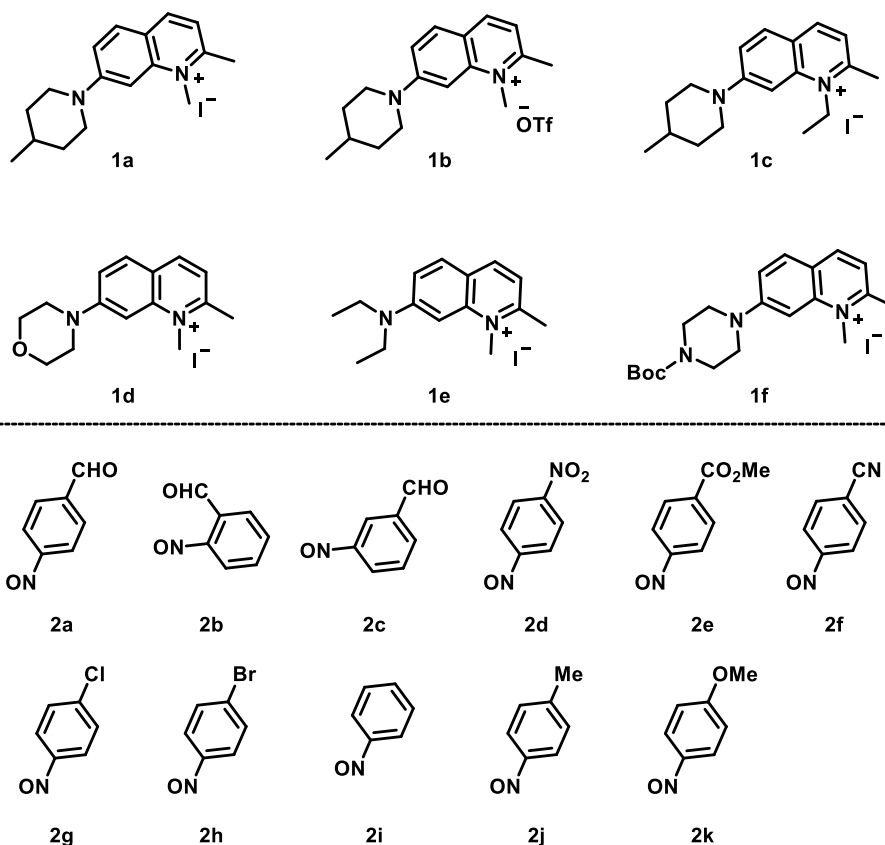

**Materials and Methods.** Quinolinium salt substrates **1a** and **1e** were prepared according to literature procedures<sup>1, 2</sup>. **1b**, **1c**, **1d** and **1f** were synthesized by the following method. Nitrosoarene substrates **2a-c**, **2e-h** and **2k** were prepared according to literature procedures<sup>3</sup>. **2d**, **2i** and **2j** were synthesized by the following method.

#### General procedure for the synthesis of quinolinium salts

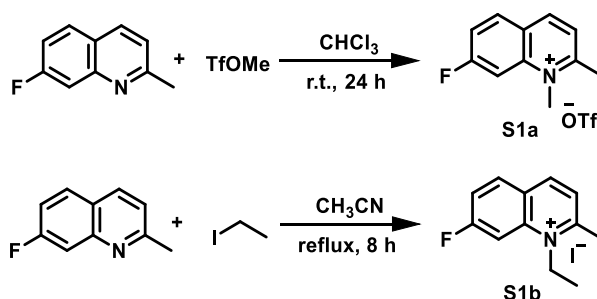

7-Fluoro-2-methylquinoline (1.61 g, 10 mmol) and methyl trifluoromethanesulfonate (4.14 mL, 40 mmol) were added to 20 mL of chloroform. The mixture was stirred at room temperature for 24 h. Afterward, the solvent was removed under reduced pressure, and 20 mL of ether was added to precipitate the desired product **S1a** as a yellow solid. The resulting crude residue was used directly for

the next step.

A 100 mL pressure tubing was charged with 7-fluoro-2-methylquinoline (1.61 g, 10 mmol), iodoethane (7.80 g, 50 mmol) and acetonitrile (20 mL). After the reaction was carried out at 85 °C for 8 h, the generated yellow solid was collected by filtration and washed with acetonitrile (10 mL) to obtain **S1b**. The resulting crude residues were used directly for the next step.

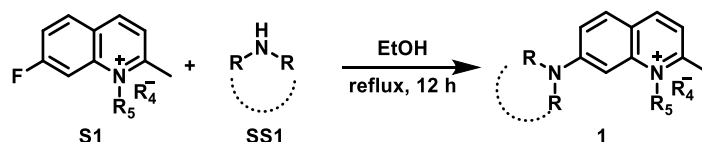

Compound **S1** (10 mmol) and **SS1** (22 mmol) were added into EtOH (40 mL). The mixture was refluxed for 12 h. Then, the mixture solution was concentrated under reduced pressure. The residue was recrystallized with Et<sub>2</sub>O/DCM to obtain compound **1**.

### General procedure for preparations of nitrosoarenes

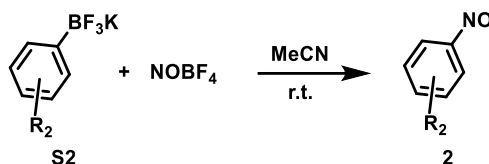

Compound **2** was synthesized according to the reported method<sup>3</sup>. Potassium organotrifluoroborate **S2** (10 mmol) was dissolved in CH<sub>3</sub>CN (100 mL) and NOBF<sub>4</sub> (1.2 g, 10.3 mmol) was added. The reaction was stirred open to air at room temperature until the reaction became homogeneous. The reaction mixture changed from a white slurry to a green or black solution. The crude mixture was added H<sub>2</sub>O (100 mL) and CH<sub>2</sub>Cl<sub>2</sub> (100 mL). The layers were separated, and the aqueous layer was extracted with DCM. The combined organic layers were dried over Na<sub>2</sub>SO<sub>4</sub>, filtered, and concentrated under reduced pressure.

### Analysis data of starting materials

#### 1. 7-fluoro-1,2-dimethylquinolin-1-ium trifluoromethanesulfonate (**S1a**)

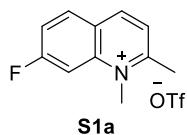

Yellow solid, m.p. = 142-144 °C;  $R_f = 0.2$  ( $\text{CH}_2\text{Cl}_2:\text{CH}_3\text{OH} = 10:1$ ); IR (KBr,  $\text{cm}^{-1}$ ): 3083.50, 1606.56, 1522.07, 1440.95, 1388.57, 1266.90, 1151.99, 1030.32, 866.40, 634.89, 513.22.  $^1\text{H}$  NMR (400 MHz,  $\text{DMSO}-d_6$ )  $\delta$  9.11 (d,  $J = 8.4$  Hz, 1H), 8.56 – 8.50 (m, 2H), 8.10 (d,  $J = 8.5$  Hz, 1H), 8.00-7.93 (m, 1H), 4.40 (s, 3H), 3.07 (s, 3H).  $^{13}\text{C}$  NMR (101 MHz,  $\text{DMSO}-d_6$ )  $\delta$  166.9, 164.4, 162.6, 145.8, 141.3 (d,  $J_{\text{C-F}} = 50.7$  Hz), 134.1 (d,  $J_{\text{C-F}} = 43.3$  Hz), 125.0 (d,  $J_{\text{C-F}} = 9.0$  Hz), 122.7, 119.6 (d,  $J_{\text{C-F}} = 99.4$  Hz), 105.8 (d,  $J_{\text{C-F}} = 111.4$  Hz), 105.7, 40.5, 23.5.  $^{19}\text{F}$  NMR (376 MHz,  $\text{DMSO}-d_6$ ):  $\delta$  -77.76 (s), -98.67 (s). HRMS (ESI)  $m/z$  calcd for  $[\text{C}_{11}\text{H}_{11}\text{FN}]^+ [\text{M-OTf}]^+$ : 176.0870, found 176.0873.

## 2. 1-ethyl-7-fluoro-2-methylquinolin-1-ium iodide (S1b)

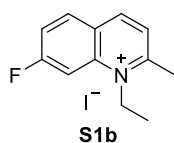

Yellow solid, m.p. = 210-212 °C;  $R_f = 0.2$  ( $\text{CH}_2\text{Cl}_2:\text{CH}_3\text{OH} = 10:1$ ); IR (KBr,  $\text{cm}^{-1}$ ): 3447.42, 3031.71, 1603.78, 1526.04, 1353.68, 1218.49, 1140.76, 870.38.  $^1\text{H}$  NMR (400 MHz,  $\text{DMSO}-d_6$ )  $\delta$  9.14 (d,  $J = 8.4$  Hz, 1H), 8.60 – 8.53 (m, 2H), 8.13 (d,  $J = 8.5$  Hz, 1H), 8.02-7.95 (m, 1H), 4.97 (q,  $J = 7.2$  Hz, 2H), 3.12 (s, 3H), 1.51 (t,  $J = 7.3$  Hz, 3H).  $^{13}\text{C}$  NMR (101 MHz,  $\text{DMSO}-d_6$ )  $\delta$  167.3, 164.7, 161.9, 146.0, 140.1 (d,  $J_{\text{C-F}} = 51$  Hz), 134.4 (d,  $J_{\text{C-F}} = 44$  Hz), 125.5 (d,  $J_{\text{C-F}} = 9.0$  Hz), 119.7 (d,  $J_{\text{C-F}} = 99.6$  Hz), 105.6 (d,  $J_{\text{C-F}} = 112.0$  Hz), 48.1, 22.9, 13.7.  $^{19}\text{F}$  NMR (376 MHz,  $\text{DMSO}-d_6$ ):  $\delta$  -98.51 (s). HRMS (ESI)  $m/z$  calcd for  $[\text{C}_{12}\text{H}_{13}\text{FN}]^+ [\text{M-I}]^+$ : 190.1027, found 190.1033.

## 3. 1,2-dimethyl-7-(4-methylpiperidin-1-yl)quinolin-1-ium trifluoromethanesulfonate (1b)

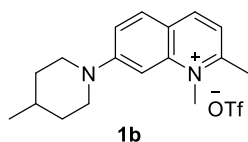

Yellow solid, m.p. = 195-197 °C;  $R_f = 0.2$  ( $\text{CH}_2\text{Cl}_2:\text{CH}_3\text{OH} = 10:1$ ); IR (KBr,  $\text{cm}^{-1}$ ): 2924.65, 1631.91, 1579.52, 1268.59, 1228.03, 1151.99, 1028.63, 842.74, 634.89.  $^1\text{H}$  NMR (400 MHz,  $\text{DMSO}-d_6$ )  $\delta$  8.60 (d,  $J = 7.9$  Hz, 1H), 8.03 (d,  $J = 9.6$  Hz, 1H), 7.71 (d,  $J = 9.2$  Hz, 1H), 7.51 (d,  $J = 8.0$  Hz, 1H), 7.16 (s, 1H), 4.30 (d,  $J = 13.3$  Hz, 2H), 4.18 (s, 3H), 3.11 (t,  $J = 12.5$  Hz, 2H), 2.90 (s, 3H), 1.84 – 1.71 (m, 3H), 1.26 – 1.12 (m, 2H), 0.95 (d,  $J = 6.2$  Hz, 3H).  $^{13}\text{C}$  NMR (101 MHz,  $\text{DMSO}-d_6$ )  $\delta$  157.8, 154.7, 143.4, 143.0, 132.1, 122.8,

121.6, 119.6, 119.0 (d,  $J_{C-F} = 77.6$  Hz), 96.3, 47.7, 39.0, 33.8, 30.7, 23.0, 22.0.  $^{19}\text{F}$  NMR (376 MHz,  $\text{DMSO-}d_6$ ):  $\delta$  -77.74 (s). HRMS (ESI)  $m/z$  calcd for  $[\text{C}_{17}\text{H}_{23}\text{N}_2]^+$   $[\text{M-OTf}]^+$ : 255.1856, found 255.1864.

#### 4. 1-ethyl-2-methyl-7-(4-methylpiperidin-1-yl)quinolin-1-ium iodide (1c)

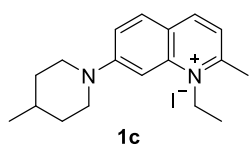

Yellow solid, m.p. = 270-272 °C;  $R_f = 0.2$  ( $\text{CH}_2\text{Cl}_2:\text{CH}_3\text{OH} = 10:1$ ); IR (KBr,  $\text{cm}^{-1}$ ): 2929.57, 1629.47, 1572.39, 1518.48, 1407.50, 1313.96, 1226.75, 1134.80, 1082.48, 958.81, 855.75.  $^1\text{H}$  NMR (400 MHz,  $\text{DMSO-}d_6$ )  $\delta$  8.63 (d,  $J = 8.0$  Hz, 1H), 8.06 (d,  $J = 9.4$  Hz, 1H), 7.73 (dd,  $J = 9.4, 2.1$  Hz, 1H), 7.54 (d,  $J = 8.1$  Hz, 1H), 7.17 (d,  $J = 2.3$  Hz, 1H), 4.81 (q,  $J = 7.2$  Hz, 2H), 4.31 (d,  $J = 13.4$  Hz, 2H), 3.13 (t,  $J = 12.8$  Hz, 2H), 2.94 (s, 3H), 1.83 – 1.73 (m, 3H), 1.46 (t,  $J = 7.1$  Hz, 3H), 1.25 – 1.13 (m, 2H), 0.95 (d,  $J = 6.2$  Hz, 3H).  $^{13}\text{C}$  NMR (101 MHz,  $\text{DMSO-}d_6$ )  $\delta$  157.3, 154.9, 143.7, 141.8, 132.3, 122.0, 119.4, 119.3, 96.0, 47.8, 46.0, 33.8, 30.8, 22.3, 22.0, 13.0. HRMS (ESI)  $m/z$  calcd for  $[\text{C}_{18}\text{H}_{25}\text{N}_2]^+$   $[\text{M-I}]^+$ : 269.2012, found 269.2013.

#### 5. 1,2-dimethyl-7-morpholinoquinolin-1-ium iodide (1d)

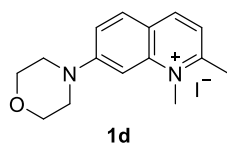

Yellow solid, m.p. = 145-147 °C;  $R_f = 0.2$  ( $\text{CH}_2\text{Cl}_2:\text{CH}_3\text{OH} = 10:1$ ); IR (KBr,  $\text{cm}^{-1}$ ): 3532.45, 2948.68, 1630.57, 1569.81, 1234.34, 1118.11, 859.25, 608.30.  $^1\text{H}$  NMR (400 MHz,  $\text{DMSO-}d_6$ )  $\delta$  8.70 (d,  $J = 8.1$  Hz, 1H), 8.12 (d,  $J = 9.3$  Hz, 1H), 7.74 (dd,  $J = 9.3, 2.2$  Hz, 1H), 7.62 (d,  $J = 8.1$  Hz, 1H), 7.25 (d,  $J = 2.3$  Hz, 1H), 4.23 (s, 3H), 3.80 (dd,  $J = 5.9, 3.9$  Hz, 4H), 3.66 (dd,  $J = 5.8, 4.0$  Hz, 4H), 2.94 (s, 3H).  $^{13}\text{C}$  NMR (101 MHz,  $\text{DMSO-}d_6$ )  $\delta$  158.5, 155.2, 143.9, 142.6, 132.0, 122.0, 119.8, 118.8, 97.1, 66.3, 47.3, 39.3, 23.2. HRMS (ESI)  $m/z$  calcd for  $[\text{C}_{15}\text{H}_{19}\text{N}_2\text{O}]^+$   $[\text{M-I}]^+$ : 243.1492, found 243.1492.

#### 6. 7-(4-(tert-butoxycarbonyl)piperazin-1-yl)-1,2-dimethylquinolin-1-ium iodide (1f)

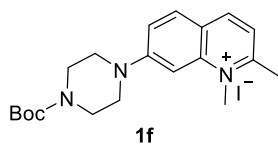

Yellow solid, m.p. = 207-209 °C;  $R_f = 0.2$  ( $\text{CH}_2\text{Cl}_2:\text{CH}_3\text{OH} = 10:1$ ); IR (KBr,  $\text{cm}^{-1}$ ): 2976.15, 1682.87, 1628.98, 1521.21, 1421.13, 1349.28, 1226.11, 1164.53, 816.74.  $^1\text{H}$  NMR (400

MHz, DMSO-*d*<sub>6</sub>)  $\delta$  8.69 (d, *J* = 8.1 Hz, 1H), 8.11 (d, *J* = 9.3 Hz, 1H), 7.71 (dd, *J* = 9.3, 2.2 Hz, 1H), 7.60 (d, *J* = 8.1 Hz, 1H), 7.22 (d, *J* = 2.2 Hz, 1H), 4.23 (s, 3H), 3.72 (dd, *J* = 6.8, 3.9 Hz, 4H), 3.54 (dd, *J* = 6.7, 3.8 Hz, 4H), 2.94 (s, 3H), 1.44 (s, 9H). <sup>13</sup>C NMR (101 MHz, DMSO-*d*<sub>6</sub>)  $\delta$  158.4, 154.6, 154.3, 143.8, 142.7, 132.0, 121.9, 119.6, 119.0, 97.0, 79.7, 46.7, 40.1, 39.3, 28.5, 23.2. HRMS (ESI) *m/z* calcd for [C<sub>20</sub>H<sub>28</sub>N<sub>3</sub>O<sub>2</sub>]<sup>+</sup> [M-*I*]<sup>+</sup>: 342.2176, found 342.2179.

### 7. 1-nitro-4-nitrosobenzene (2d)

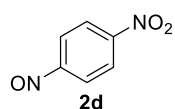

Yellow solid, m.p. = 111-113 °C; *R*<sub>f</sub> = 0.3 (CH<sub>2</sub>Cl<sub>2</sub>/PE = 1:1); IR (KBr, cm<sup>-1</sup>): 3109.58, 1613.58, 1528.91, 1346.72, 1259.47, 1102.94, 856.60. <sup>1</sup>H NMR (400 MHz, DMSO-*d*<sub>6</sub>)  $\delta$  8.57 (s, 1H), 8.55 (s, 1H), 8.20 (s, 1H), 8.17 (s, 1H). <sup>13</sup>C NMR (101 MHz, DMSO-*d*<sub>6</sub>)  $\delta$  163.7, 151.1, 126.3, 122.1. HRMS (ESI) *m/z* calcd for [C<sub>6</sub>H<sub>5</sub>N<sub>2</sub>O<sub>3</sub>]<sup>+</sup> [M+H]<sup>+</sup>: 153.0295, found 153.0293.

### 8. nitrosobenzene (2i)

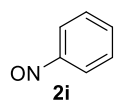

Yellow solid, m.p. = 56-58 °C; *R*<sub>f</sub> = 0.5 (CH<sub>2</sub>Cl<sub>2</sub>/PE = 1:1); IR (KBr, cm<sup>-1</sup>): 3059.92, 1481.36, 1391.70, 1190.64, 948.83, 772.23, 690.72. <sup>1</sup>H NMR (400 MHz, DMSO-*d*<sub>6</sub>)  $\delta$  7.97 (d, *J* = 1.2 Hz, 1H), 7.95 (d, *J* = 1.5 Hz, 1H), 7.92 – 7.87 (m, 1H), 7.77 (dd, *J* = 8.3, 7.2 Hz, 2H). <sup>13</sup>C NMR (101 MHz, DMSO-*d*<sub>6</sub>)  $\delta$  166.6, 137.2, 130.3, 121.2. HRMS (ESI) *m/z* calcd for [C<sub>6</sub>H<sub>6</sub>NO]<sup>+</sup> [M+H]<sup>+</sup>: 108.0444, found 108.0459.

### 9. 1-methyl-4-nitrosobenzene (2j)

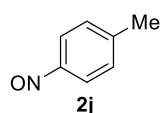

Yellow solid, m.p. = 55-57 °C; *R*<sub>f</sub> = 0.2 (CH<sub>2</sub>Cl<sub>2</sub>/PE = 1:1); IR (KBr, cm<sup>-1</sup>): 3055.70, 1924.08, 1598.19, 1495.55, 1251.77, 1013.13, 823.25, 756.53. <sup>1</sup>H NMR (400 MHz, DMSO-*d*<sub>6</sub>)  $\delta$  7.81 (d, *J* = 8.3 Hz, 2H), 7.49 (d, *J* = 8.1 Hz, 2H), 2.39 (s, 3H). <sup>13</sup>C NMR (101 MHz, DMSO-*d*<sub>6</sub>)  $\delta$  166.2, 148.5, 130.5, 121.5, 21.9. HRMS (ESI) *m/z* calcd for [C<sub>7</sub>H<sub>8</sub>NO]<sup>+</sup> [M+H]<sup>+</sup>: 122.0601, found 122.0607.

## General procedure for the synthesis of imidates

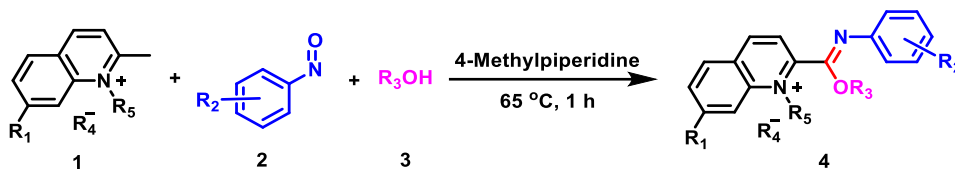

Compound **1** (0.5 mmol) was dissolved in alcohol **3** (20 mL) and 4-methylpiperidine (59  $\mu$ L, 0.5 mmol) was added to the mixture at 65  $^{\circ}$ C under air, and stirred for 5 min. Then compound **2** (1.1 mmol) was added to the mixture and stirred at 65  $^{\circ}$ C for 1 h. After the solvent was removed *in vacuo*, the crude product was purified by flash chromatography on silica gel ( $\text{CH}_2\text{Cl}_2/\text{CH}_3\text{OH} = 80/1$ ) to obtain desired product **4** as a solid.

## Analysis data of imidate products

### 1. (Z)-2-(((4-formylphenyl)imino)(methoxy)methyl)-1-methyl-7-(4-methylpiperidin-1-yl)quinolin-1-ium iodide (**4a**)

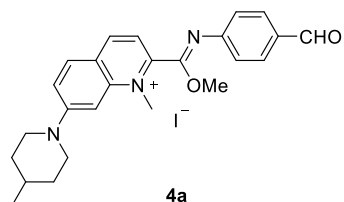

246 mg, 93% yield; Orange solid, m.p. = 164-166  $^{\circ}$ C;  $R_f = 0.3$  ( $\text{CH}_2\text{Cl}_2:\text{CH}_3\text{OH} = 10:1$ ); IR (KBr,  $\text{cm}^{-1}$ ): 3006.79, 1672.83, 1625.28, 1559.25, 1501.13, 1276.60, 1223.77, 1149.81, 816.98.  $^1\text{H}$  NMR (400 MHz,  $\text{DMSO}-d_6$ )  $\delta$  9.82 (s, 1H), 8.65 (d,  $J = 7.9$  Hz, 1H), 8.03 (d,  $J = 9.6$  Hz, 1H), 7.82 (dd,  $J = 9.6, 2.2$  Hz, 1H), 7.74 (d,  $J = 8.4$  Hz, 2H), 7.54 (d,  $J = 7.9$  Hz, 1H), 7.09 (d,  $J = 8.4$  Hz, 2H), 7.03 (d,  $J = 2.2$  Hz, 1H), 4.36 (d,  $J = 14.2$  Hz, 2H), 4.27 (s, 3H), 4.18 (s, 3H), 3.18 (t,  $J = 12.8$  Hz, 2H), 1.91-1.69 (m, 3H), 1.25-1.12 (m, 2H), 0.94 (d,  $J = 6.0$  Hz, 3H);  $^{13}\text{C}$  NMR (101 MHz,  $\text{DMSO}-d_6$ )  $\delta$  192.3, 155.2, 153.9, 151.2, 145.4, 143.7, 142.8, 132.9, 132.5, 131.3, 123.7, 122.0, 121.2, 116.5, 95.2, 65.4, 56.4, 47.8, 42.1, 34.0, 30.7, 21.9, 15.7. HRMS (ESI)  $m/z$  calcd for  $[\text{C}_{25}\text{H}_{28}\text{N}_3\text{O}_2]^+ [\text{M}-\text{I}]^+$ : 402.2176, found 402.2183.

### 2. (Z)-2-(ethoxy((4-formylphenyl)imino)methyl)-1-methyl-7-(4-methylpiperidin-1-yl)quinolin-1-ium iodide (**4b**)



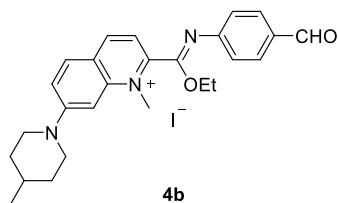

4b

277 mg, 84% yield; Orange solid, m.p. = 128-130 °C;  $R_f$  = 0.3 (CH<sub>2</sub>Cl<sub>2</sub>:CH<sub>3</sub>OH = 10:1); IR (KBr, cm<sup>-1</sup>): 3426.79, 2919.62, 1667.55, 1625.28, 1553.96, 1495.85, 1353.21, 1273.96, 1223.77, 1144.53, 822.26, 748.30. <sup>1</sup>H NMR (400 MHz, DMSO-*d*<sub>6</sub>) δ 9.81 (s, 1H), 8.63 (d, *J* = 7.9 Hz, 1H), 8.01 (d, *J* = 9.5 Hz, 1H), 7.81 (dd, *J* = 9.5, 2.2 Hz, 1H), 7.73 (d, *J* = 8.4 Hz, 2H), 7.52 (d, *J* = 7.9 Hz, 1H), 7.08 (d, *J* = 8.4 Hz, 2H), 7.02 (d, *J* = 2.2 Hz, 1H), 4.62 (q, *J* = 7.1 Hz, 2H), 4.35 (d, *J* = 13.3 Hz, 2H), 4.26 (s, 3H), 3.17 (t, *J* = 11.8 Hz, 2H), 1.84-1.74 (m, 3H), 1.46 (t, *J* = 7.1 Hz, 3H), 1.20-1.10 (m, 2H), 0.94 (d, *J* = 6.0 Hz, 3H); <sup>13</sup>C NMR (101 MHz, DMSO-*d*<sub>6</sub>) δ 192.3, 155.2, 153.4, 151.3, 145.6, 143.8, 142.8, 132.9, 132.5, 131.3, 123.7, 122.1, 121.2, 116.4, 95.2, 65.3, 47.8, 41.9, 34.0, 30.7, 21.9, 14.3. HRMS (ESI) *m/z* calcd for [C<sub>26</sub>H<sub>30</sub>N<sub>3</sub>O<sub>2</sub>]<sup>+</sup> [M-I]<sup>+</sup>: 416.2333, found 416.2337.

**3. (Z)-2-(((4-formylphenyl)imino)(propoxy)methyl)-1-methyl-7-(4-methylpiperidin-1-yl)quinolin-1-ium iodide (4c)**

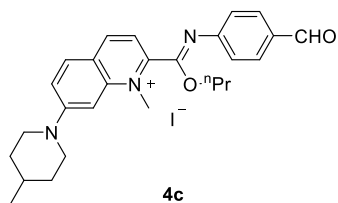

4c

223 mg, 80% yield; Orange solid, m.p. = 194-196 °C;  $R_f$  = 0.3 (CH<sub>2</sub>Cl<sub>2</sub>:CH<sub>3</sub>OH = 10:1); IR (KBr, cm<sup>-1</sup>): 3004.15, 1659.62, 1625.28, 1559.25, 1498.49, 1303.02, 1236.98, 1128.68, 814.34, 750.94. <sup>1</sup>H NMR (400 MHz, DMSO-*d*<sub>6</sub>) δ 9.82 (s, 1H), 8.63 (d, *J* = 7.9 Hz, 1H), 8.02 (d, *J* = 9.4 Hz, 1H), 7.82 (dd, *J* = 9.5, 2.2 Hz, 1H), 7.74 (d, *J* = 8.3 Hz, 2H), 7.51 (d, *J* = 7.8 Hz, 1H), 7.09 (d, *J* = 8.1 Hz, 2H), 7.03 (d, *J* = 2.2 Hz, 1H), 4.53 (t, *J* = 6.5 Hz, 2H), 4.35 (d, *J* = 13.6 Hz, 2H), 4.28 (s, 3H), 3.18 (t, *J* = 12.3 Hz, 2H), 1.91-1.83 (m, 2H), 1.82-1.73 (m, 3H), 1.25-1.11 (m, 2H), 1.04 (t, *J* = 7.4 Hz, 3H), 0.94 (d, *J* = 6.0 Hz, 3H); <sup>13</sup>C NMR (101 MHz, DMSO-*d*<sub>6</sub>) δ 192.3, 155.2, 153.6, 151.4, 145.5, 143.8, 142.8, 132.9, 132.5, 131.3, 123.7, 122.1, 121.2, 116.4, 95.2, 70.8, 47.9, 42.0, 34.0, 30.7, 21.9, 21.7, 10.9. HRMS (ESI) *m/z* calcd for [C<sub>27</sub>H<sub>32</sub>N<sub>3</sub>O<sub>2</sub>]<sup>+</sup> [M]<sup>+</sup>: 430.2489, found 430.2503.

**4. (Z)-2-(((4-formylphenyl)imino)(isopropoxy)methyl)-1-methyl-7-(4-methylpiperidin-1-yl)quinolin-1-ium iodide (4d)**

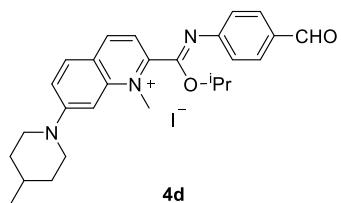

4d

206 mg, 74% yield; Orange solid, m.p. = 182-184 °C;  $R_f$  = 0.3 ( $\text{CH}_2\text{Cl}_2:\text{CH}_3\text{OH} = 10:1$ ); IR (KBr,  $\text{cm}^{-1}$ ): 2924.83, 1667.47, 1628.98, 1562.26, 1503.25, 1305.66, 1226.11, 1154.26, 1095.25, 964.38, 820.68.  $^1\text{H}$  NMR (400 MHz,  $\text{DMSO}-d_6$ )  $\delta$  9.81 (s, 1H), 8.64 (d,  $J = 7.9$  Hz, 1H), 8.01 (d,  $J = 9.6$  Hz, 1H), 7.81 (dd,  $J = 9.5, 2.1$  Hz, 1H), 7.73 (d,  $J = 8.4$  Hz, 2H), 7.51 (d,  $J = 7.9$  Hz, 1H), 7.11 (d,  $J = 8.4$  Hz, 2H), 7.02 (d,  $J = 2.2$  Hz, 1H), 4.35 (d,  $J = 13.7$  Hz, 2H), 4.27 (s, 3H), 3.18 (t,  $J = 12.5$  Hz, 2H), 1.83-1.75 (m, 4H), 1.50 (d,  $J = 6.0$  Hz, 6H), 1.24-1.14 (m, 2H), 0.94 (d,  $J = 6.0$  Hz, 3H);  $^{13}\text{C}$  NMR (101 MHz,  $\text{DMSO}-d_6$ )  $\delta$  192.3, 155.2, 152.7, 151.4, 145.7, 143.8, 142.8, 132.8, 132.5, 131.3, 123.6, 122.1, 121.2, 120.6, 116.4, 95.2, 73.0, 65.4, 47.8, 41.8, 34.0, 30.7, 21.9. HRMS (ESI)  $m/z$  calcd for  $[\text{C}_{27}\text{H}_{32}\text{N}_3\text{O}_2]^+ [\text{M}-\text{I}]^+$ : 430.2489, found 430.2506.

**5. (Z)-2-(butoxy((4-formylphenyl)imino)methyl)-1-methyl-7-(4-methylpiperidin-1-yl)quinolin-1-ium iodide (4e)**

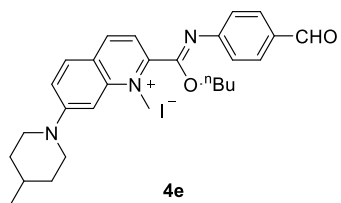

4e

246 mg, 86% yield; Orange solid, m.p. = 212-214 °C;  $R_f$  = 0.3 ( $\text{CH}_2\text{Cl}_2:\text{CH}_3\text{OH} = 10:1$ ); IR (KBr,  $\text{cm}^{-1}$ ): 2945.36, 1664.91, 1626.42, 1562.26, 1500.68, 1356.98, 1308.23, 1236.38, 1154.26, 948.98, 820.68.  $^1\text{H}$  NMR (400 MHz,  $\text{DMSO}-d_6$ )  $\delta$  9.82 (s, 1H), 8.63 (d,  $J = 7.9$  Hz, 1H), 8.02 (d,  $J = 9.5$  Hz, 1H), 7.82 (dd,  $J = 9.6, 2.2$  Hz, 1H), 7.74 (d,  $J = 8.3$  Hz, 2H), 7.50 (d,  $J = 7.9$  Hz, 1H), 7.09 (d,  $J = 8.1$  Hz, 2H), 7.03 (d,  $J = 2.2$  Hz, 1H), 4.57 (t,  $J = 6.4$  Hz, 2H), 4.36 (d,  $J = 13.6$  Hz, 2H), 4.28 (s, 3H), 3.18 (t,  $J = 12.6$  Hz, 2H), 1.87-1.80 (m, 3H), 1.80-1.73 (m, 2H), 1.56-1.43 (m, 2H), 1.26-1.11 (m, 2H), 0.99 (d,  $J = 7.4$  Hz, 3H), 1.01-0.92 (m, 3H).  $^{13}\text{C}$  NMR (101 MHz,  $\text{DMSO}-d_6$ )  $\delta$  191.2, 154.1, 152.5, 150.3, 144.4, 142.7, 141.8, 131.8, 131.4, 130.2, 122.6, 121.0, 120.1, 115.3, 94.1, 68.0, 46.8, 40.9, 32.9, 29.6, 29.2, 20.8, 18.2, 13.1. HRMS (ESI)  $m/z$  calcd for  $[\text{C}_{28}\text{H}_{34}\text{N}_3\text{O}_2]^+ [\text{M}-\text{I}]^+$ : 444.2646, found 444.2666.

**6. (Z)-2-((benzyloxy)((4-formylphenyl)imino)methyl)-1-methyl-7-(4-methylpiperidin-1-yl)quinolin-1-ium iodide (4f)**

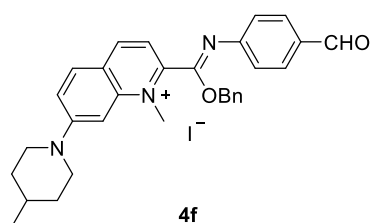

4f

184 mg, 61% yield; Orange solid, m.p. = 145-147 °C;  $R_f$  = 0.3 (CH<sub>2</sub>Cl<sub>2</sub>:CH<sub>3</sub>OH = 10:1); IR (KBr, cm<sup>-1</sup>): 3011.02, 1677.32, 1629.77, 1594.11, 1560.83, 1503.77, 1358.75, 1306.45, 1273.17, 1223.25, 1151.92, 959.36, 840.75, 750.94. <sup>1</sup>H NMR (400 MHz, DMSO-*d*<sub>6</sub>) δ 9.84 (s, 1H), 8.64 (d, *J* = 7.9 Hz, 1H), 8.02 (d, *J* = 9.6 Hz, 1H), 7.81 (dd, *J* = 9.4, 2.1 Hz, 1H), 7.77 (d, *J* = 8.4 Hz, 2H), 7.64 – 7.59 (m, 2H), 7.55 (d, *J* = 7.9 Hz, 1H), 7.49 – 7.40 (m, 3H), 7.12 (d, *J* = 8.4 Hz, 2H), 7.02 (d, *J* = 2.2 Hz, 1H), 5.65 (s, 2H), 4.35 (d, *J* = 13.8 Hz, 2H), 4.29 (s, 3H), 3.18 (t, *J* = 12.4 Hz, 2H), 1.83-1.75 (m, 3H), 1.22-1.10 (m, 2H), 0.93 (d, *J* = 6.0 Hz, 3H); <sup>13</sup>C NMR (101 MHz, DMSO-*d*<sub>6</sub>) δ 192.3, 155.1, 153.2, 151.1, 145.2, 143.8, 142.9, 135.4, 133.0, 132.5, 131.4, 129.4, 129.1, 123.8, 122.1, 121.2, 116.5, 95.2, 95.2, 70.8, 47.9, 42.0, 34.0, 30.7, 21.9. HRMS (ESI) *m/z* calcd for [C<sub>31</sub>H<sub>32</sub>N<sub>3</sub>O<sub>2</sub>]<sup>+</sup> [M-I]<sup>+</sup>: 478.2489, found 478.2499.

**7. (Z)-2-(((4-formylphenyl)imino)((4-methylbenzyl)oxy)methyl)-1-methyl-7-(4-methylpiperidin-1-yl)quinolin-1-ium iodide (4g)**

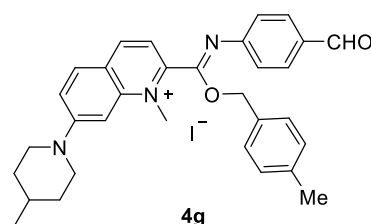

4g

203 mg, 74% yield; Orange solid, m.p. = 139-141 °C;  $R_f$  = 0.3 (CH<sub>2</sub>Cl<sub>2</sub>:CH<sub>3</sub>OH = 10:1); IR (KBr, cm<sup>-1</sup>): 2924.83, 1685.43, 1628.98, 1580.23, 1503.25, 1351.85, 1303.09, 1223.55, 1154.26, 966.94, 854.04. <sup>1</sup>H NMR (400 MHz, DMSO-*d*<sub>6</sub>) δ 9.83 (s, 1H), 8.62 (d, *J* = 7.9 Hz, 1H), 8.01 (d, *J* = 9.6 Hz, 1H), 7.83 – 7.78 (m, 1H), 7.76 (d, *J* = 8.5 Hz, 2H), 7.55 – 7.50 (m, 2H), 7.49 (s, 1H), 7.26 (d, *J* = 7.8 Hz, 2H), 7.11 (d, *J* = 8.4 Hz, 2H), 7.01 (s, 1H), 5.59 (s, 2H), 4.35 (d, *J* = 13.8 Hz, 2H), 4.26 (s, 3H), 3.17 (t, *J* = 12.3 Hz, 2H), 2.34 (s, 3H), 1.83-1.75 (m, 3H), 1.20-1.12 (m, 2H), 0.93 (d, *J* = 6.0 Hz, 3H); <sup>13</sup>C NMR (101 MHz, DMSO-*d*<sub>6</sub>) δ 192.3, 155.1, 153.2, 151.2, 145.2, 143.8, 142.9, 138.6, 133.0, 132.5, 132.4, 131.4, 129.8, 129.6, 123.7, 122.1, 121.2, 116.5, 95.2, 70.7, 47.8, 42.0, 34.0, 30.7, 21.9, 21.3. HRMS (ESI) *m/z* calcd for [C<sub>32</sub>H<sub>34</sub>N<sub>3</sub>O<sub>2</sub>]<sup>+</sup> [M-I]<sup>+</sup>: 492.2646, found 492.2631.

**8. (Z)-2-(((3-formylphenyl)imino)(methoxy)methyl)-1-methyl-7-(4-methylpiperidin-1-yl)quinolin-1-ium iodide (4i)**

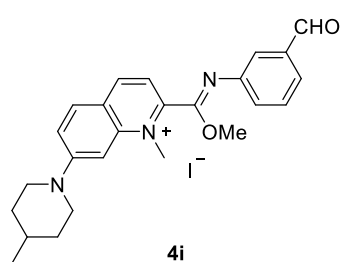

4i

194 mg, 73% yield; Orange solid, m.p. = 152-154 °C;  $R_f$  = 0.3 ( $\text{CH}_2\text{Cl}_2:\text{CH}_3\text{OH}$  = 10:1); IR (KBr,  $\text{cm}^{-1}$ ): 3006.94, 2935.09, 1682.87, 1626.42, 1562.26, 1508.38, 1310.79, 1231.25, 956.68, 818.11, 684.68.  $^1\text{H}$  NMR (400 MHz,  $\text{DMSO}-d_6$ )  $\delta$  9.89 (s, 1H), 8.65 (d,  $J$  = 7.9 Hz, 1H), 8.02 (d,  $J$  = 9.5 Hz, 1H), 7.82 (dd,  $J$  = 9.4, 2.2 Hz, 1H), 7.57 (d,  $J$  = 7.9 Hz, 1H), 7.54 (d,  $J$  = 7.5 Hz, 1H), 7.45 – 7.37 (m, 2H), 7.17 (d,  $J$  = 7.8 Hz, 1H), 7.01 (d,  $J$  = 2.3 Hz, 1H), 4.35 (d,  $J$  = 13.2 Hz, 2H), 4.24 (s, 3H), 4.17 (s, 3H), 3.17 (t,  $J$  = 12.5 Hz, 2H), 1.85-1.72 (m, 3H), 1.28-1.11 (m, 2H), 0.94 (d,  $J$  = 5.9 Hz, 3H);  $^{13}\text{C}$  NMR (101 MHz,  $\text{DMSO}-d_6$ )  $\delta$  193.2, 155.2, 154.4, 146.4, 145.6, 143.7, 142.8, 137.5, 132.5, 130.6, 127.2, 126.1, 123.6, 121.8, 121.2, 116.6, 95.1, 65.4, 56.2, 47.8, 42.0, 34.0, 30.6, 21.9, 15.6. HRMS (ESI)  $m/z$  calcd for  $[\text{C}_{25}\text{H}_{28}\text{N}_3\text{O}_2]^+$   $[\text{M}-\text{I}]^+$ : 402.2176, found 402.2170.

**9. (Z)-2-(methoxy((4-nitrophenyl)imino)methyl)-1-methyl-7-(4-methylpiperidin-1-yl)quinolin-1-ium iodide (4j)**

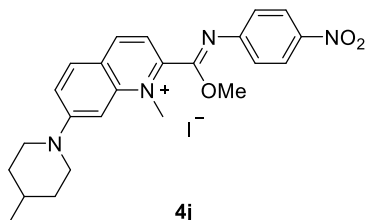

4j

227 mg, 83% yield; Orange solid, m.p. = 160-162 °C;  $R_f$  = 0.3 ( $\text{CH}_2\text{Cl}_2:\text{CH}_3\text{OH}$  = 10:1); IR (KBr,  $\text{cm}^{-1}$ ): 3006.79, 1678.11, 1627.92, 1556.60, 1503.77, 1329.43, 1276.60, 1229.06, 851.32, 753.58.  $^1\text{H}$  NMR (400 MHz,  $\text{DMSO}-d_6$ )  $\delta$  8.67 (d,  $J$  = 7.9 Hz, 1H), 8.08 (d,  $J$  = 9.0 Hz, 2H), 8.04 (d,  $J$  = 9.6 Hz, 1H), 7.83 (dd,  $J$  = 9.6, 2.2 Hz, 1H), 7.57 (d,  $J$  = 7.8 Hz, 1H), 7.14 (d,  $J$  = 8.9 Hz, 2H), 7.03 (d,  $J$  = 2.3 Hz, 1H), 4.37 (d,  $J$  = 13.4 Hz, 2H), 4.26 (s, 3H), 4.18 (s, 3H), 3.23 – 3.13 (m, 2H), 1.84-1.75 (m, 3H), 1.24-1.12 (m, 2H), 0.94 (d,  $J$  = 6.0 Hz, 3H);  $^{13}\text{C}$  NMR (101 MHz,  $\text{DMSO}-d_6$ )  $\delta$  155.2, 154.2, 151.9, 145.0, 144.3, 143.8, 142.9, 132.5, 125.5, 123.8, 122.4, 121.3, 116.4, 95.2, 65.4, 56.6, 47.8, 42.0, 34.0, 30.7, 21.9, 15.6. HRMS (ESI)  $m/z$  calcd for  $[\text{C}_{24}\text{H}_{27}\text{N}_4\text{O}_3]^+$   $[\text{M}-\text{I}]^+$ : 419.2078, found 419.2076.

**10. (Z)-2-(methoxy((4-(methoxycarbonyl)phenyl)imino)methyl)-1-methyl-7-(4-methylpiperidin-1-yl)quinolin-1-ium iodide (4k)**

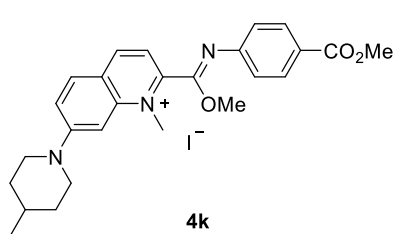

245 mg, 88% yield; Orange solid, m.p. = 186-188 °C;  $R_f = 0.3$  ( $\text{CH}_2\text{Cl}_2:\text{CH}_3\text{OH} = 10:1$ ); IR (KBr,  $\text{cm}^{-1}$ ): 2947.92, 1716.23, 1670.04, 1628.98, 1559.70, 1505.81, 1426.26, 1359.55, 1310.79, 1280.00, 1228.68, 1164.53, 1102.94, 956.68, 854.04.  $^1\text{H}$  NMR

(400 MHz,  $\text{DMSO}-d_6$ )  $\delta$  8.65 (d,  $J = 7.9$  Hz, 1H), 8.03 (d,  $J = 9.5$  Hz, 1H), 7.82 (dd,  $J = 9.6, 2.2$  Hz, 1H), 7.77 (d,  $J = 8.5$  Hz, 2H), 7.53 (d,  $J = 7.9$  Hz, 1H), 7.04-7.00 (m, 2H), 7.00 (d,  $J = 1.9$  Hz, 1H), 4.36 (d,  $J = 13.1$  Hz, 2H), 4.25 (s, 3H), 4.16 (s, 3H), 3.75 (s, 3H), 3.18 (t,  $J = 12.3$  Hz, 2H), 1.86-1.72 (m, 3H), 1.25-1.12 (m, 2H), 0.94 (d,  $J = 5.9$  Hz, 3H);  $^{13}\text{C}$  NMR (101 MHz,  $\text{DMSO}-d_6$ )  $\delta$  166.1, 155.2, 154.0, 150.1, 145.5, 143.7, 142.8, 132.5, 130.9, 125.9, 123.7, 121.6, 121.2, 116.5, 95.2, 56.3, 52.5, 47.8, 42.0, 34.0, 30.6, 21.9. HRMS (ESI)  $m/z$  calcd for  $[\text{C}_{26}\text{H}_{30}\text{N}_3\text{O}_3]^+$   $[\text{M}-\text{I}]^+$ : 432.2282, found 432.2286.

**11. (Z)-2-(((4-cyanophenyl)imino)(methoxy)methyl)-1-methyl-7-(4-methylpiperidin-1-yl)quinolin-1-ium iodide (4l)**

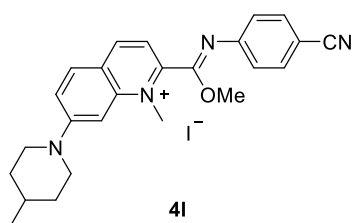

224 mg, 85% yield; Orange solid, m.p. = 160-162 °C;  $R_f = 0.3$  ( $\text{CH}_2\text{Cl}_2:\text{CH}_3\text{OH} = 10:1$ ); IR (KBr,  $\text{cm}^{-1}$ ): 3432.55, 2927.39, 2222.12, 1674.30, 1630.02, 1561.13, 1507.01, 1279.03, 1229.82, 1172.42, 957.55, 855.86.  $^1\text{H}$  NMR

(400 MHz,  $\text{DMSO}-d_6$ )  $\delta$  8.65 (d,  $J = 7.8$  Hz, 1H), 8.02 (d,  $J = 9.6$  Hz, 1H), 7.82 (dd,  $J = 9.6, 2.2$  Hz, 1H), 7.67 (d,  $J = 8.5$  Hz, 2H), 7.53 (d,  $J = 7.9$  Hz, 1H), 7.06 (d,  $J = 8.5$  Hz, 2H), 7.01 (d,  $J = 2.2$  Hz, 1H), 4.35 (d,  $J = 13.6$  Hz, 2H), 4.22 (s, 3H), 4.15 (s, 3H), 3.18 (t,  $J = 12.3$  Hz, 2H), 1.86-1.71 (m, 3H), 1.24-1.11 (m, 2H), 0.94 (d,  $J = 6.0$  Hz, 3H);  $^{13}\text{C}$  NMR (101 MHz,  $\text{DMSO}-d_6$ )  $\delta$  155.2, 154.2, 150.0, 145.2, 143.8, 142.9, 134.0, 132.6, 123.8, 122.5, 121.3, 119.1, 116.5, 107.2, 95.1, 56.4, 47.8, 42.0, 34.0, 30.7, 21.9; HRMS (ESI)  $m/z$  calcd for  $[\text{C}_{25}\text{H}_{27}\text{N}_4\text{O}]^+$   $[\text{M}-\text{I}]^+$ : 399.2179, found 399.2170.

**12. (Z)-2-(((4-chlorophenyl)imino)(methoxy)methyl)-1-methyl-7-(4-methylpiperidin-1-yl)quinolin-1-ium iodide (4m)**

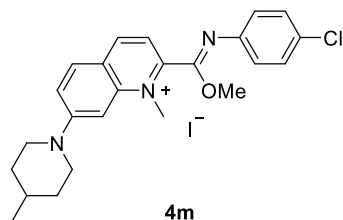

4m

210 mg, 78% yield; Orange solid, m.p. = 180-182 °C;  $R_f$  = 0.3 (CH<sub>2</sub>Cl<sub>2</sub>:CH<sub>3</sub>OH = 10:1); IR (KBr, cm<sup>-1</sup>): 2927.40, 1670.04, 1628.98, 1564.83, 1505.81, 1310.79, 1228.68, 1169.66, 961.81, 838.64. <sup>1</sup>H NMR (400 MHz, DMSO-*d*<sub>6</sub>) δ 8.66 (d, *J* = 7.9 Hz, 1H), 8.04 (d, *J* = 9.4 Hz, 1H), 7.83 (d, *J* = 9.6 Hz, 1H), 7.51 (d, *J* = 7.9 Hz, 1H), 7.24 (d, *J* = 8.2 Hz, 2H), 7.03 (s, 1H), 6.89 (d, *J* = 8.1 Hz, 2H), 4.36 (d, *J* = 13.6 Hz, 2H), 4.22 (s, 3H), 4.13 (s, 3H), 3.18 (t, *J* = 12.8 Hz, 2H), 1.88-1.70 (m, 3H), 1.28-1.11 (m, 2H), 0.94 (d, *J* = 5.9 Hz, 3H); <sup>13</sup>C NMR (101 MHz, DMSO-*d*<sub>6</sub>) δ 155.2, 154.1, 145.8, 144.5, 143.8, 142.8, 132.5, 129.6, 128.9, 123.6, 123.2, 121.2, 116.6, 95.2, 56.1, 47.8, 41.9, 34.0, 30.7, 21.9. HRMS (ESI) *m/z* calcd for [C<sub>24</sub>H<sub>27</sub>ClN<sub>3</sub>O]<sup>+</sup> [M-I]<sup>+</sup>: 408.1837, found 408.1839.

**13. (Z)-2-(((4-bromophenyl)imino)(methoxy)methyl)-1-methyl-7-(4-methylpiperidin-1-yl)quinolin-1-ium iodide (4n)**

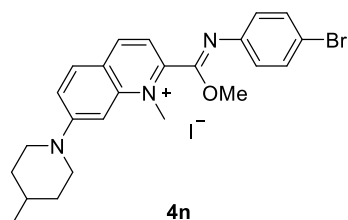

4n

240 mg, 83% yield; Orange solid, m.p. = 157-159 °C;  $R_f$  = 0.3 (CH<sub>2</sub>Cl<sub>2</sub>:CH<sub>3</sub>OH = 10:1); IR (KBr, cm<sup>-1</sup>): 2945.36, 1670.04, 1631.55, 1559.70, 1505.81, 1362.11, 1313.36, 1228.68, 1172.23, 959.25, 859.17. <sup>1</sup>H NMR (400 MHz, DMSO-*d*<sub>6</sub>) δ 8.67 (d, *J* = 7.9 Hz, 1H), 8.04 (d, *J* = 9.5 Hz, 1H), 7.83 (dd, *J* = 9.6, 2.2 Hz, 1H), 7.51 (d, *J* = 7.9 Hz, 1H), 7.36 (d, *J* = 8.5 Hz, 2H), 7.03 (d, *J* = 2.2 Hz, 1H), 6.83 (d, *J* = 8.2 Hz, 2H), 4.36 (d, *J* = 13.4 Hz, 2H), 4.22 (s, 3H), 4.13 (s, 3H), 3.25 – 3.12 (m, 2H), 1.88-1.71 (m, 3H), 1.27-1.11 (m, 2H), 0.94 (d, *J* = 6.0 Hz, 3H); <sup>13</sup>C NMR (101 MHz, DMSO-*d*<sub>6</sub>) δ 155.2, 154.0, 145.8, 144.9, 143.7, 142.8, 132.5, 132.5, 124.1, 123.6, 121.2, 117.1, 116.6, 95.2, 56.1, 47.8, 41.9, 34.0, 30.7, 21.9. HRMS (ESI) *m/z* calcd for [C<sub>24</sub>H<sub>27</sub>BrN<sub>3</sub>O]<sup>+</sup> [M-I]<sup>+</sup>: 452.1332, found 452.1349.

**14. (Z)-2-((benzyloxy)((4-bromophenyl)imino)methyl)-1-methyl-7-(4-methylpiperidin-1-yl)quinolin-1-ium iodide (4o)**

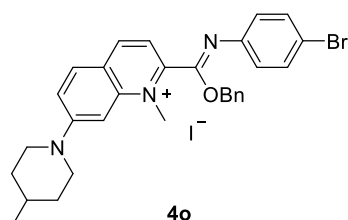

4o

192 mg, 59% yield; Orange solid, m.p. = 137-139 °C;  $R_f$  = 0.3 (CH<sub>2</sub>Cl<sub>2</sub>:CH<sub>3</sub>OH = 10:1); IR (KBr, cm<sup>-1</sup>): 2922.26, 2852.98, 1672.60, 1626.42, 1559.70, 1505.81, 1305.66, 1223.55. <sup>1</sup>H NMR (400 MHz, DMSO-*d*<sub>6</sub>) δ 8.82 (d, *J* =

8.1 Hz, 1H), 8.15 (d,  $J = 9.5$  Hz, 1H), 7.87 – 7.78 (m, 2H), 7.42 – 7.39 (m, 6H), 7.17 (s, 1H), 6.87 (d,  $J = 8.9$  Hz, 2H), 6.45 (d,  $J = 8.3$  Hz, 1H), 4.83-4.58 (m, 2H), 4.37 (d,  $J = 13.4$  Hz, 2H), 4.23 (s, 3H), 3.18 (t,  $J = 11.7$  Hz, 2H), 1.86-1.73 (m, 3H), 1.27-1.12 (m, 2H), 0.95 (d,  $J = 6.1$  Hz, 3H);  $^{13}\text{C}$  NMR (101 MHz,  $\text{DMSO-}d_6$ )  $\delta$  155.0, 154.6, 145.1, 144.2, 144.0, 137.5, 132.3, 132.2, 128.8, 128.5, 128.4, 123.1, 120.4, 116.3, 115.2, 110.3, 95.6, 82.7, 69.8, 47.9, 39.5, 33.9, 30.7, 22.0. HRMS (ESI)  $m/z$  calcd for  $[\text{C}_{30}\text{H}_{31}\text{BrN}_3\text{O}]^+ [\text{M-I}]^+$ : 528.1645, found 528.1638.

**15. (Z)-2-(methoxy(phenylimino)methyl)-1-methyl-7-(4-methylpiperidin-1-yl)quinolin-1-ium iodide (4p)**

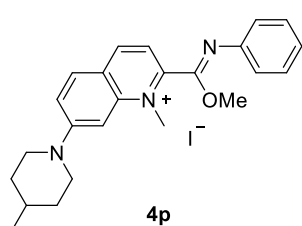

153 mg, 61% yield; Orange solid, m.p. = 162-164 °C;  $R_f = 0.3$  ( $\text{CH}_2\text{Cl}_2:\text{CH}_3\text{OH} = 10:1$ ); IR (KBr,  $\text{cm}^{-1}$ ): 3009.43, 2924.91, 1670.19, 1627.92, 1561.89, 1506.42, 1361.13, 1313.58, 1273.96, 1223.77, 1155.09, 853.96, 750.94.  $^1\text{H}$  NMR (400 MHz,  $\text{DMSO-}d_6$ )  $\delta$  8.64 (d,  $J = 7.9$  Hz, 1H), 8.03 (d,  $J = 9.5$  Hz, 1H), 7.82 (dd,  $J = 9.6, 2.2$  Hz, 1H), 7.49 (d,  $J = 7.9$  Hz, 1H), 7.18 (t,  $J = 7.8$  Hz, 2H), 7.02 (d,  $J = 2.3$  Hz, 1H), 7.00-6.94 (m, 1H), 6.87-6.85 (m, 1H), 6.84 (s, 1H), 4.35 (d,  $J = 13.4$  Hz, 2H), 4.22 (s, 3H), 4.13 (s, 3H), 3.17 (t,  $J = 11.7$  Hz, 2H), 1.85-1.74 (m, 3H), 1.24-1.11 (m, 2H), 0.94 (d,  $J = 6.0$  Hz, 3H);  $^{13}\text{C}$  NMR (101 MHz,  $\text{DMSO-}d_6$ )  $\delta$  155.1, 153.7, 146.3, 145.5, 143.7, 142.7, 132.5, 129.6, 124.8, 123.5, 121.3, 121.1, 116.7, 95.2, 65.4, 55.9, 47.8, 42.0, 34.0, 30.7, 21.9, 15.7. HRMS (ESI)  $m/z$  calcd for  $[\text{C}_{24}\text{H}_{28}\text{N}_3\text{O}]^+ [\text{M-I}]^+$ : 374.2227, found 374.2239.

**16. (Z)-2-(methoxy(p-tolylimino)methyl)-1-methyl-7-(4-methylpiperidin-1-yl)quinolin-1-ium iodide (4q)**

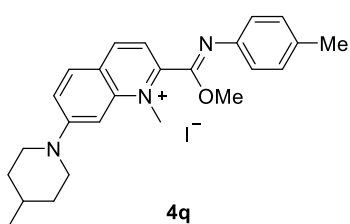

196 mg, 76% yield; Orange solid, m.p. = 162-164 °C;  $R_f = 0.3$  ( $\text{CH}_2\text{Cl}_2:\text{CH}_3\text{OH} = 10:1$ ); IR (KBr,  $\text{cm}^{-1}$ ): 3014.72, 2924.91, 1667.55, 1622.64, 1561.89, 1506.42, 1358.49, 1276.60, 1226.42, 1157.74, 956.98, 859.25, 748.30.  $^1\text{H}$  NMR (400 MHz,  $\text{DMSO-}d_6$ )  $\delta$  8.65 (d,  $J = 7.9$  Hz, 1H), 8.04 (d,  $J = 9.5$  Hz, 1H), 7.82 (dd,  $J = 9.6, 2.1$  Hz, 1H), 7.48 (d,  $J = 7.9$  Hz, 1H), 7.05

(d,  $J = 1.9$  Hz, 1H), 6.98 (d,  $J = 7.8$  Hz, 2H), 6.73 (d,  $J = 7.8$  Hz, 2H), 4.35 (d,  $J = 13.5$  Hz, 2H), 4.22 (s, 3H), 4.11 (s, 3H), 3.17 (t,  $J = 12.3$  Hz, 2H), 2.14 (s, 3H), 1.88-1.70 (m, 3H), 1.24-1.11 (m, 2H), 0.94 (d,  $J = 6.0$  Hz, 3H);  $^{13}\text{C}$  NMR (101 MHz, DMSO- $d_6$ )  $\delta$  155.1, 153.5, 146.5, 143.7, 142.9, 142.7, 133.8, 132.5, 130.1, 123.5, 121.2, 121.1, 116.7, 95.2, 65.4, 55.9, 47.8, 41.9, 34.0, 30.7, 21.9, 20.8, 15.7. HRMS (ESI)  $m/z$  calcd for  $[\text{C}_{25}\text{H}_{30}\text{BrN}_3\text{O}]^+$   $[\text{M}-\text{I}]^+$ : 388.2383, found 388.2400.

**17. (Z)-2-(methoxy((4-methoxyphenyl)imino)methyl)-1-methyl-7-(4-methylpiperidin-1-yl)quinolin-1-ium iodide (4r)**

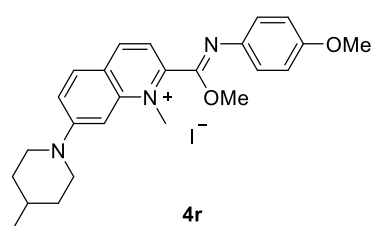

163 mg, 61% yield; Orange solid, m.p. = 155-157 °C;  $R_f$  = 0.3 ( $\text{CH}_2\text{Cl}_2:\text{CH}_3\text{OH} = 10:1$ ); IR (KBr,  $\text{cm}^{-1}$ ): 2919.70, 1667.47, 1623.85, 1559.70, 1503.25, 1459.62, 1362.11, 1310.79, 1223.55, 1169.66, 1020.83, 825.81.  $^1\text{H}$  NMR (400 MHz, DMSO- $d_6$ )  $\delta$  8.65 (d,  $J = 7.9$  Hz, 1H), 8.04

(d,  $J = 9.5$  Hz, 1H), 7.82 (dd,  $J = 9.5, 2.2$  Hz, 1H), 7.47 (d,  $J = 7.9$  Hz, 1H), 7.03 (d,  $J = 2.2$  Hz, 1H), 6.81 – 6.68 (m, 4H), 4.35 (d,  $J = 13.5$  Hz, 2H), 4.19 (s, 3H), 4.10 (s, 3H), 3.61 (s, 3H), 3.17 (t,  $J = 12.5$  Hz, 2H), 1.85-1.74 (m, 3H), 1.21-1.13 (m, 2H), 0.94 (d,  $J = 6.0$  Hz, 3H);  $^{13}\text{C}$  NMR (101 MHz, DMSO- $d_6$ )  $\delta$  156.5, 155.1, 153.5, 146.8, 143.8, 142.7, 138.3, 132.5, 125.2, 123.5, 122.5, 121.1, 116.7, 115.2, 114.8, 95.3, 55.8, 55.5, 47.8, 41.8, 34.0, 30.7, 21.9. HRMS (ESI)  $m/z$  calcd for  $[\text{C}_{25}\text{H}_{30}\text{N}_3\text{O}_2]^+$   $[\text{M}-\text{I}]^+$ : 404.2333, found 404.2333.

**18. (Z)-2-(((4-cyanophenyl)imino)(methoxy)methyl)-1-methyl-7-(4-methylpiperidin-1-yl)quinolin-1-ium trifluoromethanesulfonate (4s)**

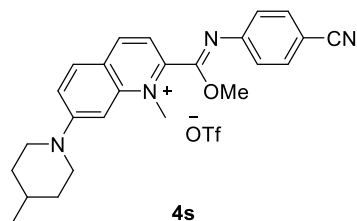

183 mg, 67% yield; Orange solid, m.p. = 151-153 °C;  $R_f$  = 0.3 ( $\text{CH}_2\text{Cl}_2:\text{CH}_3\text{OH} = 10:1$ ); IR (KBr,  $\text{cm}^{-1}$ ): 3599.90, 2951.04, 2225.65, 1681.16, 1630.72, 1564.61, 1508.95, 1228.88, 1152.34, 1027.09, 867.05, 637.42.  $^1\text{H}$  NMR (400 MHz, DMSO- $d_6$ )  $\delta$  8.64 (d,  $J = 7.8$  Hz, 1H), 8.02 (d,

$J = 9.5$  Hz, 1H), 7.82 (dd,  $J = 9.5, 2.2$  Hz, 1H), 7.66 (d,  $J = 8.5$  Hz, 2H), 7.52 (d,  $J = 7.8$  Hz, 1H), 7.05 (d,  $J = 8.5$  Hz, 2H), 7.01 (s, 1H), 4.35 (d,  $J = 13.6$  Hz, 2H), 4.22 (s,



3H), 4.15 (s, 3H), 3.17 (t,  $J = 12.3$  Hz, 2H), 1.84-1.74 (m, 3H), 1.25 –1.13 (m, 2H), 0.94 (d,  $J = 6.0$  Hz, 3H);  $^{13}\text{C}$  NMR (101 MHz,  $\text{DMSO-}d_6$ )  $\delta$  155.2, 154.1, 150.0, 145.2, 143.8, 142.9, 134.0, 132.5, 123.8, 122.4, 121.2, 119.1, 116.5, 107.3, 95.1, 56.4, 47.8, 41.9, 34.0, 30.7, 21.9;  $^{19}\text{F}$  NMR (376 MHz,  $\text{DMSO-}d_6$ ):  $\delta$  -77.76 (s), -77.75 (s). HRMS (ESI)  $m/z$  calcd for  $[\text{C}_{25}\text{H}_{27}\text{N}_4\text{O}]^+$   $[\text{M-OTf}]^+$ : 399.2179, found 399.2179.

**19. (Z)-2-(((4-cyanophenyl)imino)(methoxy)methyl)-1-ethyl-7-(4-methylpiperidin-1-yl)quinolin-1-ium iodide (4t)**

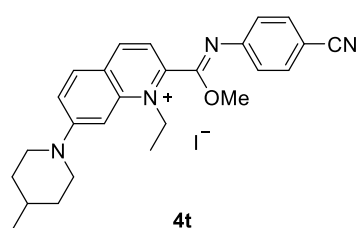

250 mg, 93% yield; Orange solid, m.p. = 166-168 °C;  $R_f$  = 0.3 ( $\text{CH}_2\text{Cl}_2:\text{CH}_3\text{OH} = 10:1$ ); IR (KBr,  $\text{cm}^{-1}$ ): 3427.63, 2925.75, 2222.12, 1674.30, 1628.38, 1562.77, 1507.01, 1365.95, 1293.79, 1228.18, 1169.14, 955.91, 846.02.  $^1\text{H}$  NMR (400 MHz,  $\text{DMSO-}d_6$ )  $\delta$  8.64 (d,  $J = 7.9$  Hz, 1H),

8.03 (d,  $J = 9.5$  Hz, 1H), 7.82 (dd,  $J = 9.7, 2.1$  Hz, 1H), 7.67 (d,  $J = 8.5$  Hz, 2H), 7.52 (d,  $J = 7.8$  Hz, 1H), 7.07 (d,  $J = 8.4$  Hz, 2H), 7.04 (d,  $J = 2.1$  Hz, 1H). 5.14-4.52 (m, 2H), 4.36 (d,  $J = 13.5$  Hz, 2H), 4.16 (s, 3H), 3.18 (t,  $J = 12.4$  Hz, 2H), 1.84-1.75 (m, 3H), 1.50 (t,  $J = 6.9$  Hz, 3H), 1.24-1.10 (m, 2H), 0.93 (d,  $J = 6.0$  Hz, 3H);  $^{13}\text{C}$  NMR (101 MHz,  $\text{DMSO-}d_6$ )  $\delta$  155.3, 154.1, 150.0, 144.7, 144.0, 141.5, 133.9, 132.9, 124.3, 122.5, 121.3, 119.1, 116.9, 107.2, 94.9, 56.3, 49.6, 47.9, 34.0, 30.7, 21.9, 14.0. HRMS (ESI)  $m/z$  calcd for  $[\text{C}_{26}\text{H}_{29}\text{N}_4\text{O}]^+$   $[\text{M-I}]^+$ : 413.2336, found 413.2343.

**20. (Z)-2-(((4-formylphenyl)imino)(methoxy)methyl)-1-methyl-7-morpholinoquinolin-1-ium iodide (4u)**

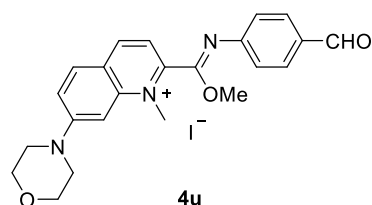

176 mg, 68% yield; Orange solid, m.p. = 181-183 °C;  $R_f$  = 0.3 ( $\text{CH}_2\text{Cl}_2:\text{CH}_3\text{OH} = 10:1$ ); IR (KBr,  $\text{cm}^{-1}$ ): 2985.66, 2848.30, 1672.83, 1627.92, 1564.53, 1493.21, 1355.85, 1273.96, 1110.19, 1057.36, 951.70, 816.98, 753.58.  $^1\text{H}$

NMR (400 MHz,  $\text{DMSO-}d_6$ )  $\delta$  9.81 (s, 1H), 8.74 (d,  $J = 7.9$  Hz, 1H), 8.10 (d,  $J = 9.5$  Hz, 1H), 7.83 (dd,  $J = 9.5, 2.2$  Hz, 1H), 7.73 (d,  $J = 8.4$  Hz, 2H), 7.65 (d,  $J = 7.9$  Hz, 1H), 7.11 (d,  $J = 2.2$  Hz, 1H), 7.08 (d,  $J = 8.3$  Hz, 2H), 4.30 (s, 3H), 4.18 (s, 3H), 3.78 (dd,  $J = 5.9, 3.6$  Hz, 4H), 3.73 (dd,  $J = 5.9, 3.3$  Hz, 4H);  $^{13}\text{C}$  NMR (101 MHz,  $\text{DMSO-}d_6$ )  $\delta$  192.3, 155.7, 153.8, 151.1, 145.9, 144.4, 142.5, 132.9, 132.4, 131.3, 124.0, 122.0,

120.9, 117.2, 95.9, 66.2, 56.4, 47.2, 42.2. HRMS (ESI)  $m/z$  calcd for  $[C_{23}H_{24}N_3O_3]^+$   $[M-I]^+$ : 390.1813, found 390.1832.

**21. (Z)-2-(methoxy((4-nitrophenyl)imino)methyl)-1-methyl-7-morpholinoquinolin-1-ium iodide (4v)**

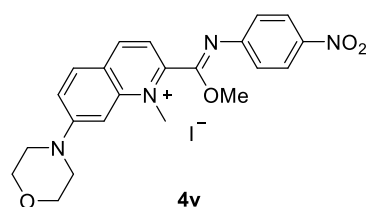

161 mg, 60% yield; Orange solid, m.p. = 181-183 °C;  $R_f$  = 0.3 ( $CH_2Cl_2:CH_3OH = 10:1$ ); IR (KBr,  $cm^{-1}$ ): 2978.72, 1664.91, 1631.55, 1562.26, 1505.81, 1336.45, 1236.38, 1169.66, 1108.08, 1033.66, 856.60.  $^1H$  NMR (400 MHz,  $DMSO-d_6$ )  $\delta$  8.75 (d,  $J = 7.9$  Hz, 1H), 8.10 (d,  $J = 9.5$  Hz, 1H), 8.06 (d,  $J = 8.9$  Hz, 2H), 7.83 (dd,  $J = 9.4, 2.2$  Hz, 1H), 7.67 (d,  $J = 7.9$  Hz, 1H), 7.12 (d,  $J = 8.9$  Hz, 2H), 7.10 (d,  $J = 2.0$  Hz, 1H), 4.28 (s, 3H), 4.18 (s, 3H), 3.79 – 3.76 (m, 4H), 3.75-3.70 (m, 4H);  $^{13}C$  NMR (101 MHz,  $DMSO-d_6$ )  $\delta$  154.6, 153.0, 150.7, 144.4, 143.4, 143.2, 141.5, 131.4, 124.4, 123.0, 121.3, 119.9, 116.1, 94.8, 65.2, 55.5, 46.2, 41.1. HRMS (ESI)  $m/z$  calcd for  $[C_{22}H_{23}N_4O_4]^+$   $[M-I]^+$ : 407.1714, found 407.1705.

**22. (Z)-2-((benzyloxy)((4-nitrophenyl)imino)methyl)-1-methyl-7-morpholinoquinolin-1-ium iodide (4w)**

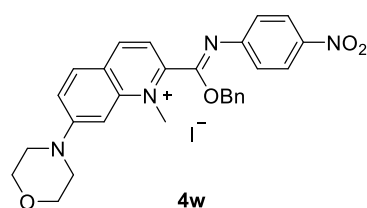

227 mg, 74% yield; Orange solid, m.p. = 130-132 °C;  $R_f$  = 0.3 ( $CH_2Cl_2:CH_3OH = 10:1$ ); IR (KBr,  $cm^{-1}$ ): 1672.60, 1628.98, 1559.70, 1508.38, 1339.02, 1236.38, 1108.08, 851.47.  $^1H$  NMR (400 MHz,  $DMSO-d_6$ )  $\delta$  8.75 (d,  $J = 7.9$  Hz, 1H), 8.12-8.07 (m, 3H), 7.83 (dd,  $J = 9.5, 2.2$  Hz, 1H), 7.69 (d,  $J = 7.9$  Hz, 1H), 7.64 – 7.59 (m, 2H), 7.49 – 7.42 (m, 3H), 7.16 (d,  $J = 8.9$  Hz, 2H), 7.10 (d,  $J = 2.1$  Hz, 1H), 5.82 – 5.50 (m, 2H), 4.32 (s, 3H), 3.79-3.75 (m, 4H), 3.75-3.71 (m, 4H);  $^{13}C$  NMR (101 MHz,  $DMSO-d_6$ )  $\delta$  155.6, 153.4, 151.7, 145.2, 144.5, 144.4, 142.7, 135.3, 132.4, 129.4, 129.2, 129.1, 125.5, 124.2, 122.5, 121.0, 117.2, 95.9, 71.1, 66.2, 47.3, 42.2. HRMS (ESI)  $m/z$  calcd for  $[C_{28}H_{27}N_4O_4]^+$   $[M-I]^+$ : 483.2027, found 483.2013.

**23. (Z)-2-(methoxy((4-(methoxycarbonyl)phenyl)imino)methyl)-1-methyl-7-morpholinoquinolin-1-ium iodide (4x)**

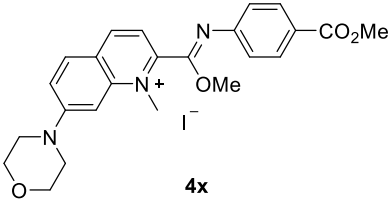

246 mg, 90% yield; Orange solid, m.p. = 207-209 °C;  $R_f = 0.3$  ( $\text{CH}_2\text{Cl}_2:\text{CH}_3\text{OH} = 10:1$ ); IR (KBr,  $\text{cm}^{-1}$ ): 3012.08, 2850.42, 1700.83, 1667.47, 1628.98, 1559.70, 1500.68, 1436.53, 1277.43, 1231.25, 1102.94, 951.55, 859.17, 771.92.  $^1\text{H}$  NMR (400 MHz,  $\text{DMSO}-d_6$ )  $\delta$  8.73 (d,  $J = 7.9$  Hz, 1H), 8.09 (d,  $J = 9.5$  Hz, 1H), 7.83 (dd,  $J = 9.5, 2.2$  Hz, 1H), 7.76 (d,  $J = 8.5$  Hz, 2H), 7.62 (d,  $J = 7.9$  Hz, 1H), 7.09 (d,  $J = 2.2$  Hz, 1H), 6.99 (d,  $J = 8.5$  Hz, 2H), 4.27 (s, 3H), 4.16 (s, 3H), 3.80-3.76 (m, 4H), 3.75 (s, 3H), 3.74-3.68 (m, 4H);  $^{13}\text{C}$  NMR (101 MHz,  $\text{DMSO}-d_6$ )  $\delta$  165.6, 155.2, 153.4, 149.6, 145.5, 144.0, 142.0, 131.9, 130.4, 125.5, 123.5, 121.2, 120.4, 116.8, 95.4, 65.8, 55.9, 54.9, 52.0, 46.7, 41.7, 13.2; HRMS (ESI)  $m/z$  calcd for  $[\text{C}_{24}\text{H}_{26}\text{N}_3\text{O}_4]^+ [\text{M}-\text{I}]^+$ : 420.1918, found 420.1909.

**24. (Z)-2-(((4-cyanophenyl)imino)(methoxy)methyl)-1-methyl-7-morpholinoquinolin-1-ium iodide (4y)**

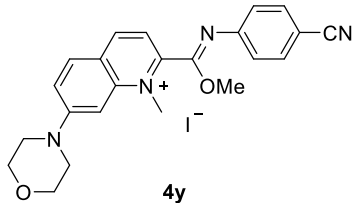

185 mg, 72% yield; Orange solid, m.p. = 199-201 °C;  $R_f = 0.3$  ( $\text{CH}_2\text{Cl}_2:\text{CH}_3\text{OH} = 10:1$ ); IR (KBr,  $\text{cm}^{-1}$ ): 3476.14, 2218.89, 1676.44, 1629.13, 1563.22, 1504.08, 1360.44, 1316.50, 1235.39, 1108.65, 951.49, 853.48.  $^1\text{H}$  NMR (400 MHz,  $\text{DMSO}-d_6$ )  $\delta$  8.75 (d,  $J = 7.9$  Hz, 1H), 8.10 (d,  $J = 9.5$  Hz, 1H), 7.84 (dd,  $J = 9.5, 2.2$  Hz, 1H), 7.66 (d,  $J = 8.4$  Hz, 2H), 7.63 (s, 1 H), 7.10 (d,  $J = 2.2$  Hz, 1H), 7.06 (d,  $J = 8.5$  Hz, 2H), 4.27 (s, 3H), 4.16 (s, 3H), 3.81 – 3.76 (m, 4H), 3.75-3.69 (m, 4H);  $^{13}\text{C}$  NMR (101 MHz,  $\text{DMSO}-d_6$ )  $\delta$  155.7, 154.0, 149.9, 145.6, 144.5, 142.5, 134.0, 132.4, 124.1, 122.5, 121.0, 119.1, 117.2, 107.3, 95.9, 66.2, 56.5, 47.3, 42.2. HRMS (ESI)  $m/z$  calcd for  $[\text{C}_{23}\text{H}_{23}\text{N}_4\text{O}_2]^+ [\text{M}-\text{I}]^+$ : 387.1816, found 387.1807.

**25. (Z)-2-(((4-chlorophenyl)imino)(methoxy)methyl)-1-methyl-7-morpholinoquinolin-1-ium iodide (4z)**

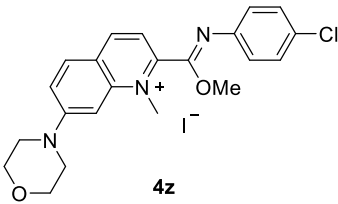

183 mg, 70% yield; Orange solid, m.p. = 155-157 °C;  $R_f = 0.3$  ( $\text{CH}_2\text{Cl}_2:\text{CH}_3\text{OH} = 10:1$ ); IR (KBr,  $\text{cm}^{-1}$ ): 2965.89, 2852.98, 1675.17, 1628.98, 1564.83, 1500.68, 1315.92, 1236.38, 1177.36, 846.34.  $^1\text{H}$  NMR (400 MHz,  $\text{DMSO}-d_6$ )  $\delta$  8.75 (d,  $J = 8.0$  Hz, 1H), 8.11 (d,  $J = 9.4$  Hz, 1H), 7.84 (dd,  $J = 9.5, 2.2$  Hz, 1H), 7.62

(d,  $J = 7.9$  Hz, 1H), 7.23 (d,  $J = 8.6$  Hz, 2H), 7.11 (d,  $J = 2.2$  Hz, 1H), 6.88 (d,  $J = 8.3$  Hz, 2H), 4.24 (s, 3H), 4.13 (s, 3H), 3.82-3.76 (m, 4H), 3.75-3.68 (m, 4H);  $^{13}\text{C}$  NMR (101 MHz, DMSO- $d_6$ )  $\delta$  155.7, 146.3, 144.4, 144.4, 142.4, 132.4, 129.6, 129.0, 123.90, 123.89, 123.2, 120.9, 117.3, 95.9, 66.2, 56.2, 47.2, 42.1. HRMS (ESI)  $m/z$  calcd for  $[\text{C}_{22}\text{H}_{23}\text{ClN}_3\text{O}_2]^+$   $[\text{M}-\text{I}]^+$ : 396.1473, found 396.1466.

**26. (Z)-2-(((4-bromophenyl)imino)(methoxy)methyl)-1-methyl-7-morpholinoquinolin-1-ium iodide (4aa)**

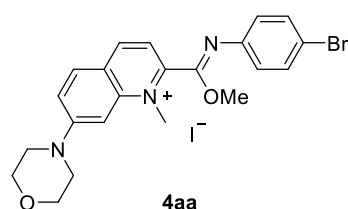

207 mg, 73% yield; Orange solid, m.p. = 187-189 °C;  $R_f = 0.3$  ( $\text{CH}_2\text{Cl}_2:\text{CH}_3\text{OH} = 10:1$ ); IR (KBr,  $\text{cm}^{-1}$ ): 2965.89, 2850.42, 1677.74, 1628.98, 1564.83, 1498.11, 1359.55, 1315.92, 1233.81, 1177.36, 1059.32, 846.34.  $^1\text{H}$  NMR

(400 MHz, DMSO- $d_6$ )  $\delta$  8.75 (d,  $J = 8.0$  Hz, 1H), 8.11 (d,  $J = 9.4$  Hz, 1H), 7.84 (dd,  $J = 9.5, 2.2$  Hz, 1H), 7.62 (d,  $J = 7.9$  Hz, 1H), 7.23 (d,  $J = 8.6$  Hz, 2H), 7.11 (d,  $J = 2.2$  Hz, 1H), 6.88 (d,  $J = 8.3$  Hz, 2H), 4.24 (s, 3H), 4.13 (s, 3H), 3.83-3.76 (m, 4H), 3.75-3.68 (m, 4H);  $^{13}\text{C}$  NMR (101 MHz, DMSO- $d_6$ )  $\delta$  155.7, 146.3, 144.44, 144.41, 142.4, 132.4, 129.6, 129.0, 123.90, 123.89, 123.2, 120.9, 117.3, 95.9, 66.2, 56.2, 47.2, 42.1. HRMS (ESI)  $m/z$  calcd for  $[\text{C}_{22}\text{H}_{23}\text{BrN}_3\text{O}_2]^+$   $[\text{M}-\text{I}]^+$ : 440.0968, found 440.0982.

**27. (Z)-2-(methoxy(phenylimino)methyl)-1-methyl-7-morpholinoquinolin-1-ium iodide (4ab)**

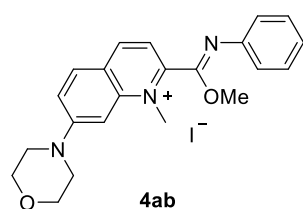

165 mg, 67% yield; Orange solid, m.p. = 151-153 °C;  $R_f = 0.3$  ( $\text{CH}_2\text{Cl}_2:\text{CH}_3\text{OH} = 10:1$ ); IR (KBr,  $\text{cm}^{-1}$ ): 1682.87, 1626.42, 1567.40, 1500.68, 1313.36, 1233.81, 1108.08.  $^1\text{H}$  NMR (400

MHz, DMSO- $d_6$ )  $\delta$  8.74 (d,  $J = 8.0$  Hz, 1H), 8.10 (d,  $J = 9.5$  Hz, 1H), 7.83 (dd,  $J = 9.5, 2.2$  Hz, 1H), 7.60 (d,  $J = 7.9$  Hz, 1H), 7.17 (t,  $J = 7.8$  Hz, 2H), 7.10 (d,  $J = 2.2$  Hz, 1H), 6.96 (t,  $J = 7.4$  Hz, 1H), 6.84 (d,  $J = 7.6$  Hz, 2H), 4.26 (s, 3H), 4.14 (s, 3H), 3.81-3.75 (m, 4H), 3.74-3.67 (m, 4H);  $^{13}\text{C}$  NMR (101 MHz, DMSO- $d_6$ )  $\delta$  155.6, 153.6, 146.7, 145.4, 144.4, 142.3, 132.4, 129.6, 124.9, 123.8, 121.3, 120.8, 117.4, 95.9, 66.2, 56.0, 47.2, 42.1. HRMS (ESI)  $m/z$  calcd for  $[\text{C}_{22}\text{H}_{24}\text{N}_3\text{O}_2]^+$   $[\text{M}-\text{I}]^+$ : 362.1863, found 362.1869.

**28. (Z)-2-(methoxy(p-tolylimino)methyl)-1-methyl-7-morpholinoquinolin-1-ium iodide (4ac)**

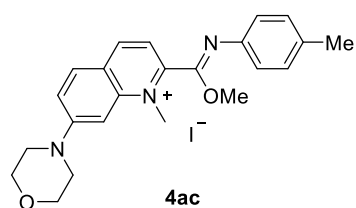

128 mg, 51% yield; Orange solid, m.p. = 150-152 °C;  $R_f$  = 0.3 ( $\text{CH}_2\text{Cl}_2:\text{CH}_3\text{OH} = 10:1$ ); IR (KBr,  $\text{cm}^{-1}$ ): 1672.60, 1631.55, 1564.83, 1500.68, 1310.79, 1233.81, 1108.08.  $^1\text{H}$  NMR (400 MHz,  $\text{DMSO-}d_6$ )  $\delta$  8.74 (d,  $J = 8.0$  Hz, 1H), 8.11 (d,  $J = 9.5$  Hz, 1H), 7.83 (dd,  $J = 9.4, 2.2$  Hz, 1H), 7.58 (d,  $J = 8.0$  Hz, 1H), 7.11 (d,  $J = 2.2$  Hz, 1H), 6.97 (d,  $J = 8.0$  Hz, 2H), 6.72 (d,  $J = 8.2$  Hz, 2H), 4.25 (s, 3H), 4.12 (s, 3H), 3.81 – 3.76 (m, 4H), 3.75-3.67 (m, 4H), 2.13 (s, 3H);  $^{13}\text{C}$  NMR (101 MHz,  $\text{DMSO-}d_6$ )  $\delta$  155.6, 153.4, 147.0, 144.4, 142.8, 142.3, 133.8, 132.4, 130.1, 123.8, 121.2, 120.8, 117.4, 96.0, 66.2, 55.9, 47.2, 42.1, 20.8. HRMS (ESI)  $m/z$  calcd for  $[\text{C}_{23}\text{H}_{26}\text{N}_3\text{O}_2]^+$   $[\text{M-I}]^+$ : 376.2020, found 376.2033.

**29. (Z)-7-(diethylamino)-2-(((4-formylphenyl)imino)(methoxy)methyl)-1-methylquinolin-1-ium iodide (4ad)**

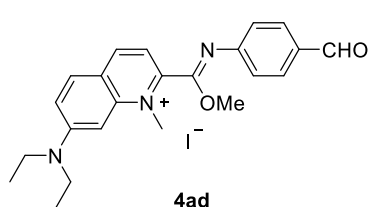

163 mg, 61% yield; Orange solid, m.p. = 134-136 °C;  $R_f$  = 0.3 ( $\text{CH}_2\text{Cl}_2:\text{CH}_3\text{OH} = 10:1$ ); IR (KBr,  $\text{cm}^{-1}$ ): 3635.62, 2971.02, 1680.30, 1628.98, 1559.70, 1510.94, 1354.42, 1315.92, 1262.04, 1159.40, 1049.06, 820.68.  $^1\text{H}$  NMR (400 MHz,  $\text{DMSO-}d_6$ )  $\delta$  9.82 (s, 1H), 8.63 (d,  $J = 7.8$  Hz, 1H), 8.02 (d,  $J = 9.5$  Hz, 1H), 7.74 (d,  $J = 8.4$  Hz, 2H), 7.61 (dd,  $J = 9.5, 2.2$  Hz, 1H), 7.48 (d,  $J = 7.9$  Hz, 1H), 7.08 (d,  $J = 8.3$  Hz, 2H), 6.76 (d,  $J = 2.2$  Hz, 1H), 4.26 (s, 3H), 4.17 (s, 3H), 3.68 (q,  $J = 7.0$  Hz, 4H), 1.22 (t,  $J = 7.0$  Hz, 6H);  $^{13}\text{C}$  NMR (101 MHz,  $\text{DMSO-}d_6$ )  $\delta$  192.3, 154.0, 153.8, 151.3, 145.2, 143.7, 142.6, 132.9, 132.6, 131.3, 123.4, 122.0, 120.4, 115.9, 93.4, 56.3, 45.4, 41.8, 12.5. HRMS (ESI)  $m/z$  calcd for  $[\text{C}_{23}\text{H}_{26}\text{N}_3\text{O}_2]^+$   $[\text{M-I}]^+$ : 376.2020, found 376.2033.

**30. (Z)-7-(diethylamino)-2-(methoxy((4-nitrophenyl)imino)methyl)-1-methylquinolin-1-ium iodide (4ae)**

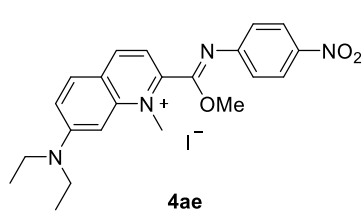

192 mg, 74% yield; Orange solid, m.p. = 139-141 °C;  $R_f$  = 0.3 (CH<sub>2</sub>Cl<sub>2</sub>:CH<sub>3</sub>OH = 10:1); IR (KBr, cm<sup>-1</sup>): 2973.58, 1672.60, 1628.98, 1557.13, 1510.94, 1336.45, 1313.36, 1259.47, 1167.09, 1102.94, 854.04. <sup>1</sup>H NMR (400 MHz,

DMSO-*d*<sub>6</sub>) δ 8.65 (d, *J* = 7.9 Hz, 1H), 8.08 (d, *J* = 9.0 Hz, 2H), 8.03 (d, *J* = 9.5 Hz, 1H), 7.63 (dd, *J* = 9.5, 2.2 Hz, 1H), 7.52 (d, *J* = 7.8 Hz, 1H), 7.13 (d, *J* = 9.0 Hz, 2H), 6.76 (d, *J* = 2.1 Hz, 1H), 4.25 (s, 3H), 4.18 (s, 3H), 3.69 (q, *J* = 7.0 Hz, 4H), 1.22 (t, *J* = 7.0 Hz, 6H); <sup>13</sup>C NMR (101 MHz, DMSO-*d*<sub>6</sub>) δ 153.2, 152.7, 150.9, 143.7, 143.2, 142.7, 141.7, 131.6, 124.4, 122.4, 121.3, 119.4, 114.8, 92.3, 55.5, 44.3, 40.7, 11.5. HRMS (ESI) *m/z* calcd for [C<sub>22</sub>H<sub>25</sub>N<sub>4</sub>O<sub>3</sub>]<sup>+</sup> [M-I]<sup>+</sup>: 393.1921, found 393.1913.

**31. (Z)-2-((benzyloxy)((4-(methoxycarbonyl)phenyl)imino)methyl)-7-(diethylamino)-1-methylquinolin-1-ium iodide (4af)**

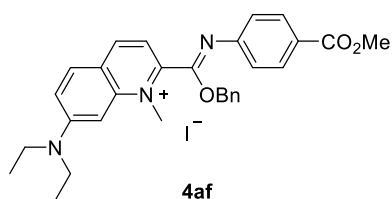

215 mg, 71% yield; Orange solid, m.p. = 112-114 °C;  $R_f$  = 0.3 (CH<sub>2</sub>Cl<sub>2</sub>:CH<sub>3</sub>OH = 10:1); IR (KBr, cm<sup>-1</sup>): 2976.15, 1716.23, 1631.55, 1559.70, 1510.94, 1274.87, 1164.53, 1100.38. <sup>1</sup>H NMR (400 MHz,

DMSO-*d*<sub>6</sub>) δ 8.62 (d, *J* = 7.8 Hz, 1H), 8.02 (d, *J* = 9.5 Hz, 1H), 7.80 (d, *J* = 8.6 Hz, 2H), 7.64-7.58 (m, 3H), 7.48 (s, 1H), 7.46 (s, 1H), 7.45 – 7.41 (m, 2H), 7.05 – 7.00 (m, 2H), 6.76 (d, *J* = 2.2 Hz, 1H), 5.62 (s, 2H), 4.27 (s, 3H), 3.76 (s, 3H), 3.68 (q, *J* = 7.2 Hz, 4H), 1.21 (t, *J* = 7.0 Hz, 6H); <sup>13</sup>C NMR (101 MHz, DMSO-*d*<sub>6</sub>) δ 166.1, 153.7, 153.3, 150.1, 145.1, 143.7, 142.7, 135.5, 132.6, 130.9, 129.4, 129.1, 129.1, 126.0, 123.4, 121.7, 120.4, 116.0, 93.4, 70.7, 52.5, 45.4, 41.8, 12.5. HRMS (ESI) *m/z* calcd for [C<sub>30</sub>H<sub>32</sub>N<sub>3</sub>O<sub>3</sub>]<sup>+</sup> [M-I]<sup>+</sup>: 482.2438, found 482.2421.

**32. (Z)-7-(diethylamino)-2-(methoxy((4-(methoxycarbonyl)phenyl)imino)methyl)-1-methylquinolin-1-ium iodide (4ag)**

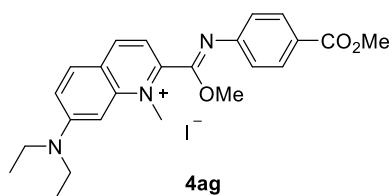

155 mg, 58% yield; Orange solid, m.p. = 147-149 °C;  $R_f$  = 0.3 (CH<sub>2</sub>Cl<sub>2</sub>:CH<sub>3</sub>OH = 10:1); IR (KBr, cm<sup>-1</sup>): 2976.15, 1713.66, 1631.55, 1559.70, 1510.94, 1313.36, 1274.87, 1167.09, 1097.81. <sup>1</sup>H NMR (400

MHz, DMSO-*d*<sub>6</sub>) δ 8.62 (d, *J* = 7.9 Hz, 1H), 8.02 (d, *J* = 9.5 Hz, 1H), 7.77 (d, *J* = 8.6 Hz, 2H), 7.61 (dd, *J* = 9.5, 2.2 Hz, 1H), 7.46 (d, *J* = 7.9 Hz, 1H), 6.99 (d, *J* = 8.5 Hz, 2H), 6.75 (d, *J* = 2.2 Hz, 1H), 4.23 (s, 3H), 4.15 (s, 3H), 3.75 (s, 3H), 3.68 (q, *J* = 6.9 Hz, 4H), 1.22 (t, *J* = 7.0 Hz, 6H); <sup>13</sup>C NMR (101 MHz, DMSO-*d*<sub>6</sub>) δ 166.1, 154.1, 153.7, 150.2, 145.3, 143.7, 142.6, 132.6, 130.9, 125.9, 123.3, 121.7, 120.4, 115.9, 93.4, 56.3, 52.5, 45.4, 41.8, 12.5. HRMS (ESI) *m/z* calcd for [C<sub>24</sub>H<sub>28</sub>N<sub>3</sub>O<sub>3</sub>]<sup>+</sup> [M-I]<sup>+</sup>: 406.2125, found 406.2105.

**33. (Z)-2-(((4-cyanophenyl)imino)(methoxy)methyl)-7-(diethylamino)-1-methylquinolin-1-ium iodide (4ah)**

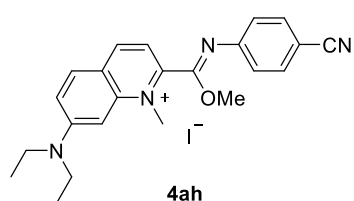

188 mg, 75% yield; Orange solid, m.p. = 151-153 °C; *R*<sub>f</sub> = 0.3 (CH<sub>2</sub>Cl<sub>2</sub>:CH<sub>3</sub>OH = 10:1); IR (KBr, cm<sup>-1</sup>): 3425.45, 2974.25, 2223.96, 1671.37, 1632.50, 1559.84, 1512.52, 1309.74, 1264.12, 1164.41, 858.55. <sup>1</sup>H NMR (400 MHz, DMSO-*d*<sub>6</sub>) δ 8.66 (d, *J* = 7.8 Hz, 1H), 8.05 (d, *J* = 9.6 Hz, 1H), 7.68 (d, *J* = 8.6 Hz, 2H), 7.64 (dd, *J* = 9.5, 2.2 Hz, 1H), 7.50 (d, *J* = 7.9 Hz, 1H), 7.08 (d, *J* = 8.5 Hz, 2H), 6.77 (d, *J* = 2.2 Hz, 1H), 4.25 (s, 3H), 4.16 (s, 3H), 3.70 (q, *J* = 7.1 Hz, 4H), 1.23 (t, *J* = 7.0 Hz, 6H); <sup>13</sup>C NMR (101 MHz, DMSO-*d*<sub>6</sub>) δ 154.2, 153.8, 150.0, 144.9, 143.7, 142.7, 134.0, 132.7, 123.5, 122.5, 120.5, 119.1, 115.9, 107.2, 93.4, 56.4, 45.4, 41.9, 12.5. HRMS (ESI) *m/z* calcd for [C<sub>23</sub>H<sub>25</sub>N<sub>4</sub>O]<sup>+</sup> [M-I]<sup>+</sup>: 373.2023, found 373.2023.

**34. (Z)-2-(((4-chlorophenyl)imino)(methoxy)methyl)-7-(diethylamino)-1-methylquinolin-1-ium iodide (4ai)**

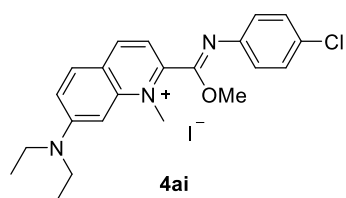

187 mg, 71% yield; Orange solid, m.p. = 118-120 °C; *R*<sub>f</sub> = 0.3 (CH<sub>2</sub>Cl<sub>2</sub>:CH<sub>3</sub>OH = 10:1); IR (KBr, cm<sup>-1</sup>): 2971.02, 2924.83, 1672.60, 1628.98, 1562.26, 1508.38, 1310.79, 1264.60, 1156.83, 1074.72, 833.51. <sup>1</sup>H NMR (400 MHz, DMSO-*d*<sub>6</sub>) δ 8.66 (d, *J* = 7.9 Hz, 1H), 8.05 (d, *J* = 9.5 Hz, 1H), 7.63 (dd, *J* = 9.5, 2.2 Hz, 1H), 7.46 (d, *J* = 7.8 Hz, 1H), 7.24 (d, *J* = 8.6 Hz, 2H), 6.89 (d, *J* = 8.6 Hz, 2H), 6.77 (d, *J* = 2.2 Hz, 1H), 4.22 (s, 3H), 4.13 (s, 3H), 3.69 (q, *J* = 7.2 Hz, 4H), 1.22 (t, *J* = 7.0 Hz, 6H); <sup>13</sup>C NMR (101 MHz, DMSO-*d*<sub>6</sub>) δ 154.2, 153.8, 145.6, 144.6, 143.7, 142.7, 132.7, 129.6, 129.0, 123.3, 123.2, 120.4, 116.0, 93.4, 56.1, 45.4, 41.8, 12.5.

HRMS (ESI)  $m/z$  calcd for  $[C_{22}H_{25}ClN_3O]^+$   $[M-I]^+$ : 382.1681, found 382.1665.

**35. (Z)-2-(((4-bromophenyl)imino)(methoxy)methyl)-7-(diethylamino)-1-methylquinolin-1-ium iodide (4aj)**

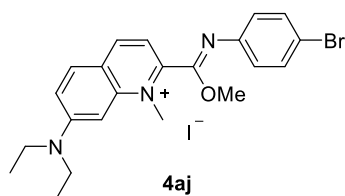

224 mg, 81% yield; Orange solid, m.p. = 142-144 °C;  $R_f$  = 0.3 ( $CH_2Cl_2:CH_3OH = 10:1$ ); IR (KBr,  $cm^{-1}$ ): 2976.15, 1670.04, 1628.98, 1562.26, 1513.51, 1349.28, 1313.36, 1259.47, 1167.09, 1072.15, 854.04.  $^1H$  NMR (400 MHz,

$DMSO-d_6$ )  $\delta$  8.65 (d,  $J = 7.9$  Hz, 1H), 8.05 (d,  $J = 9.5$  Hz, 1H), 7.63 (dd,  $J = 9.5, 2.2$  Hz, 1H), 7.45 (d,  $J = 7.9$  Hz, 1H), 7.36 (d,  $J = 8.6$  Hz, 2H), 6.83 (d,  $J = 8.5$  Hz, 2H), 6.77 (d,  $J = 2.2$  Hz, 1H), 4.22 (s, 3H), 4.13 (s, 3H), 3.69 (q,  $J = 7.4$  Hz, 4H), 1.22 (t,  $J = 7.0$  Hz, 6H);  $^{13}C$  NMR (101 MHz,  $DMSO-d_6$ )  $\delta$  154.1, 153.7, 145.6, 145.0, 143.7, 142.6, 132.6, 132.5, 123.6, 123.3, 120.4, 117.1, 116.0, 93.4, 56.1, 45.4, 41.8, 12.5. HRMS (ESI)  $m/z$  calcd for  $[C_{22}H_{25}BrN_3O]^+$   $[M-I]^+$ : 426.1176, found 426.1170.

**36. (Z)-7-(diethylamino)-2-(methoxy(phenylimino)methyl)-1-methylquinolin-1-ium iodide (4ak)**

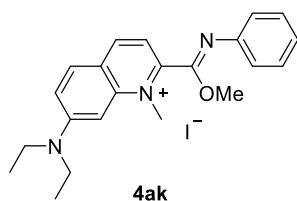

156 mg, 66% yield; Orange solid, m.p. = 172-174 °C;  $R_f$  = 0.3 ( $CH_2Cl_2:CH_3OH = 10:1$ ); IR (KBr,  $cm^{-1}$ ): 2968.45, 2927.40, 1672.60, 1631.55, 1559.70, 1513.51, 1349.28, 1313.92, 1262.04, 1167.09, 1051.62, 851.47.  $^1H$  NMR (400 MHz,  $DMSO-d_6$ )  $\delta$  8.62 (d,  $J = 7.9$  Hz, 1H), 8.03 (d,  $J = 9.5$  Hz, 1H), 7.61 (dd,  $J = 9.5, 2.1$  Hz, 1H), 7.43 (d,  $J = 7.8$  Hz, 1H), 7.26 – 7.11 (m, 2H), 6.98 (d,  $J = 7.6$  Hz, 1H), 6.90 – 6.81 (m, 2H), 6.76 (d,  $J = 2.4$  Hz, 1H), 4.22 (s, 3H), 4.13 (s, 3H), 3.68 (q,  $J = 7.2$  Hz, 4H), 1.21 (t,  $J = 6.9$  Hz, 6H);  $^{13}C$  NMR (101 MHz,

$DMSO-d_6$ )  $\delta$  153.7, 146.1, 145.6, 143.6, 142.5, 132.6, 130.1, 129.6, 124.8, 123.2, 121.3, 120.3, 116.1, 93.4, 55.9, 45.4, 41.8, 12.5. HRMS (ESI)  $m/z$  calcd for  $[C_{22}H_{26}N_3O]^+$   $[M-I]^+$ : 348.2070, found 348.2080.

**37. (Z)-7-(4-(tert-butoxycarbonyl)piperazin-1-yl)-2-(((4-formylphenyl)imino)(methoxy)methyl)-1-methylquinolin-1-ium iodide (4al)**



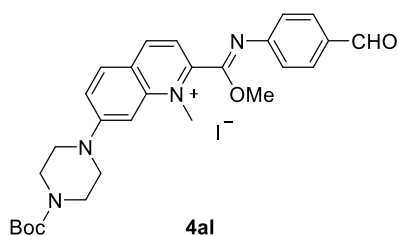

239 mg, 78% yield; Orange solid, m.p. = 158-160 °C;  $R_f = 0.3$  ( $\text{CH}_2\text{Cl}_2:\text{CH}_3\text{OH} = 10:1$ ); IR (KBr,  $\text{cm}^{-1}$ ): 2978.72, 1688.00, 1631.55, 1562.26, 1408.30, 1315.92, 1226.11, 1161.96, 1077.28, 856.60.  $^1\text{H}$  NMR (400 MHz,  $\text{DMSO}-d_6$ )  $\delta$  9.80 (s, 1H), 8.72 (d,  $J = 7.9$  Hz, 1H), 8.08 (d,  $J = 9.5$  Hz, 1H), 7.79 (dd,  $J = 9.6, 2.1$  Hz, 1H), 7.73 (d,  $J = 8.4$  Hz, 2H), 7.63 (d,  $J = 7.9$  Hz, 1H), 7.12 – 7.04 (m, 3H), 4.28 (s, 3H), 4.17 (s, 3H), 3.78 (dd,  $J = 7.0, 3.9$  Hz, 4H), 3.53 (dd,  $J = 6.3, 4.2$  Hz, 4H), 1.44 (s, 9H);  $^{13}\text{C}$  NMR (101 MHz,  $\text{DMSO}-d_6$ )  $\delta$  192.3, 155.3, 154.3, 153.8, 151.1, 145.8, 144.4, 142.5, 132.9, 132.5, 131.3, 123.9, 122.0, 121.0, 117.1, 95.7, 79.8, 56.5, 56.4, 46.6, 42.2, 28.5. HRMS (ESI)  $m/z$  calcd for  $[\text{C}_{28}\text{H}_{33}\text{N}_4\text{O}_4]^+ [\text{M}-\text{I}]^+$ : 489.2496, found 489.2491.

**38. (Z)-7-(4-(tert-butoxycarbonyl)piperazin-1-yl)-2-(methoxy((4-nitrophenyl)imino)methyl)-1-methylquinolin-1-ium iodide (4am)**

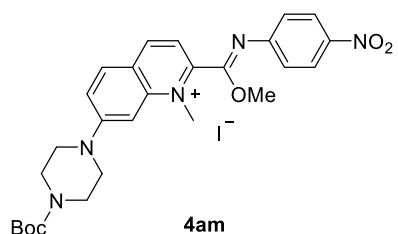

241 mg, 76% yield; Orange solid, m.p. = 152-154 °C;  $R_f = 0.3$  ( $\text{CH}_2\text{Cl}_2:\text{CH}_3\text{OH} = 10:1$ ); IR (KBr,  $\text{cm}^{-1}$ ): 2973.58, 1682.87, 1628.98, 1559.70, 1508.38, 1408.30, 1336.45, 1228.68, 1169.66, 846.34.  $^1\text{H}$  NMR (400 MHz,  $\text{DMSO}-d_6$ )  $\delta$  8.73 (d,  $J = 8.0$  Hz, 1H), 8.09 (d,  $J = 9.6$  Hz, 1H), 8.06 (d,  $J = 9.0$  Hz, 2H), 7.80 (dd,  $J = 9.5, 2.2$  Hz, 1H), 7.65 (d,  $J = 7.9$  Hz, 1H), 7.12 (d,  $J = 8.9$  Hz, 2H), 7.05 (d,  $J = 2.2$  Hz, 1H), 4.27 (s, 3H), 4.18 (s, 3H), 3.83-3.75 (m, 4H), 3.56 – 3.48 (m, 4H), 1.43 (s, 9H);  $^{13}\text{C}$  NMR (101 MHz,  $\text{DMSO}-d_6$ )  $\delta$  155.3, 154.3, 154.1, 151.8, 145.4, 144.5, 144.3, 142.6, 132.5, 125.5, 124.0, 122.4, 121.1, 117.0, 95.8, 79.8, 56.6, 55.4, 46.6, 42.2, 28.5. HRMS (ESI)  $m/z$  calcd for  $[\text{C}_{27}\text{H}_{32}\text{N}_5\text{O}_5]^+ [\text{M}-\text{I}]^+$ : 506.2398, found 506.2391.

**39. (Z)-7-(4-(tert-butoxycarbonyl)piperazin-1-yl)-2-(methoxy((4-methoxycarbonyl)phenyl)imino)methyl)-1-methylquinolin-1-ium iodide (4an)**

262 mg, 81% yield; Orange solid, m.p. = 143-145 °C;  $R_f = 0.3$  ( $\text{CH}_2\text{Cl}_2:\text{CH}_3\text{OH} = 10:1$ ); IR (KBr,  $\text{cm}^{-1}$ ): 3427.77, 2971.02, 1685.43, 1628.98, 1559.70, 1498.11, 1408.30,

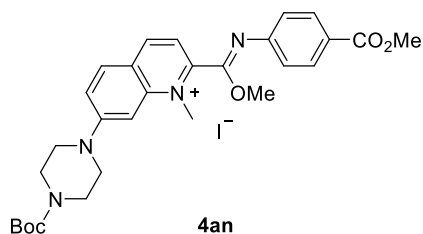

4an

1359.55, 1274.87, 1223.55, 1164.53, 1113.21, 856.60, 774.49.  $^1\text{H}$  NMR (400 MHz,  $\text{DMSO-}d_6$ )  $\delta$  8.72 (d,  $J$  = 8.0 Hz, 1H), 8.09 (d,  $J$  = 9.5 Hz, 1H), 7.80 (dd,  $J$  = 9.5, 2.2 Hz, 1H), 7.76 (d,  $J$  = 8.5 Hz, 2H), 7.61 (d,  $J$  = 7.9 Hz, 1H), 7.06 (d,  $J$  = 2.2 Hz, 1H), 6.99 (d,  $J$  = 8.6 Hz, 2H), 4.27 (s, 3H), 4.17 (s, 3H), 3.82 – 3.76 (m, 4H), 3.75 (s, 3H), 3.58-3.49 (m, 4H), 1.44 (s, 9H);  $^{13}\text{C}$  NMR (101 MHz,  $\text{DMSO-}d_6$ )  $\delta$  166.1, 155.3, 154.3, 153.9, 150.0, 145.9, 144.4, 142.5, 132.5, 130.9, 125.9, 123.8, 121.6, 121.0, 117.1, 95.8, 79.8, 56.5, 56.4, 52.5, 46.6, 42.2, 28.5. HRMS (ESI)  $m/z$  calcd for  $[\text{C}_{29}\text{H}_{35}\text{N}_4\text{O}_5]^+$   $[\text{M-I}]^+$ : 519.2602, found 519.2604.

**40. (Z)-7-(4-(tert-butoxycarbonyl)piperazin-1-yl)-2-(((4-cyanophenyl)imino)(methoxy)methyl)-1-methylquinolin-1-ium iodide (4ao)**

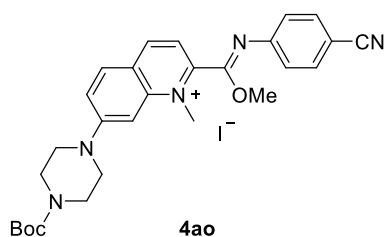

4ao

215 mg, 70% yield; Orange solid, m.p. = 162-164 °C;  $R_f$  = 0.3 ( $\text{CH}_2\text{Cl}_2:\text{CH}_3\text{OH}$  = 10:1); IR (KBr,  $\text{cm}^{-1}$ ): 3443.89, 2924.40, 2223.43, 1685.64, 1629.03, 1562.43, 1410.91, 1316.00, 1224.43, 1166.15, 856.46.  $^1\text{H}$  NMR (400 MHz,  $\text{DMSO-}d_6$ )  $\delta$  8.73 (d,  $J$  = 8.0 Hz, 1H), 8.10 (d,  $J$  = 9.6 Hz, 1H), 7.80 (dd,  $J$  = 9.5, 2.2 Hz, 1H), 7.66 (d,  $J$  = 8.5 Hz, 2H), 7.62 (d,  $J$  = 7.9 Hz, 1H), 7.09 – 7.02 (m, 3H), 4.26 (s, 3H), 4.16 (s, 3H), 3.83-3.75 (m, 4H), 3.56 – 3.50 (m, 4H), 1.43 (s, 9H);  $^{13}\text{C}$  NMR (101 MHz,  $\text{DMSO-}d_6$ )  $\delta$  155.3, 154.3, 154.0, 149.9, 145.5, 144.4, 142.5, 134.0, 132.5, 123.9, 122.4, 121.1, 119.1, 117.0, 107.3, 95.7, 79.8, 56.5, 46.6, 42.2, 39.7, 28.5. HRMS (ESI)  $m/z$  calcd for  $[\text{C}_{28}\text{H}_{32}\text{N}_5\text{O}_3]^+$   $[\text{M-I}]^+$ : 486.2500, found 486.2486.

**41. (Z)-7-(4-(tert-butoxycarbonyl)piperazin-1-yl)-2-(((4-chlorophenyl)imino)(methoxy)methyl)-1-methylquinolin-1-ium iodide (4ap)**

186 mg, 60% yield; Orange solid, m.p. = 170-172 °C;  $R_f$  = 0.3 ( $\text{CH}_2\text{Cl}_2:\text{CH}_3\text{OH}$  = 10:1); IR (KBr,  $\text{cm}^{-1}$ ): 2922.26, 1680.30, 1628.98, 1562.26, 1498.11, 1413.43, 1310.79, 1223.55, 1164.53, 833.51.  $^1\text{H}$  NMR (400 MHz,  $\text{DMSO-}d_6$ )  $\delta$  8.74 (d,  $J$  = 8.0 Hz, 1H),

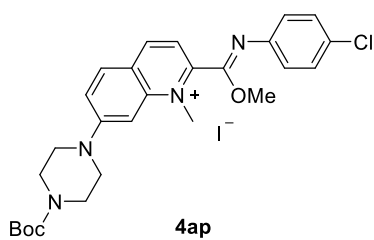

8.10 (d,  $J = 9.5$  Hz, 1H), 7.80 (dd,  $J = 9.4, 2.1$  Hz, 1H), 7.60 (d,  $J = 7.9$  Hz, 1H), 7.22 (d,  $J = 8.6$  Hz, 2H), 7.06 (d,  $J = 2.2$  Hz, 1H), 6.88 (d,  $J = 8.6$  Hz, 2H), 4.24 (s, 3H), 4.13 (s, 3H), 3.84-3.74 (m, 4H), 3.57 – 3.50 (m, 4H), 1.43 (s, 9H);  $^{13}\text{C}$  NMR (101 MHz,

DMSO- $d_6$ )  $\delta$  155.2, 154.3, 154.0, 146.2, 144.43, 144.37, 142.5, 132.5, 129.6, 129.0, 123.8, 123.2, 121.0, 117.2, 95.8, 79.8, 56.2, 46.6, 42.1, 39.7, 28.5. HRMS (ESI)  $m/z$  calcd for  $[\text{C}_{27}\text{H}_{32}\text{ClN}_4\text{O}_3]^+$   $[\text{M}-\text{I}]^+$ : 495.2157, found 495.2166.

#### 42. (Z)-2-(((4-bromophenyl)imino)(methoxy)methyl)-7-(4-(tert-butoxycarbonyl)piperazin-1-yl)-1-methylquinolin-1-ium iodide (4aq)

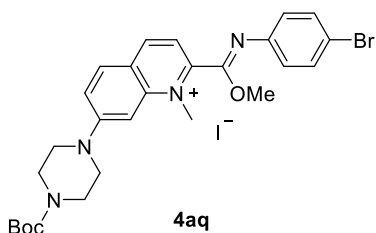

204 mg, 61% yield; Orange solid, m.p. = 148-150 °C;  $R_f = 0.3$  ( $\text{CH}_2\text{Cl}_2:\text{CH}_3\text{OH} = 10:1$ ); IR (KBr,  $\text{cm}^{-1}$ ): 2947.92, 1716.23, 1628.98, 1505.81, 1313.36, 1274.87, 1223.55, 1172.23, 1108.08, 956.68, 851.47, 764.23.  $^1\text{H}$  NMR (400 MHz, DMSO- $d_6$ )  $\delta$  8.74 (d,  $J = 8.0$  Hz, 1H),

8.11 (d,  $J = 9.5$  Hz, 1H), 7.80 (dd,  $J = 9.5, 2.2$  Hz, 1H), 7.60 (d,  $J = 7.9$  Hz, 1H), 7.35 (d,  $J = 8.6$  Hz, 2H), 7.06 (d,  $J = 2.3$  Hz, 1H), 6.82 (d,  $J = 8.6$  Hz, 2H), 4.24 (s, 3H), 4.13 (s, 3H), 3.85-3.74 (m, 4H), 3.57 – 3.48 (m, 4H), 1.43 (s, 9H);  $^{13}\text{C}$  NMR (101 MHz, DMSO- $d_6$ )  $\delta$  155.2, 154.3, 153.9, 149.0, 146.2, 144.8, 144.4, 142.4, 132.5, 132.5, 123.8, 123.6, 121.0, 117.2, 95.8, 79.8, 56.2, 46.6, 42.1, 39.7, 28.5. HRMS (ESI)  $m/z$  calcd for  $[\text{C}_{27}\text{H}_{32}\text{BrN}_4\text{O}_3]^+$   $[\text{M}-\text{I}]^+$ : 539.1652, found 539.1659.

#### General procedure for the synthesis of amides

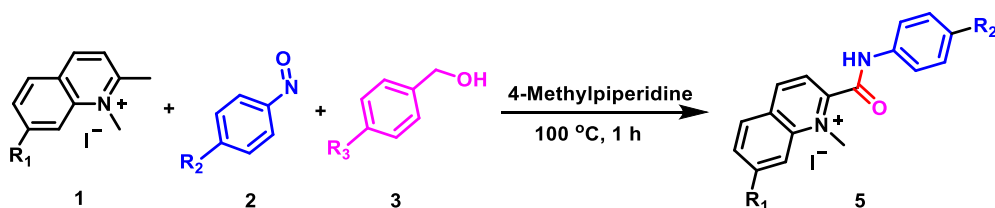

Compound **1** (0.5 mmol, 1.0 equiv) was dissolved in solvent **3** (20 mL) and 4-methylpiperidine (59  $\mu\text{L}$ , 1.0 equiv) was added to the mixture at 100 °C, then the mixture was stirred at 100 °C for 5 min. Compound **2** was added to the mixture and

stirred at 100 °C for 1 h. After the solvent was removed *in vacuum*, the crude product was purified by flash chromatography (CH<sub>2</sub>Cl<sub>2</sub>/CH<sub>3</sub>OH = 80/1) to obtain desired product **5** as a red solid.

## Analysis data of imidate products

### 1. 2-((4-formylphenyl)carbamoyl)-1-methyl-7-(4-methylpiperidin-1-yl)quinolin-1-ium iodide (**5a**)

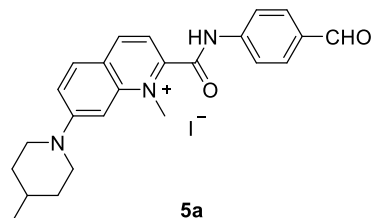

205 mg, 80%, 111 mg, 43%, 145 mg, 56% yield; Orange solid, m.p. = 201-203 °C;  $R_f = 0.3$  (CH<sub>2</sub>Cl<sub>2</sub>:CH<sub>3</sub>OH = 10:1); IR (KBr, cm<sup>-1</sup>): 2984.87, 2915.92, 2846.98, 1682.08, 1629.77, 1591.74, 1534.68, 1501.40, 1358.75, 1318.34, 1261.28, 1220.87, 1163.81, 966.49. <sup>1</sup>H NMR (400 MHz, DMSO-*d*<sub>6</sub>)  $\delta$  11.65 (s, 1H), 9.98 (s, 1H), 8.88 (d,  $J = 7.9$  Hz, 1H), 8.17 (d,  $J = 9.5$  Hz, 1H), 8.02 (d,  $J = 8.6$  Hz, 2H), 7.96 (d,  $J = 8.6$  Hz, 2H), 7.89 (dd,  $J = 9.6, 2.2$  Hz, 1H), 7.80 (d,  $J = 7.9$  Hz, 1H), 7.15 (d,  $J = 2.2$  Hz, 1H), 4.40 (d,  $J = 13.6$  Hz, 2H), 4.28 (s, 3H), 3.21 (t,  $J = 12.4$  Hz, 2H), 1.88-1.73 (m, 3H), 1.27-1.14 (m, 2H), 0.95 (d,  $J = 6.0$  Hz, 3H); <sup>13</sup>C NMR (101 MHz, DMSO-*d*<sub>6</sub>)  $\delta$  192.3, 160.7, 155.3, 149.2, 144.5, 143.3, 142.8, 133.3, 132.5, 131.4, 123.8, 121.0, 120.6, 115.2, 95.2, 47.9, 41.49, 34.0, 30.7, 22.0. HRMS (ESI)  $m/z$  calcd for [C<sub>24</sub>H<sub>26</sub>N<sub>3</sub>O<sub>2</sub>]<sup>+</sup> [M-I]<sup>+</sup>: 388.2020, found 388.2036.

### 2. 2-((4-(methoxycarbonyl)phenyl)carbamoyl)-1-methyl-7-(4-methylpiperidin-1-yl)quinolin-1-ium iodide (**5b**)

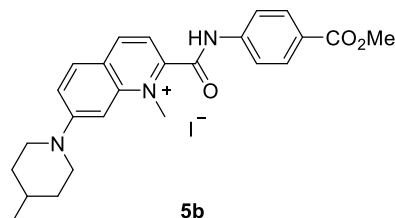

179 mg, 66% yield; Orange solid, m.p. = 159-161 °C;  $R_f = 0.3$  (CH<sub>2</sub>Cl<sub>2</sub>:CH<sub>3</sub>OH = 10:1); IR (KBr, cm<sup>-1</sup>): 2947.92, 1716.23, 1628.98, 1508.38, 1405.74, 1280.00, 1226.11, 1108.08, 959.25, 848.91, 764.23. <sup>1</sup>H NMR (400 MHz, DMSO-*d*<sub>6</sub>)  $\delta$  11.60 (s, 1H), 8.88 (d,  $J = 7.9$  Hz, 1H), 8.17 (d,  $J = 9.6$  Hz, 1H), 8.06 (d,  $J = 8.7$  Hz, 2H), 7.93-7.85 (m, 3H), 7.80 (d,  $J = 7.9$  Hz, 1H), 7.15 (d,  $J = 2.2$  Hz, 1H), 4.40 (d,  $J = 13.5$  Hz, 2H), 4.28 (s, 3H), 3.86 (s, 3H), 3.20 (t,  $J = 11.7$  Hz, 2H), 1.86-1.76 (m, 3H), 1.27-1.13 (m, 2H), 0.95 (d,  $J = 6.0$  Hz, 3H); <sup>13</sup>C NMR (101 MHz, DMSO-*d*<sub>6</sub>)  $\delta$  166.1, 160.6, 155.4, 149.3,

144.6, 142.8, 142.3, 132.5, 131.0, 126.3, 123.8, 121.0, 120.3, 115.2, 95.3, 52.6, 47.9, 41.4, 34.0, 30.7, 22.0. HRMS (ESI)  $m/z$  calcd for  $[C_{25}H_{28}N_3O_3]^+$   $[M-I]^+$ : 418.2126, found 418.2113.

### 3. 2-((4-(methoxycarbonyl)phenyl)carbamoyl)-1-methyl-7-morpholinoquinolin-1-ium iodide (**5c**)

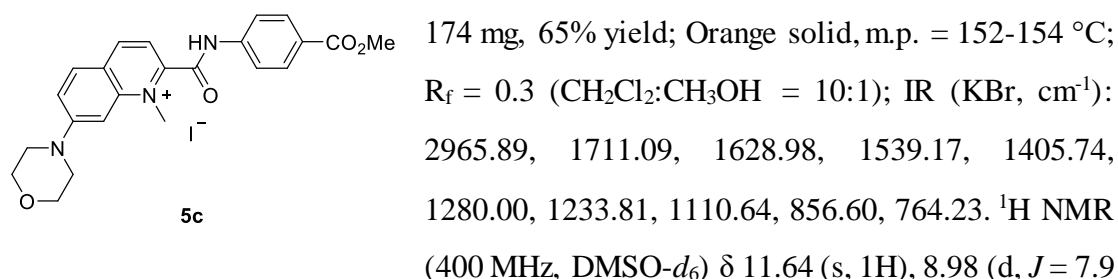

### Experimental procedure for large scale reaction

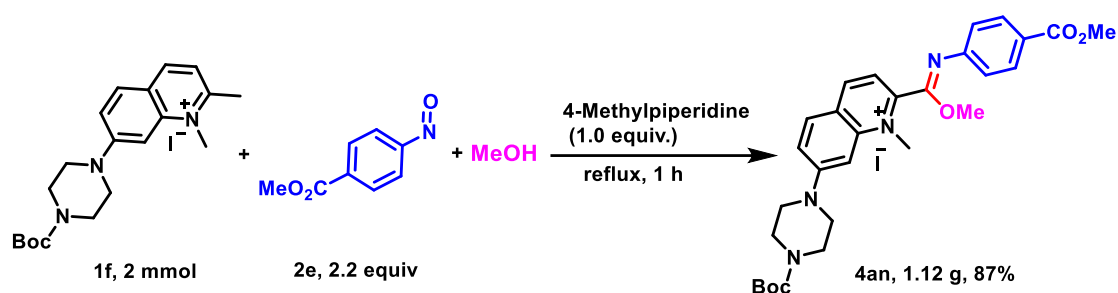

Compound **1f** (939 mg, 2 mmol) was dissolved in MeOH (80 mL) and 4-methylpiperidine (0.24 mL) was added to the mixture at 65 °C under air and stirred for 5 min. Then compound **2e** (727 mg, 4.4 mmol) was added to the mixture and stirred at 65 °C for 1 h. After the solvent was removed *in vacuo*, the crude product was purified by flash chromatography on silica gel ( $CH_2Cl_2/CH_3OH$  = 80/1) to obtain desired product **4an** (1.12 g, 87%) as a red solid.

## Synthetic applications of the imidate

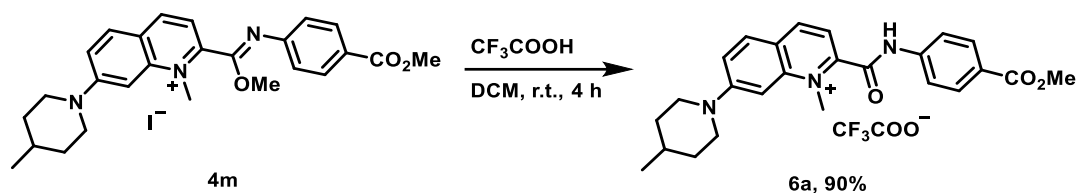

To the solution of imidate **4m** (560 mg, 1 mmol) in CH<sub>2</sub>Cl<sub>2</sub> (4.0 mL), trifluoroacetic acid (2 mL) was added. The mixture was stirred at 30 °C for 4 h. The reaction mixture was separated by flash chromatography on silica gel (CH<sub>2</sub>Cl<sub>2</sub>/MeOH = 80/1) to obtain amide product **6a** (0.49 g, 92%).

## Analysis data of starting materials and synthetic applications

### 1. 2-((4-(methoxycarbonyl)phenyl)carbamoyl)-1-methyl-7-(4-methylpiperidin-1-yl)quinolin-1-ium 2,2,2-trifluoroacetate (**6a**)

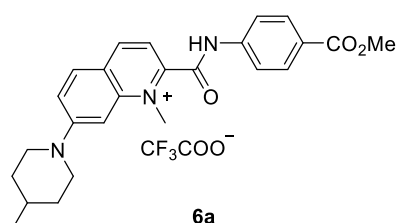

490 mg, 92% yield; Orange solid, m.p. = 147-149 °C; R<sub>f</sub> = 0.3 (CH<sub>2</sub>Cl<sub>2</sub>:CH<sub>3</sub>OH = 10:1); IR (KBr, cm<sup>-1</sup>): 2953.06, 1682.87, 1600.75, 1503.25, 1408.30, 1323.62, 1228.68, 1200.45, 1177.36, 954.11, 764.23, 710.34. <sup>1</sup>H NMR (400 MHz, DMSO-*d*<sub>6</sub>) δ 11.87 (s, 1H), 8.87 (d, *J* = 7.9 Hz, 1H), 8.16 (d, *J* = 9.5 Hz, 1H), 8.06 (d, *J* = 8.8 Hz, 2H), 7.94-7.85 (m, 3H), 7.78 (d, *J* = 7.9 Hz, 1H), 7.15 (d, *J* = 2.2 Hz, 1H), 4.40 (d, *J* = 13.6 Hz, 2H), 4.28 (s, 3H), 3.87 (s, 3H), 3.20 (t, *J* = 12.2 Hz, 2H), 1.88-1.70 (m, 3H), 1.28-1.14 (m, 2H), 0.96 (d, *J* = 6.0 Hz, 3H). <sup>13</sup>C NMR (101 MHz, DMSO) δ 166.1, 160.7, 155.3, 149.4, 144.5, 142.7, 142.4, 132.5, 130.9, 126.2, 123.8, 120.9, 120.3, 115.2, 95.3, 52.6, 47.8, 41.4, 33.9, 30.7, 21.9; HRMS (ESI) *m/z* calcd for [C<sub>25</sub>H<sub>28</sub>N<sub>3</sub>O<sub>3</sub>]<sup>+</sup> [M-CF<sub>3</sub>COO]<sup>+</sup>: 418.2126, found 418.2130.

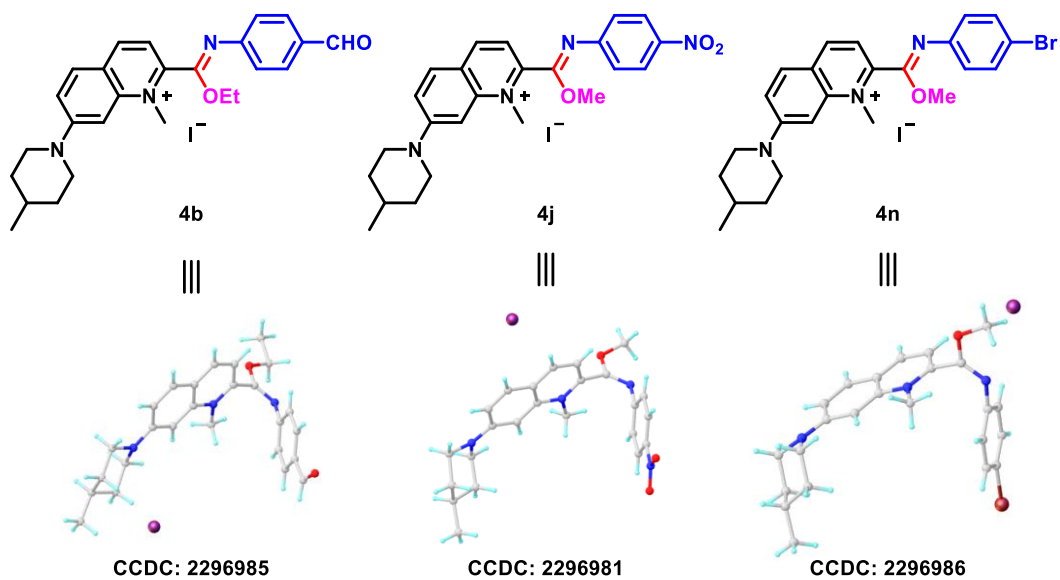

**Fig. S1.** X-ray single crystal diffraction diagram of **4b**, **4j** and **4n**.

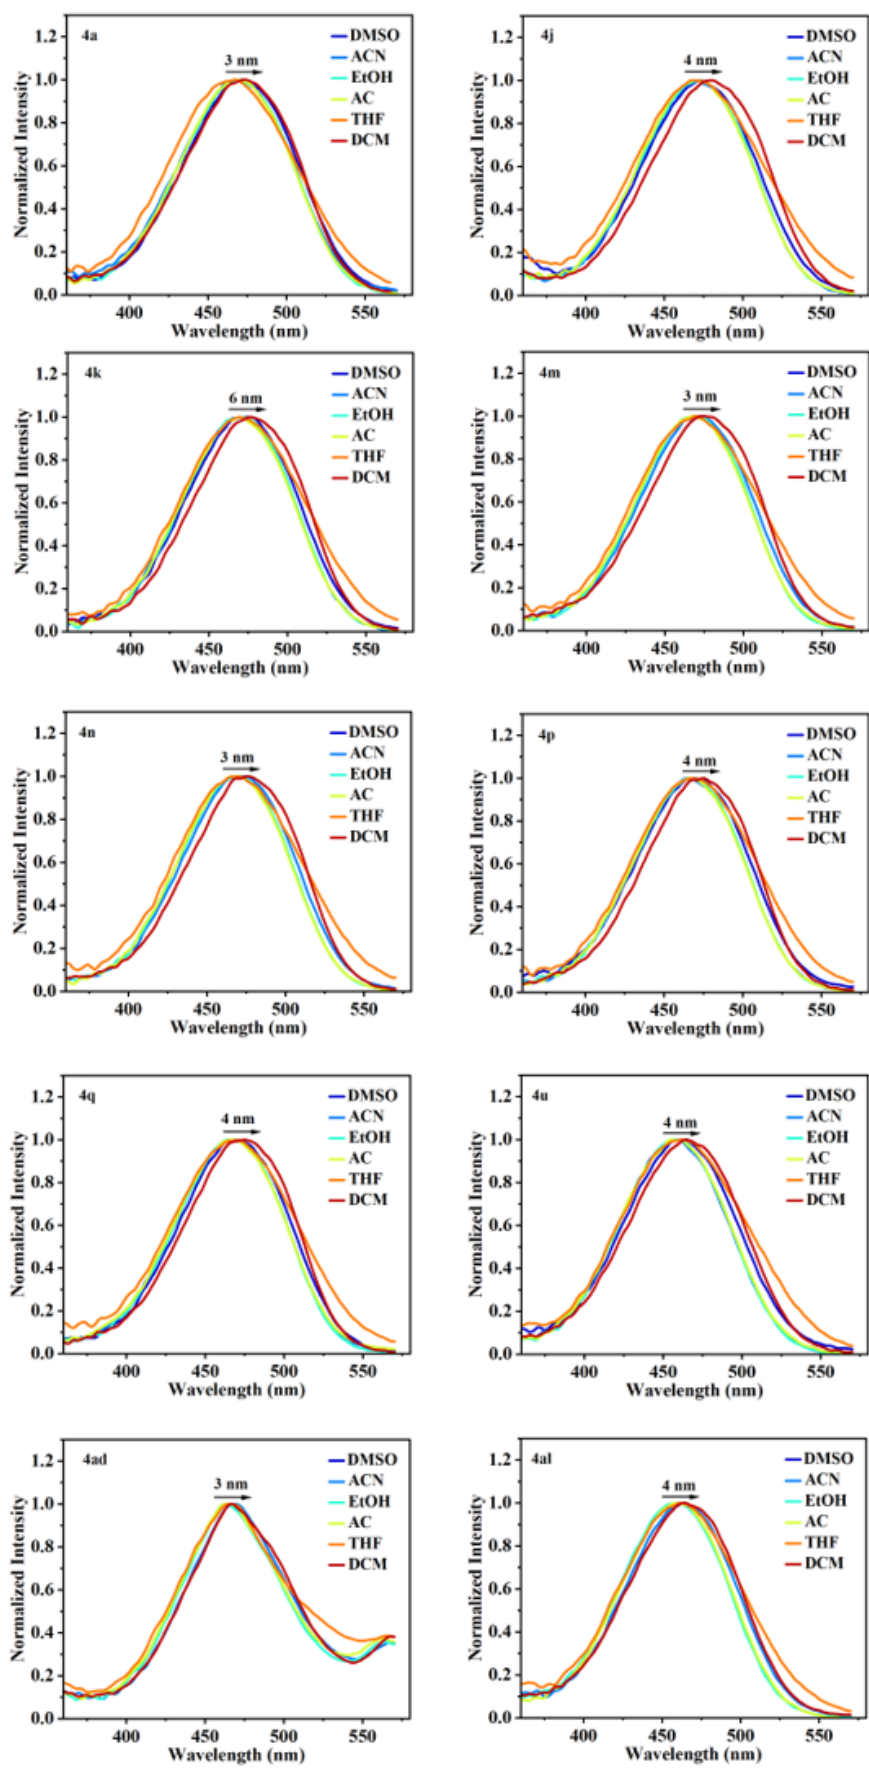

Fig. S2. Normalized UV-vis spectra of imidates 4a, 4j, 4k, 4m, 4n, 4p, 4q, 4u, 4ad and



**4al** in different solvents ( $4 \times 10^{-5}$  M).

## References

- 1 Y. S. Chen, B. Z. Zhou, F. T. Liu, J. Y. Miao, B. X. Zhao, Z. M. Lin, A quinoline-salt-based fluorescent probe for precise monitoring of pH changes on mitochondria and water, *Sens. Actuators B Chem.*, 2022, **373**, 132732.
- 2 F. T. Liu, N. Li, Y. S. Chen, H. Y. Yu, J. Y. Miao, B. X. Zhao, A quinoline-coumarin near-infrared ratiometric fluorescent probe for detection of sulfur dioxide derivatives, *Anal. Chim. Acta*, 2022, **1211**, 339908.
- 3 G. A. Molander, L. N. Cavalcanti, Nitrosation of aryl and heteroaryltrifluoroborates with nitrosonium tetrafluoroborate, *J. Org. Chem.*, 2012, **77**, 4402.

## X-Ray Crystal Structure Data

Single crystal was chosen under an optical microscope and quickly coated with high vacuum grease (Dow Corning Corporation) to prevent decomposition. Intensity data and cell parameters were recorded at 173 K on a Bruker Apex II single crystal diffractometer, employing a Mo K $\alpha$  radiation ( $\lambda = 0.71073 \text{ \AA}$ ) and a CCD area detector. The raw frame data were processed using SAINT and SADABS to yield the reflection data file.<sup>1</sup> The structure was solved using the charge-flipping algorithm, as implemented in the program *SUPERFLIP*<sup>2</sup> and refined by full-matrix least-squares techniques against  $F_o$ <sup>2</sup> using the SHELXL program<sup>3</sup> through the OLEX2 interface.<sup>4</sup> Hydrogen atoms at carbon were placed in calculated positions and refined isotropically by using a riding model. Appropriate restraints or constraints were applied to the geometry and the atomic displacement parameters of the atoms in the cluster. All structures were examined using the Addsym subroutine of PLATON<sup>5</sup> to ensure that no additional symmetry could be applied to the models. **CCDC: 2296985 (4b), CCDC: 2296983 (4f), CCDC: 2296993 (4i), CCDC: 2296981 (4j), CCDC: 2296986 (4n), CCDC: 2296988 (4x), CCDC: 2296989 (4ae), CCDC: 2296987 (5a), CCDC: 2296990 (6a)** contain the supplementary crystallographic data for this paper. These data can be obtained free of charge from the Cambridge Crystallographic Data Centre.

## References

1. *APEX3, SAINT and SADABS*. Bruker AXS Inc., Madison, Wisconsin, USA, 2015.
2. Palatinus, L. & Chapuis, G. *SUPERFLIP* - a computer program for the solution of crystal structures by charge flipping in arbitrary dimensions. *J. Appl. Crystallogr.* **40**, 786 (2007).
3. Sheldrick, G.M. Crystal structure refinement with *SHELXL*. *Acta. Crystallogr. C* **71**, 3 (2015).
4. Dolomanov, O.V., Bourhis, L.J., Gildea, R. J., Howard, J.A.K. & Puschmann, H. *OLEX2*: a complete structure solution, refinement and analysis program. *J. Appl. Crystallogr.* **42**, 339 (2009).
5. Spek, A.L. Structure validation in chemical crystallography. *Acta. Crystallogr. Sect. D.* **65**, 148 (2009).

**Crystal data and structure refinement for 4b (Thermal ellipsoids at the 30% probability level)**

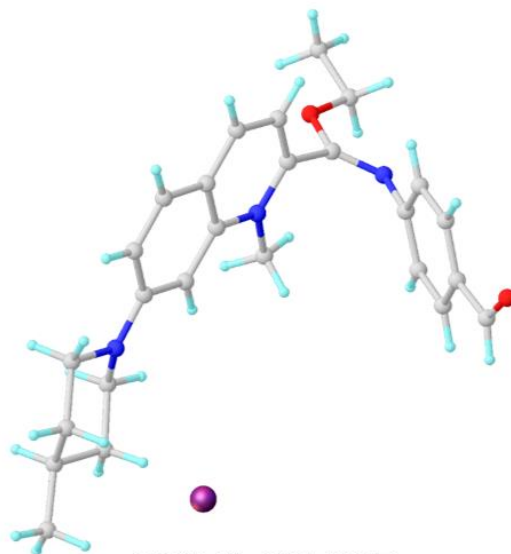

**CCDC: 2296985**

| <b>Table S2 Crystal data and structure refinement for 4b</b> |                                      |
|--------------------------------------------------------------|--------------------------------------|
| Empirical formula                                            | $C_{27}H_{32}Cl_{1.75}N_3O_2$        |
| Formula weight                                               | 596.63                               |
| Temperature [K]                                              | 173.0                                |
| Crystal system                                               | triclinic                            |
| Space group (number)                                         | $P\bar{1}$ (2)                       |
| $a$ [Å]                                                      | 10.255(3)                            |
| $b$ [Å]                                                      | 10.808(3)                            |
| $c$ [Å]                                                      | 14.297(4)                            |
| $\alpha$ [°]                                                 | 96.753(11)                           |
| $\beta$ [°]                                                  | 104.167(10)                          |
| $\gamma$ [°]                                                 | 112.127(10)                          |
| Volume [Å <sup>3</sup> ]                                     | 1383.9(6)                            |
| $Z$                                                          | 2                                    |
| $\rho_{\text{calc}}$ [gcm <sup>-3</sup> ]                    | 1.432                                |
| $\mu$ [mm <sup>-1</sup> ]                                    | 8.899                                |
| $F(000)$                                                     | 610                                  |
| Crystal size [mm <sup>3</sup> ]                              | 0.08×0.06×0.05                       |
| Crystal colour                                               | clear orangish orange                |
| Crystal shape                                                | block                                |
| Radiation                                                    | CuK $\alpha$ ( $\lambda$ =1.54178 Å) |
| 2 $\theta$ range [°]                                         | 6.56 to 130.45 (0.85 Å)              |

|                                              |                                                                  |
|----------------------------------------------|------------------------------------------------------------------|
| Index ranges                                 | -9 ≤ h ≤ 12<br>-12 ≤ k ≤ 12<br>-16 ≤ l ≤ 15                      |
| Reflections collected                        | 15832                                                            |
| Independent reflections                      | 4637<br>$R_{\text{int}} = 0.0623$<br>$R_{\text{sigma}} = 0.0715$ |
| Completeness to<br>$\theta = 65.224^\circ$   | 98.0 %                                                           |
| Data / Restraints / Parameters               | 4637/0/320                                                       |
| Goodness-of-fit on $F^2$                     | 1.162                                                            |
| Final $R$ indexes<br>[ $I \geq 2\sigma(I)$ ] | $R_1 = 0.0557$<br>$wR_2 = 0.1961$                                |
| Final $R$ indexes<br>[all data]              | $R_1 = 0.0855$<br>$wR_2 = 0.2058$                                |
| Largest peak/hole [ $e\text{\AA}^{-3}$ ]     | 1.33/-0.79                                                       |
| Extinction coefficient                       | 0.0054(8)                                                        |

**Crystal data and structure refinement for 4f (Thermal ellipsoids at the 30% probability level)**

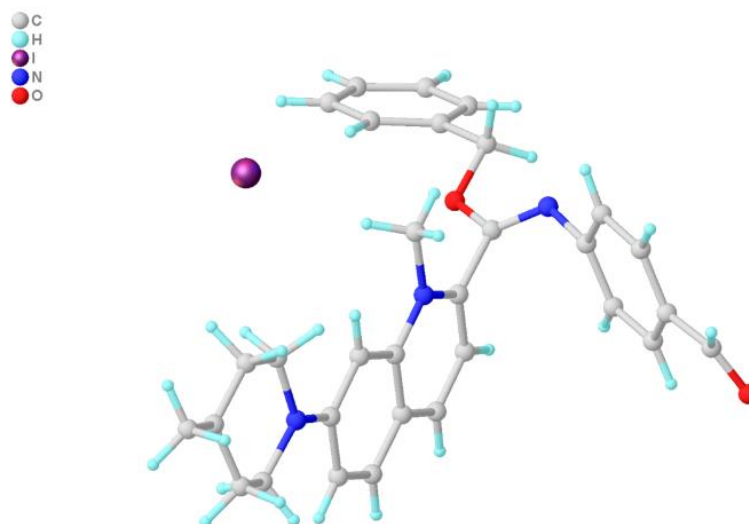

**CCDC: 2296983**

| <b>Table S3 Crystal data and structure refinement for 4f</b> |                       |
|--------------------------------------------------------------|-----------------------|
| Empirical formula                                            | $C_{31}H_{31}IN_3O_2$ |
| Formula weight                                               | 604.49                |
| Temperature [K]                                              | 173.0                 |
| Crystal system                                               | triclinic             |
| Space group (number)                                         | $P\bar{1}$ (2)        |

|                                              |                                                                  |
|----------------------------------------------|------------------------------------------------------------------|
| $a$ [Å]                                      | 10.7042(19)                                                      |
| $b$ [Å]                                      | 10.8570(19)                                                      |
| $c$ [Å]                                      | 13.812(2)                                                        |
| $\alpha$ [°]                                 | 99.501(8)                                                        |
| $\beta$ [°]                                  | 101.662(7)                                                       |
| $\gamma$ [°]                                 | 116.135(7)                                                       |
| Volume [Å <sup>3</sup> ]                     | 1351.1(4)                                                        |
| $Z$                                          | 2                                                                |
| $\rho_{\text{calc}}$ [gcm <sup>-3</sup> ]    | 1.486                                                            |
| $\mu$ [mm <sup>-1</sup> ]                    | 9.568                                                            |
| $F(000)$                                     | 614                                                              |
| Crystal size [mm <sup>3</sup> ]              | 0.12×0.11×0.1                                                    |
| Crystal colour                               | clear light orange                                               |
| Crystal shape                                | block                                                            |
| Radiation                                    | CuK $\alpha$ ( $\lambda=1.54178$ Å)                              |
| 2 $\theta$ range [°]                         | 6.83 to 136.80 (0.83 Å)                                          |
| Index ranges                                 | -12 ≤ $h$ ≤ 12<br>-13 ≤ $k$ ≤ 13<br>-16 ≤ $l$ ≤ 16               |
| Reflections collected                        | 22264                                                            |
| Independent reflections                      | 4909<br>$R_{\text{int}} = 0.0398$<br>$R_{\text{sigma}} = 0.0302$ |
| Completeness to<br>$\theta = 67.679^\circ$   | 99.3 %                                                           |
| Data / Restraints / Parameters               | 4909/24/336                                                      |
| Goodness-of-fit on $F^2$                     | 1.059                                                            |
| Final $R$ indexes<br>[ $I \geq 2\sigma(I)$ ] | $R_1 = 0.0384$<br>$wR_2 = 0.1019$                                |
| Final $R$ indexes<br>[all data]              | $R_1 = 0.0395$<br>$wR_2 = 0.1028$                                |
| Largest peak/hole [eÅ <sup>-3</sup> ]        | 1.39/-0.90                                                       |

**Crystal data and structure refinement for 4i (Thermal ellipsoids at the 30% probability level)**

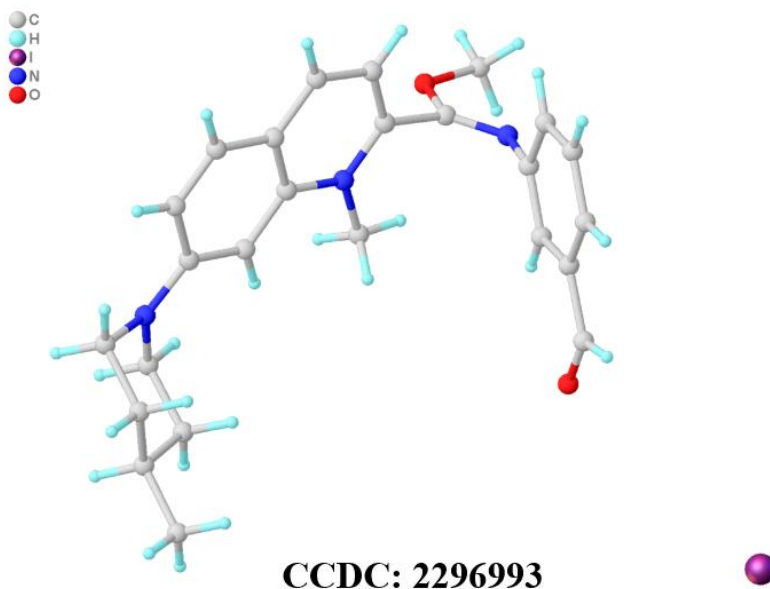

| <b>Table S4 Crystal data and structure refinement for 4i</b> |                                                                                |
|--------------------------------------------------------------|--------------------------------------------------------------------------------|
| Empirical formula                                            | C <sub>26</sub> H <sub>30</sub> Cl <sub>2</sub> IN <sub>3</sub> O <sub>2</sub> |
| Formula weight                                               | 614.33                                                                         |
| Temperature [K]                                              | 173.0                                                                          |
| Crystal system                                               | triclinic                                                                      |
| Space group (number)                                         | <i>P</i> $\bar{1}$ (2)                                                         |
| <i>a</i> [Å]                                                 | 10.524(2)                                                                      |
| <i>b</i> [Å]                                                 | 11.177(2)                                                                      |
| <i>c</i> [Å]                                                 | 12.717(3)                                                                      |
| $\alpha$ [°]                                                 | 92.557(10)                                                                     |
| $\beta$ [°]                                                  | 95.922(10)                                                                     |
| $\gamma$ [°]                                                 | 113.297(10)                                                                    |
| Volume [Å <sup>3</sup> ]                                     | 1360.6(5)                                                                      |
| <i>Z</i>                                                     | 2                                                                              |
| $\rho_{\text{calc}}$ [gcm <sup>-3</sup> ]                    | 1.500                                                                          |
| $\mu$ [mm <sup>-1</sup> ]                                    | 11.269                                                                         |
| <i>F</i> (000)                                               | 620                                                                            |
| Crystal size [mm <sup>3</sup> ]                              | 0.2×0.2×0.02                                                                   |
| Crystal colour                                               | clear light white                                                              |
| Crystal shape                                                | block                                                                          |
| Radiation                                                    | CuK $\alpha$ ( $\lambda$ =1.54178 Å)                                           |
| 2 $\theta$ range [°]                                         | 7.02 to 136.50 (0.83 Å)                                                        |
| Index ranges                                                 | -12 ≤ <i>h</i> ≤ 5<br>-10 ≤ <i>k</i> ≤ 13<br>-15 ≤ <i>l</i> ≤ 15               |
| Reflections collected                                        | 14488                                                                          |

|                                                 |                                                                  |
|-------------------------------------------------|------------------------------------------------------------------|
| Independent reflections                         | 4916<br>$R_{\text{int}} = 0.0498$<br>$R_{\text{sigma}} = 0.0470$ |
| Completeness to<br>$\theta = 68.25^\circ$       | 98.4 %                                                           |
| Data / Restraints / Parameters                  | 4916/0/310                                                       |
| Goodness-of-fit on $F^2$                        | 1.059                                                            |
| Final $R$ indexes<br>[ $I \geq 2\sigma(I)$ ]    | $R_1 = 0.0470$<br>$wR_2 = 0.1274$                                |
| Final $R$ indexes<br>[all data]                 | $R_1 = 0.0530$<br>$wR_2 = 0.1334$                                |
| Largest peak/hole [ $\text{e}\text{\AA}^{-3}$ ] | 3.00/-0.92                                                       |

**Crystal data and structure refinement for 4j (Thermal ellipsoids at the 30% probability level)**

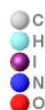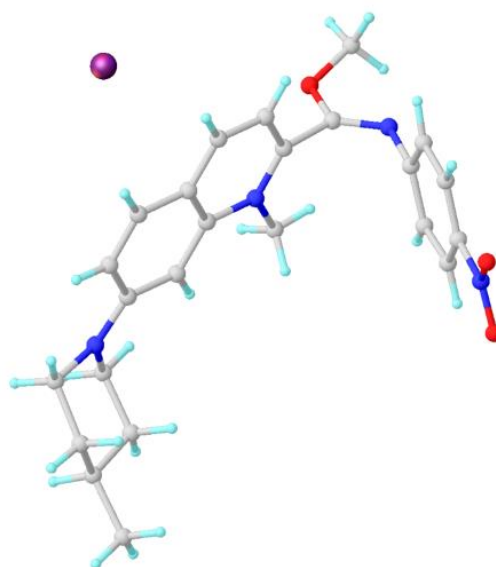

**CCDC: 2296981**

|                      |                                                   |
|----------------------|---------------------------------------------------|
| Empirical formula    | $\text{C}_{30}\text{H}_{41}\text{IN}_4\text{O}_3$ |
| Formula weight       | 632.57                                            |
| Temperature [K]      | 173.0                                             |
| Crystal system       | monoclinic                                        |
| Space group (number) | $P2_1/n$ (14)                                     |
| $a$ [ $\text{\AA}$ ] | 17.078(5)                                         |
| $b$ [ $\text{\AA}$ ] | 10.396(2)                                         |
| $c$ [ $\text{\AA}$ ] | 17.758(5)                                         |

|                                                        |                                                                                |
|--------------------------------------------------------|--------------------------------------------------------------------------------|
| $\alpha$ [°]                                           | 90                                                                             |
| $\beta$ [°]                                            | 108.958(10)                                                                    |
| $\gamma$ [°]                                           | 90                                                                             |
| Volume [Å <sup>3</sup> ]                               | 2981.8(13)                                                                     |
| <i>Z</i>                                               | 4                                                                              |
| $\rho_{\text{calc}}$ [gcm <sup>-3</sup> ]              | 1.409                                                                          |
| $\mu$ [mm <sup>-1</sup> ]                              | 8.723                                                                          |
| <i>F</i> (000)                                         | 1304                                                                           |
| Crystal size [mm <sup>3</sup> ]                        | 0.08×0.06×0.05                                                                 |
| Crystal colour                                         | clear orangish orange                                                          |
| Crystal shape                                          | block                                                                          |
| Radiation                                              | CuK $\alpha$ ( $\lambda=1.54178$ Å)                                            |
| 2 $\theta$ range [°]                                   | 8.74 to 130.17 (0.85 Å)                                                        |
| Index ranges                                           | -20 ≤ <i>h</i> ≤ 14<br>-12 ≤ <i>k</i> ≤ 10<br>-17 ≤ <i>l</i> ≤ 20              |
| Reflections collected                                  | 14070                                                                          |
| Independent reflections                                | 5016<br><i>R</i> <sub>int</sub> = 0.0524<br><i>R</i> <sub>sigma</sub> = 0.0590 |
| Completeness to<br>$\theta = 65.084^\circ$             | 98.6 %                                                                         |
| Data / Restraints / Parameters                         | 5016/47/349                                                                    |
| Goodness-of-fit on <i>F</i> <sup>2</sup>               | 1.093                                                                          |
| Final <i>R</i> indexes<br>[ <i>I</i> ≥ 2σ( <i>I</i> )] | <i>R</i> <sub>1</sub> = 0.0782<br><i>wR</i> <sub>2</sub> = 0.2233              |
| Final <i>R</i> indexes<br>[all data]                   | <i>R</i> <sub>1</sub> = 0.1007<br><i>wR</i> <sub>2</sub> = 0.2485              |
| Largest peak/hole [eÅ <sup>-3</sup> ]                  | 1.74/-2.37                                                                     |
| Extinction coefficient                                 | 0.0026(3)                                                                      |

**Crystal data and structure refinement for 4n (Thermal ellipsoids at the 30% probability level)**



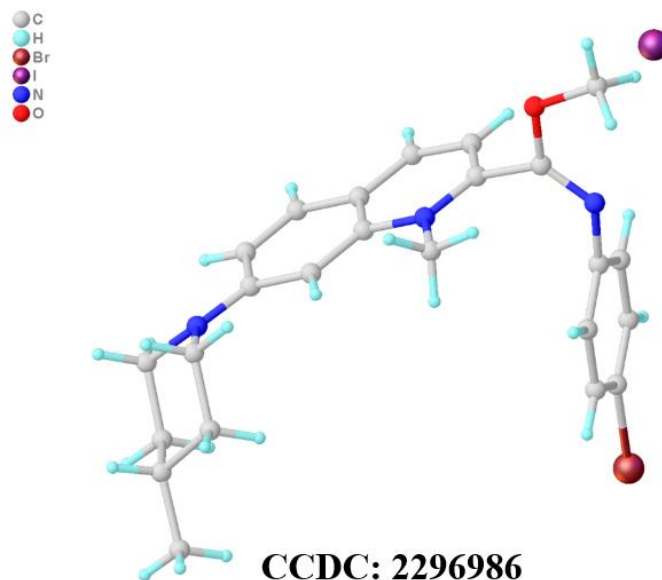

| <b>Table S6 Crystal data and structure refinement for 4n</b> |                                                                     |
|--------------------------------------------------------------|---------------------------------------------------------------------|
| Empirical formula                                            | C <sub>25</sub> H <sub>29</sub> BrCl <sub>2</sub> IN <sub>3</sub> O |
| Formula weight                                               | 665.22                                                              |
| Temperature [K]                                              | 173.0                                                               |
| Crystal system                                               | triclinic                                                           |
| Space group (number)                                         | <i>P</i> $\bar{1}$ (2)                                              |
| <i>a</i> [Å]                                                 | 10.3459(11)                                                         |
| <i>b</i> [Å]                                                 | 11.5121(12)                                                         |
| <i>c</i> [Å]                                                 | 12.6578(13)                                                         |
| $\alpha$ [°]                                                 | 84.402(6)                                                           |
| $\beta$ [°]                                                  | 78.754(5)                                                           |
| $\gamma$ [°]                                                 | 70.128(5)                                                           |
| Volume [Å <sup>3</sup> ]                                     | 1389.8(3)                                                           |
| <i>Z</i>                                                     | 2                                                                   |
| $\rho_{\text{calc}}$ [gcm <sup>-3</sup> ]                    | 1.590                                                               |
| $\mu$ [mm <sup>-1</sup> ]                                    | 12.674                                                              |
| <i>F</i> (000)                                               | 660                                                                 |
| Crystal size [mm <sup>3</sup> ]                              | 0.006×0.004×0.002                                                   |
| Crystal colour                                               | clear light yellow                                                  |
| Crystal shape                                                | block                                                               |
| Radiation                                                    | CuK $\alpha$ ( $\lambda$ =1.54178 Å)                                |
| 2 $\theta$ range [°]                                         | 7.12 to 134.46 (0.84 Å)                                             |
| Index ranges                                                 | -11 ≤ <i>h</i> ≤ 12<br>-13 ≤ <i>k</i> ≤ 13<br>-14 ≤ <i>l</i> ≤ 15   |
| Reflections collected                                        | 18569                                                               |
| Independent reflections                                      | 4883                                                                |

|                                              |                                                          |
|----------------------------------------------|----------------------------------------------------------|
|                                              | $R_{\text{int}} = 0.0473$<br>$R_{\text{sigma}} = 0.0402$ |
| Completeness to<br>$\theta = 67.228^\circ$   | 98.0 %                                                   |
| Data / Restraints / Parameters               | 4883/144/320                                             |
| Goodness-of-fit on $F^2$                     | 1.047                                                    |
| Final $R$ indexes<br>[ $I \geq 2\sigma(I)$ ] | $R_1 = 0.0376$<br>$wR_2 = 0.0962$                        |
| Final $R$ indexes<br>[all data]              | $R_1 = 0.0432$<br>$wR_2 = 0.0998$                        |
| Largest peak/hole [ $e\text{\AA}^{-3}$ ]     | 1.26/-1.01                                               |
| Extinction coefficient                       | 0.00117(14)                                              |

**Crystal data and structure refinement for 4x (Thermal ellipsoids at the 30% probability level)**

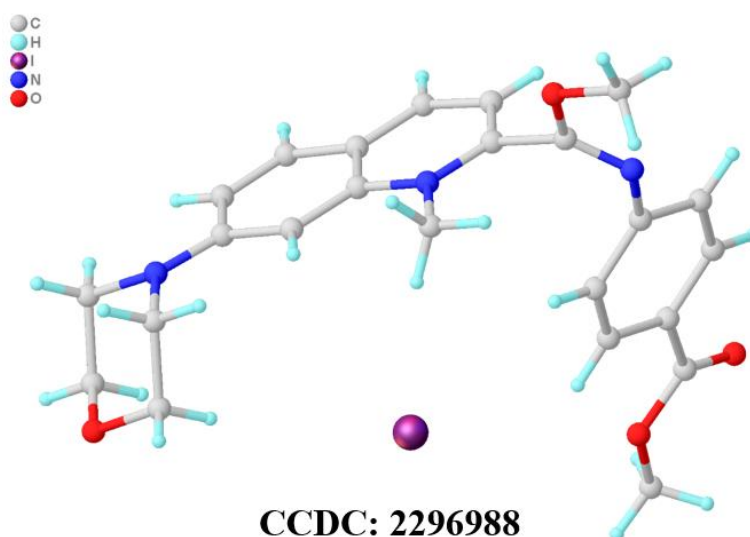

|                          |                                                   |
|--------------------------|---------------------------------------------------|
| Empirical formula        | $\text{C}_{24}\text{H}_{26}\text{IN}_3\text{O}_4$ |
| Formula weight           | 547.38                                            |
| Temperature [K]          | 173                                               |
| Crystal system           | monoclinic                                        |
| Space group (number)     | $P2_1/n$ (14)                                     |
| $a$ [Å]                  | 9.9857(4)                                         |
| $b$ [Å]                  | 16.0279(7)                                        |
| $c$ [Å]                  | 14.3669(7)                                        |
| $\alpha$ [°]             | 90                                                |
| $\beta$ [°]              | 92.359(2)                                         |
| $\gamma$ [°]             | 90                                                |
| Volume [Å <sup>3</sup> ] | 2297.47(18)                                       |

|                                              |                                                                  |
|----------------------------------------------|------------------------------------------------------------------|
| Z                                            | 4                                                                |
| $\rho_{\text{calc}}$ [gcm <sup>-3</sup> ]    | 1.583                                                            |
| $\mu$ [mm <sup>-1</sup> ]                    | 11.249                                                           |
| $F(000)$                                     | 1104                                                             |
| Crystal size [mm <sup>3</sup> ]              | 0.03×0.02×0.02                                                   |
| Crystal colour                               | clear light red                                                  |
| Crystal shape                                | block                                                            |
| Radiation                                    | CuK $\alpha$ ( $\lambda=1.54178$ Å)                              |
| 2 $\theta$ range [°]                         | 8.27 to 136.48 (0.83 Å)                                          |
| Index ranges                                 | -3 ≤ h ≤ 11<br>-19 ≤ k ≤ 19<br>-17 ≤ l ≤ 17                      |
| Reflections collected                        | 13306                                                            |
| Independent reflections                      | 4109<br>$R_{\text{int}} = 0.0384$<br>$R_{\text{sigma}} = 0.0364$ |
| Completeness to<br>$\theta = 67.679^\circ$   | 98.1 %                                                           |
| Data / Restraints / Parameters               | 4109/0/292                                                       |
| Goodness-of-fit on $F^2$                     | 1.033                                                            |
| Final $R$ indexes<br>[ $I \geq 2\sigma(I)$ ] | $R_1 = 0.0272$<br>$wR_2 = 0.0677$                                |
| Final $R$ indexes<br>[all data]              | $R_1 = 0.0290$<br>$wR_2 = 0.0687$                                |
| Largest peak/hole [eÅ <sup>-3</sup> ]        | 0.72/-1.04                                                       |

**Crystal data and structure refinement for 4ae (Thermal ellipsoids at the 30% probability level)**

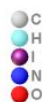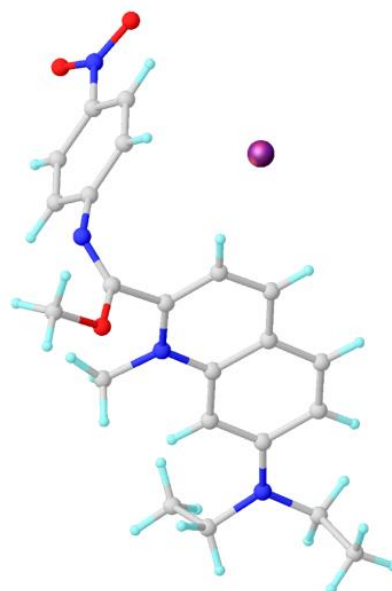

CCDC: 2296989

| Table S8 Crystal data and structure refinement for 4ae |                                                                     |
|--------------------------------------------------------|---------------------------------------------------------------------|
| Empirical formula                                      | C <sub>22.50</sub> H <sub>26</sub> ClIN <sub>4</sub> O <sub>3</sub> |
| Formula weight                                         | 562.82                                                              |
| Temperature [K]                                        | 173.0                                                               |
| Crystal system                                         | monoclinic                                                          |
| Space group (number)                                   | <i>P</i> 2 <sub>1</sub> / <i>c</i> (14)                             |
| <i>a</i> [Å]                                           | 25.754(2)                                                           |
| <i>b</i> [Å]                                           | 13.9662(13)                                                         |
| <i>c</i> [Å]                                           | 14.3475(14)                                                         |
| $\alpha$ [°]                                           | 90                                                                  |
| $\beta$ [°]                                            | 103.041(4)                                                          |
| $\gamma$ [°]                                           | 90                                                                  |
| Volume [Å <sup>3</sup> ]                               | 5027.4(8)                                                           |
| <i>Z</i>                                               | 8                                                                   |
| $\rho_{\text{calc}}$ [gcm <sup>-3</sup> ]              | 1.487                                                               |
| $\mu$ [mm <sup>-1</sup> ]                              | 11.232                                                              |
| <i>F</i> (000)                                         | 2264                                                                |
| Crystal size [mm <sup>3</sup> ]                        | 0.04×0.03×0.02                                                      |
| Crystal colour                                         | clear light yellow                                                  |
| Crystal shape                                          | block                                                               |
| Radiation                                              | CuK $\alpha$ ( $\lambda$ =1.54184 Å)                                |
| 2 $\theta$ range [°]                                   | 3.52 to 133.10 (0.84 Å)                                             |
| Index ranges                                           | -30 ≤ <i>h</i> ≤ 30<br>-15 ≤ <i>k</i> ≤ 16<br>-14 ≤ <i>l</i> ≤ 16   |
| Reflections collected                                  | 53456                                                               |
| Independent reflections                                | 8811                                                                |

|                                              |                                                          |
|----------------------------------------------|----------------------------------------------------------|
|                                              | $R_{\text{int}} = 0.0513$<br>$R_{\text{sigma}} = 0.0351$ |
| Completeness to<br>$\theta = 66.549^\circ$   | 99.3 %                                                   |
| Data / Restraints / Parameters               | 8811/50/596                                              |
| Goodness-of-fit on $F^2$                     | 1.049                                                    |
| Final $R$ indexes<br>[ $I \geq 2\sigma(I)$ ] | $R_1 = 0.0503$<br>$wR_2 = 0.1377$                        |
| Final $R$ indexes<br>[all data]              | $R_1 = 0.0528$<br>$wR_2 = 0.1396$                        |
| Largest peak/hole [ $e\text{\AA}^{-3}$ ]     | 1.71/-1.08                                               |
| Extinction coefficient                       | 0.00065(5)                                               |

**Crystal data and structure refinement for 5a (Thermal ellipsoids at the 30% probability level)**

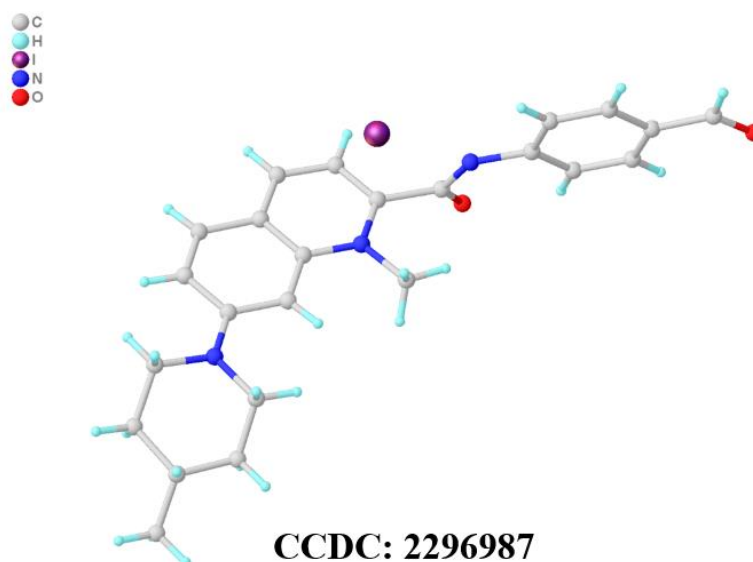

|                      |                                                                       |
|----------------------|-----------------------------------------------------------------------|
| Empirical formula    | $\text{C}_{50}\text{H}_{54}\text{Cl}_4\text{I}_2\text{N}_6\text{O}_4$ |
| Formula weight       | 1198.59                                                               |
| Temperature [K]      | 173.0                                                                 |
| Crystal system       | monoclinic                                                            |
| Space group (number) | $P2_1/c$ (14)                                                         |
| $a$ [Å]              | 29.663(3)                                                             |
| $b$ [Å]              | 11.5826(12)                                                           |
| $c$ [Å]              | 14.9235(16)                                                           |
| $\alpha$ [°]         | 90                                                                    |
| $\beta$ [°]          | 99.262(4)                                                             |
| $\gamma$ [°]         | 90                                                                    |

|                                                 |                                                                      |
|-------------------------------------------------|----------------------------------------------------------------------|
| Volume [ $\text{\AA}^3$ ]                       | 5060.5(9)                                                            |
| Z                                               | 4                                                                    |
| $\rho_{\text{calc}}$ [ $\text{gcm}^{-3}$ ]      | 1.573                                                                |
| $\mu$ [ $\text{mm}^{-1}$ ]                      | 12.105                                                               |
| $F(000)$                                        | 2408                                                                 |
| Crystal size [ $\text{mm}^3$ ]                  | 0.06×0.06×0.05                                                       |
| Crystal colour                                  | clear reddish red                                                    |
| Crystal shape                                   | block                                                                |
| Radiation                                       | $\text{CuK}\alpha$ ( $\lambda=1.54178 \text{ \AA}$ )                 |
| 2 $\theta$ range [ $^\circ$ ]                   | 3.02 to 133.67 (0.84 $\text{\AA}$ )                                  |
| Index ranges                                    | $-35 \leq h \leq 35$<br>$-13 \leq k \leq 13$<br>$-17 \leq l \leq 17$ |
| Reflections collected                           | 42965                                                                |
| Independent reflections                         | 8878<br>$R_{\text{int}} = 0.0532$<br>$R_{\text{sigma}} = 0.0417$     |
| Completeness to<br>$\theta = 66.836^\circ$      | 98.9 %                                                               |
| Data / Restraints / Parameters                  | 8878/210/600                                                         |
| Goodness-of-fit on $F^2$                        | 1.035                                                                |
| Final $R$ indexes<br>[ $I \geq 2\sigma(I)$ ]    | $R_1 = 0.0610$<br>$wR_2 = 0.1615$                                    |
| Final $R$ indexes<br>[all data]                 | $R_1 = 0.0800$<br>$wR_2 = 0.1751$                                    |
| Largest peak/hole [ $\text{e}\text{\AA}^{-3}$ ] | 1.66/-1.87                                                           |
| Extinction coefficient                          | 0.00026(5)                                                           |

**Crystal data and structure refinement for 6a (Thermal ellipsoids at the 30% probability level)**

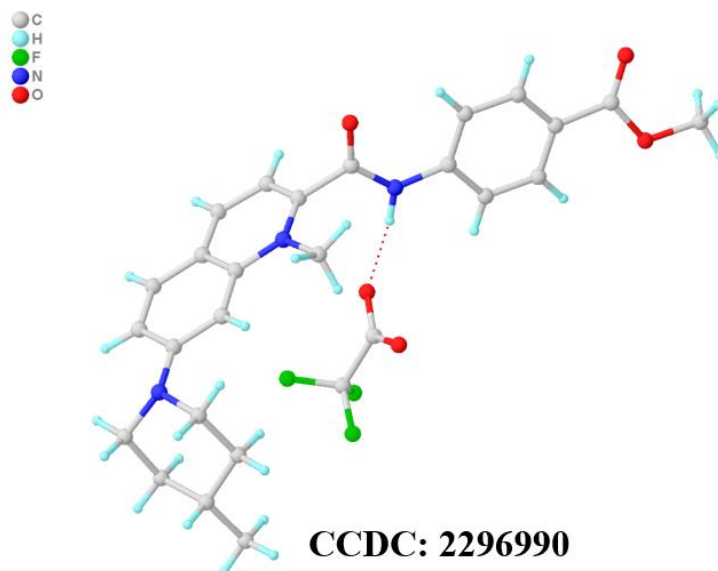

| <b>Table S10 Crystal data and structure refinement for 6a</b> |                                                                              |
|---------------------------------------------------------------|------------------------------------------------------------------------------|
| Empirical formula                                             | C <sub>26</sub> H <sub>28</sub> F <sub>3</sub> N <sub>4</sub> O <sub>5</sub> |
| Formula weight                                                | 533.52                                                                       |
| Temperature [K]                                               | 173.0                                                                        |
| Crystal system                                                | triclinic                                                                    |
| Space group (number)                                          | <i>P</i> $\bar{1}$ (2)                                                       |
| <i>a</i> [Å]                                                  | 9.1709(4)                                                                    |
| <i>b</i> [Å]                                                  | 10.3735(5)                                                                   |
| <i>c</i> [Å]                                                  | 14.4305(7)                                                                   |
| $\alpha$ [°]                                                  | 109.198(3)                                                                   |
| $\beta$ [°]                                                   | 90.551(3)                                                                    |
| $\gamma$ [°]                                                  | 104.138(3)                                                                   |
| Volume [Å <sup>3</sup> ]                                      | 1251.14(10)                                                                  |
| <i>Z</i>                                                      | 2                                                                            |
| $\rho_{\text{calc}}$ [gcm <sup>-3</sup> ]                     | 1.416                                                                        |
| $\mu$ [mm <sup>-1</sup> ]                                     | 0.969                                                                        |
| <i>F</i> (000)                                                | 558                                                                          |
| Crystal size [mm <sup>3</sup> ]                               | 0.04×0.03×0.02                                                               |
| Crystal colour                                                | orange                                                                       |
| Crystal shape                                                 | needle                                                                       |
| Radiation                                                     | CuK $\alpha$ ( $\lambda$ =1.54178 Å)                                         |
| 2 $\theta$ range [°]                                          | 6.52 to 136.97 (0.83 Å)                                                      |
| Index ranges                                                  | -11 ≤ <i>h</i> ≤ 4<br>-11 ≤ <i>k</i> ≤ 12<br>-16 ≤ <i>l</i> ≤ 17             |
| Reflections collected                                         | 13934                                                                        |
| Independent reflections                                       | 4562                                                                         |

|                                                 |                                                          |
|-------------------------------------------------|----------------------------------------------------------|
|                                                 | $R_{\text{int}} = 0.0431$<br>$R_{\text{sigma}} = 0.0370$ |
| Completeness to<br>$\theta = 67.679^\circ$      | 99.3 %                                                   |
| Data / Restraints / Parameters                  | 4562/0/357                                               |
| Goodness-of-fit on $F^2$                        | 0.926                                                    |
| Final $R$ indexes<br>[ $I \geq 2\sigma(I)$ ]    | $R_1 = 0.0398$<br>$wR_2 = 0.1114$                        |
| Final $R$ indexes<br>[all data]                 | $R_1 = 0.0544$<br>$wR_2 = 0.1209$                        |
| Largest peak/hole [ $\text{e}\text{\AA}^{-3}$ ] | 0.35/-0.26                                               |



### NMR spectrum for the starting materials

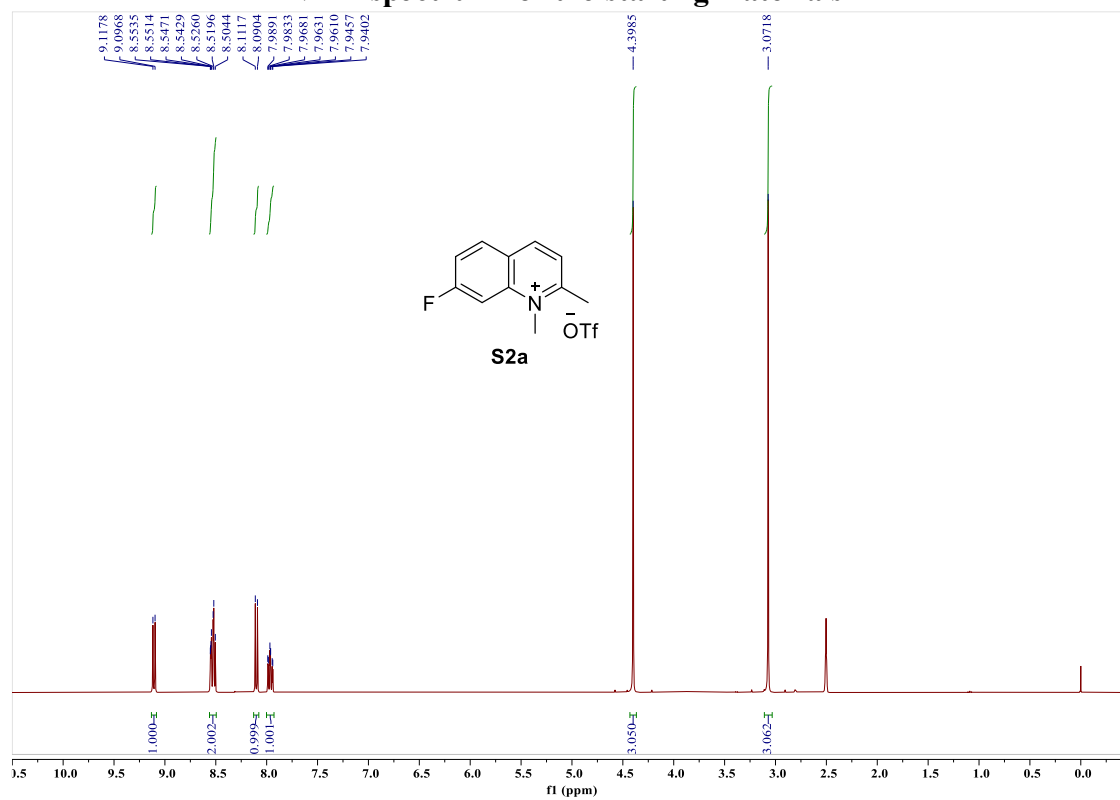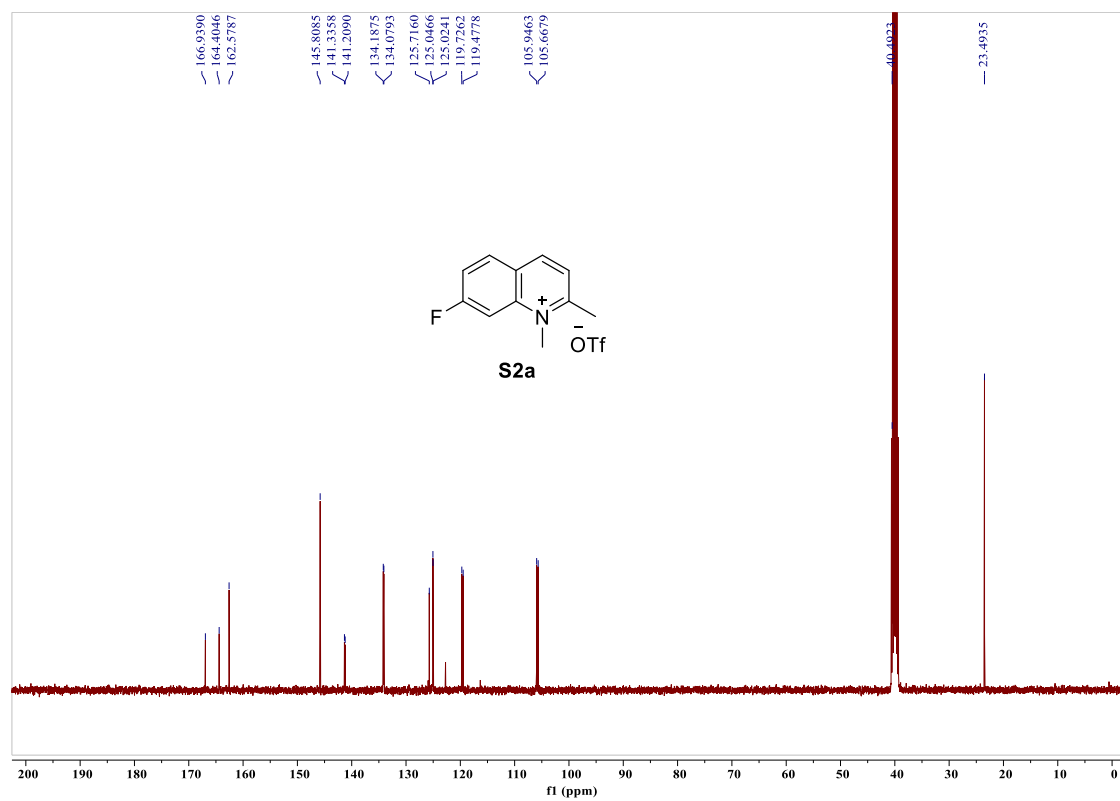

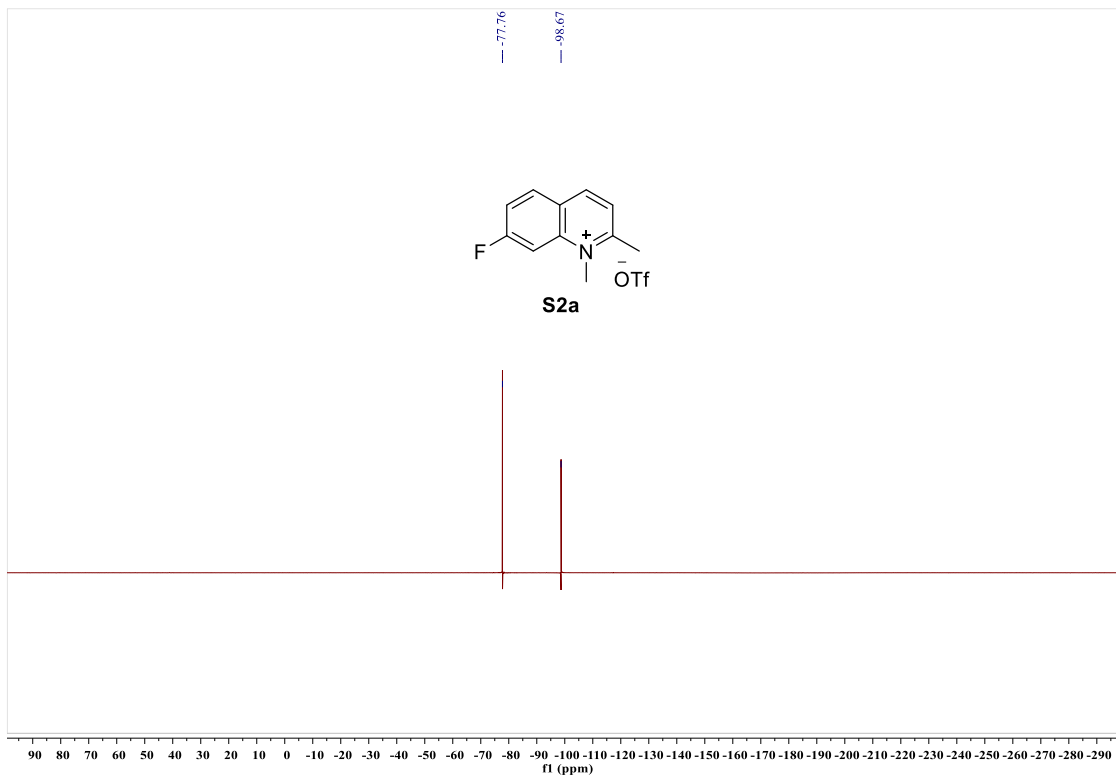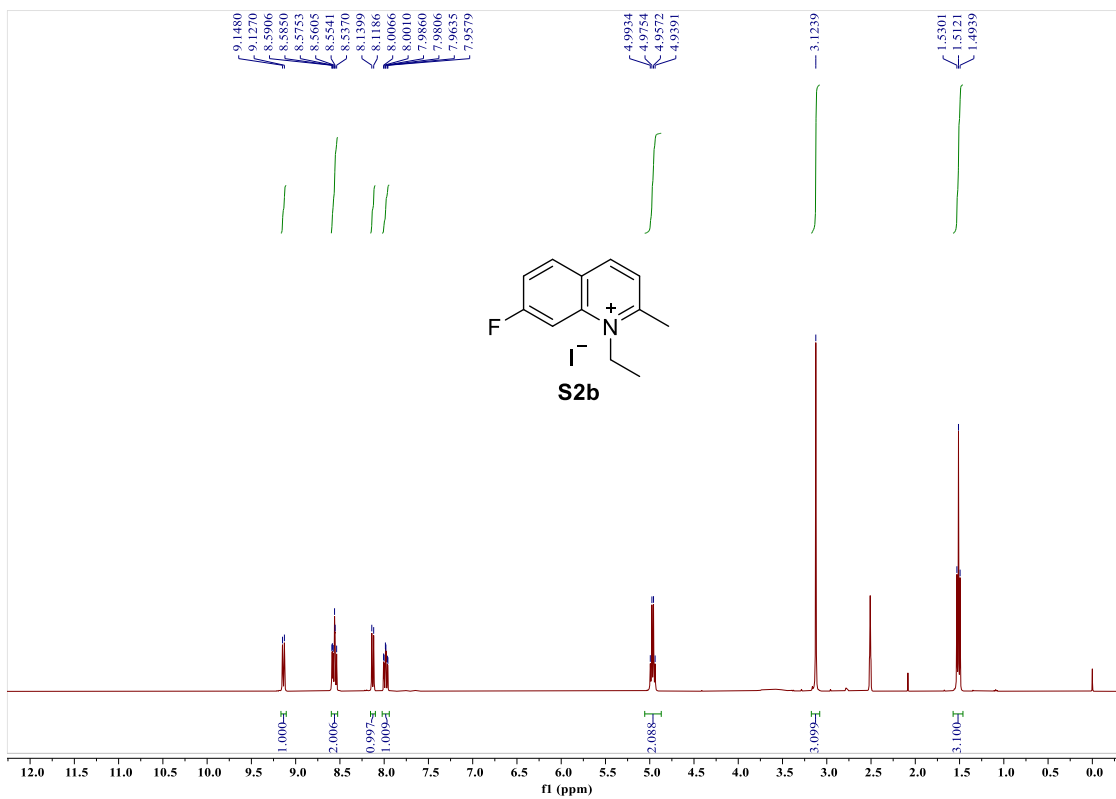

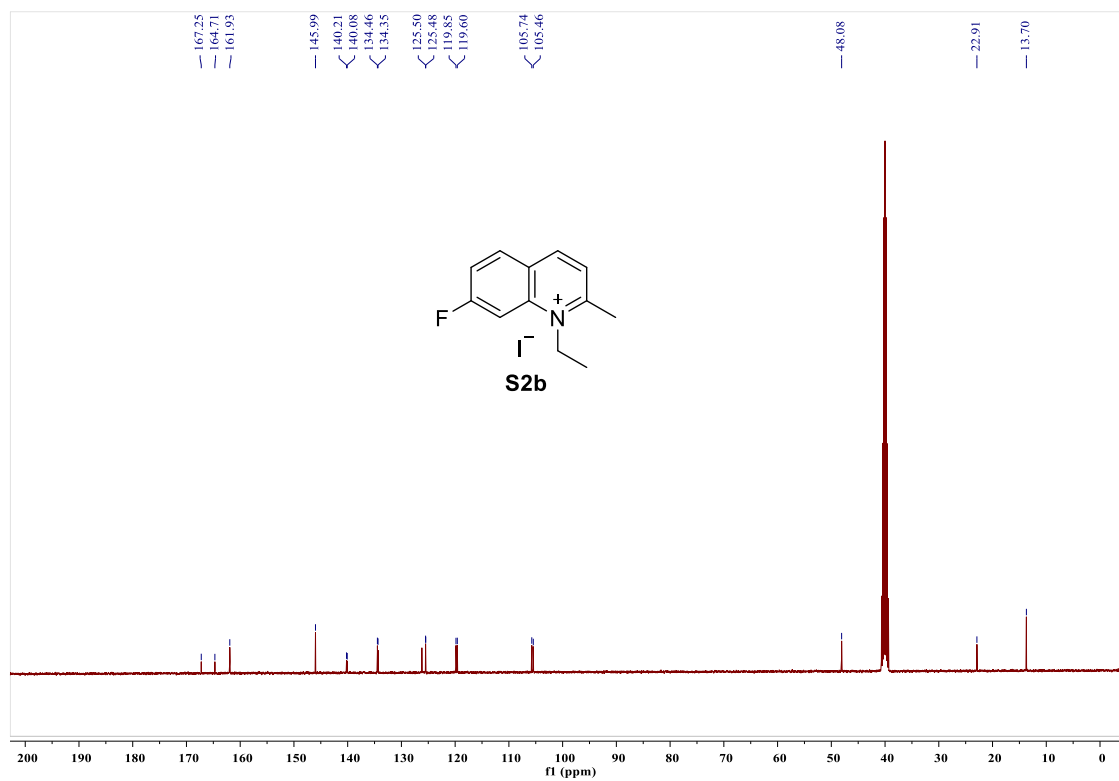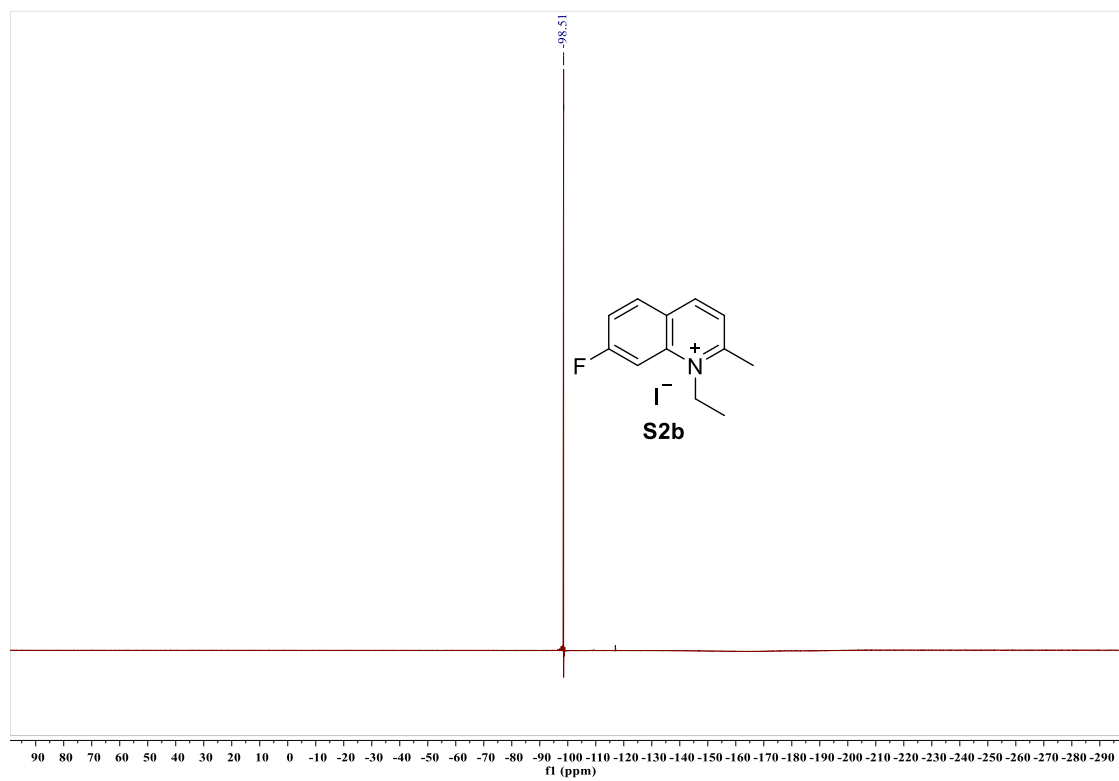

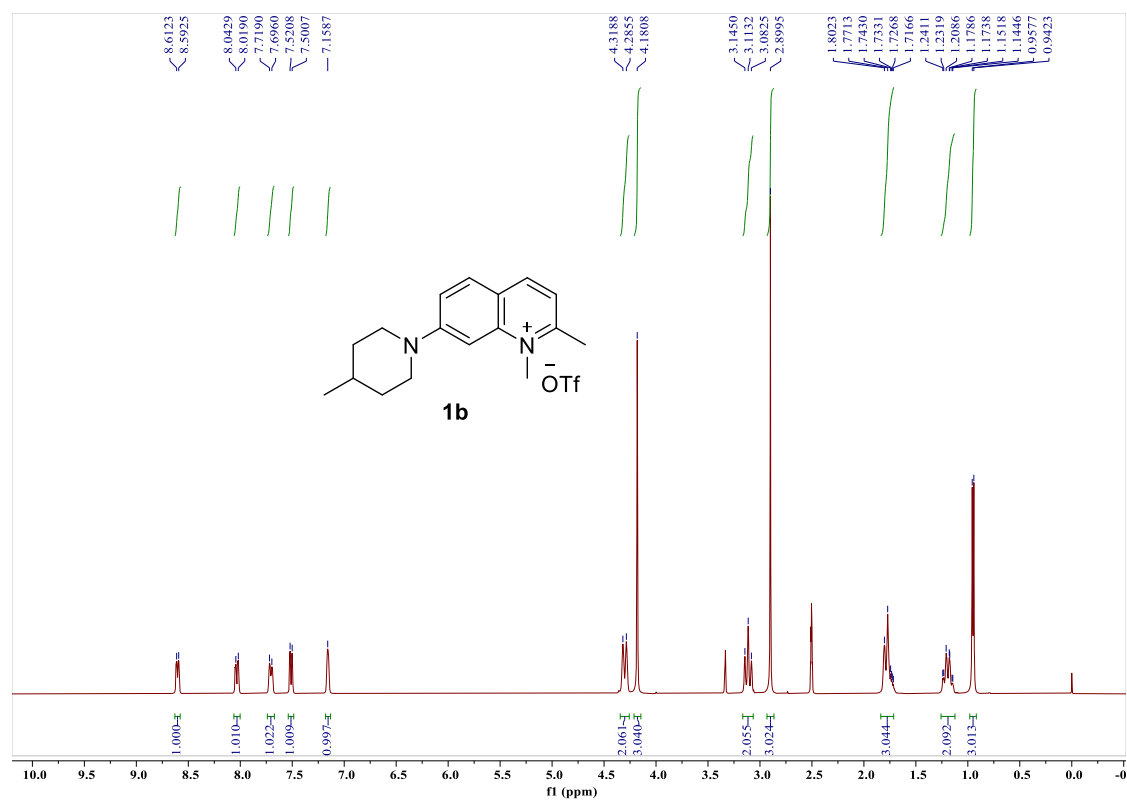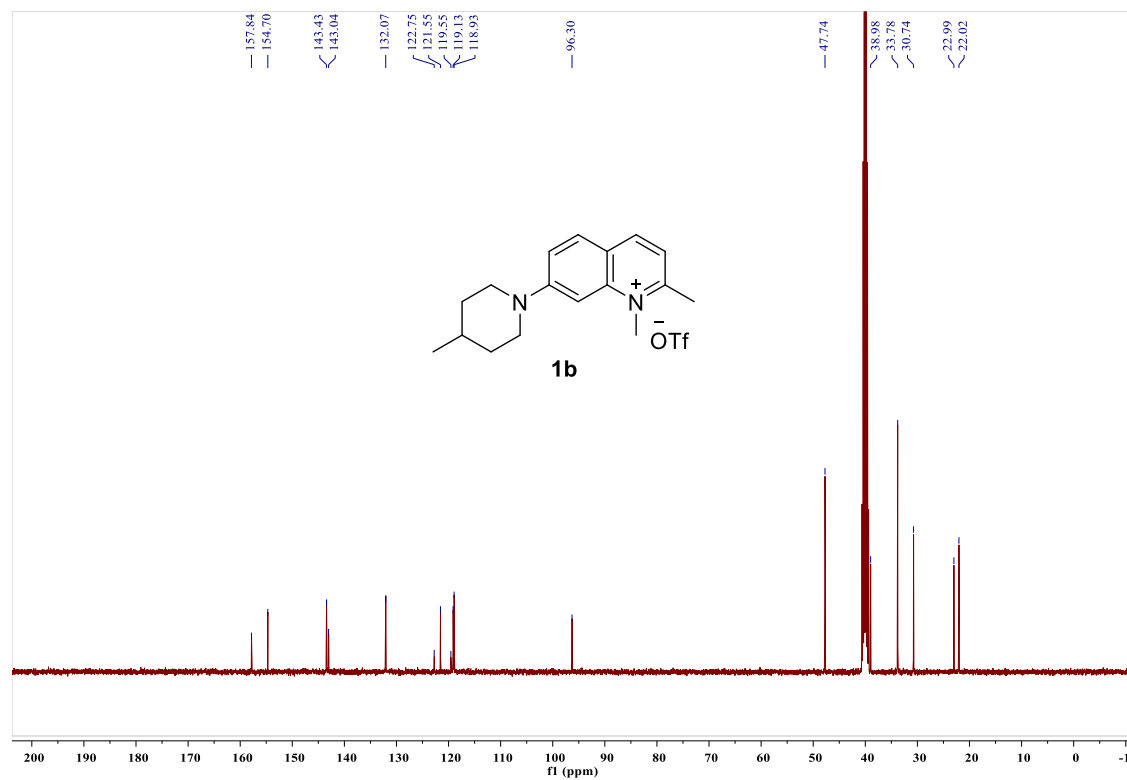

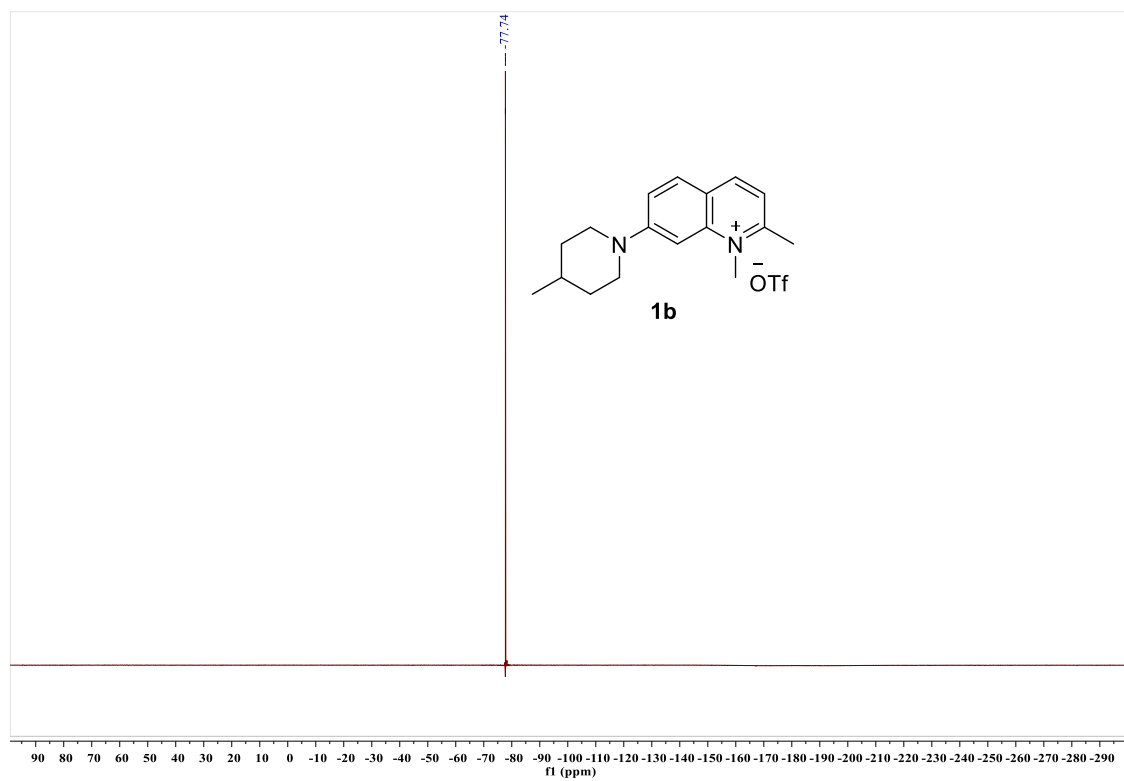

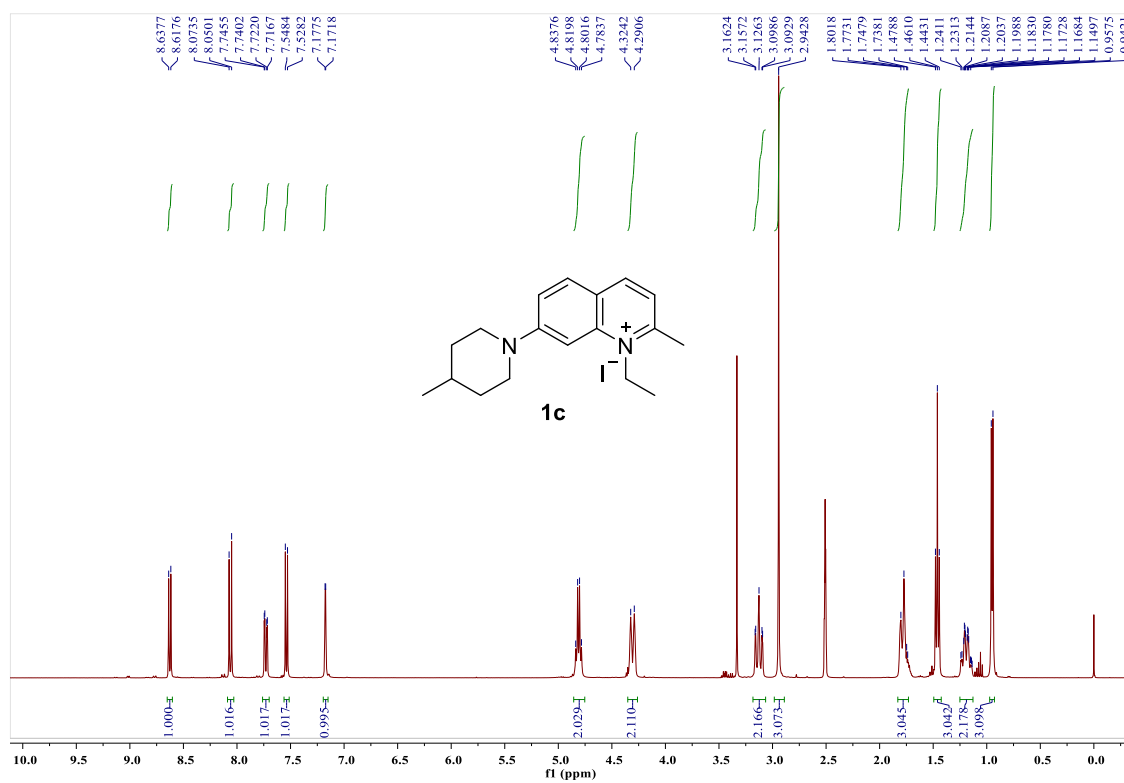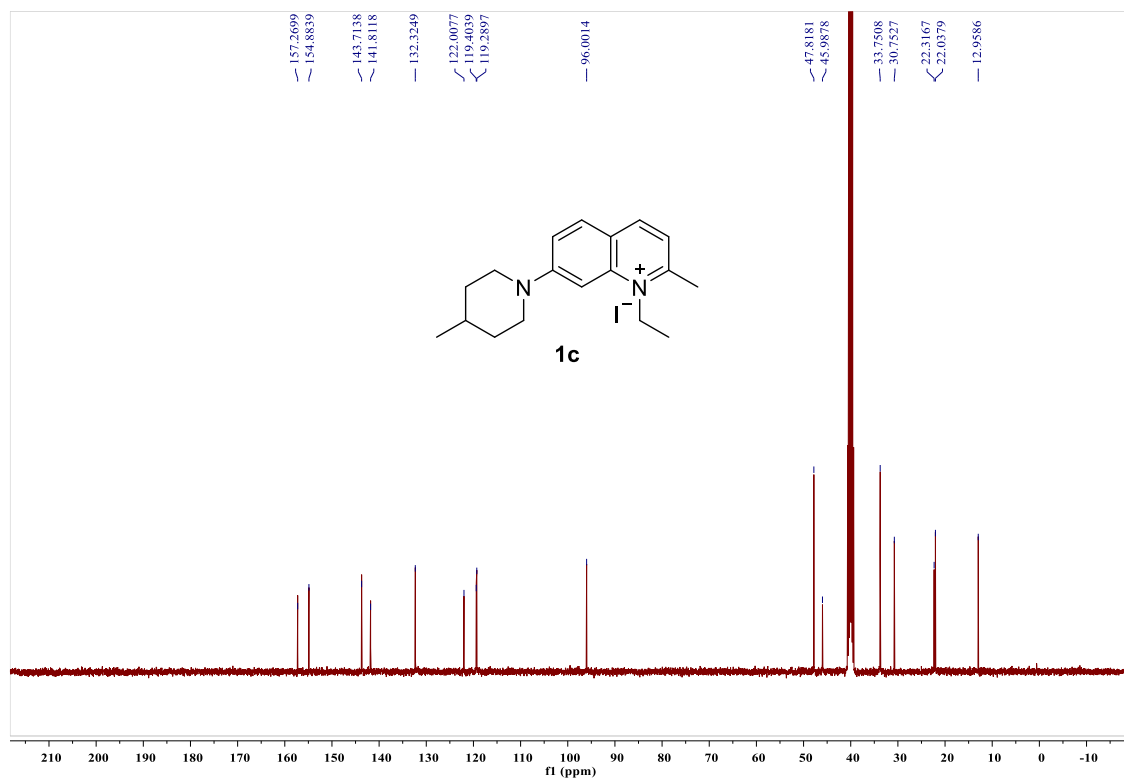

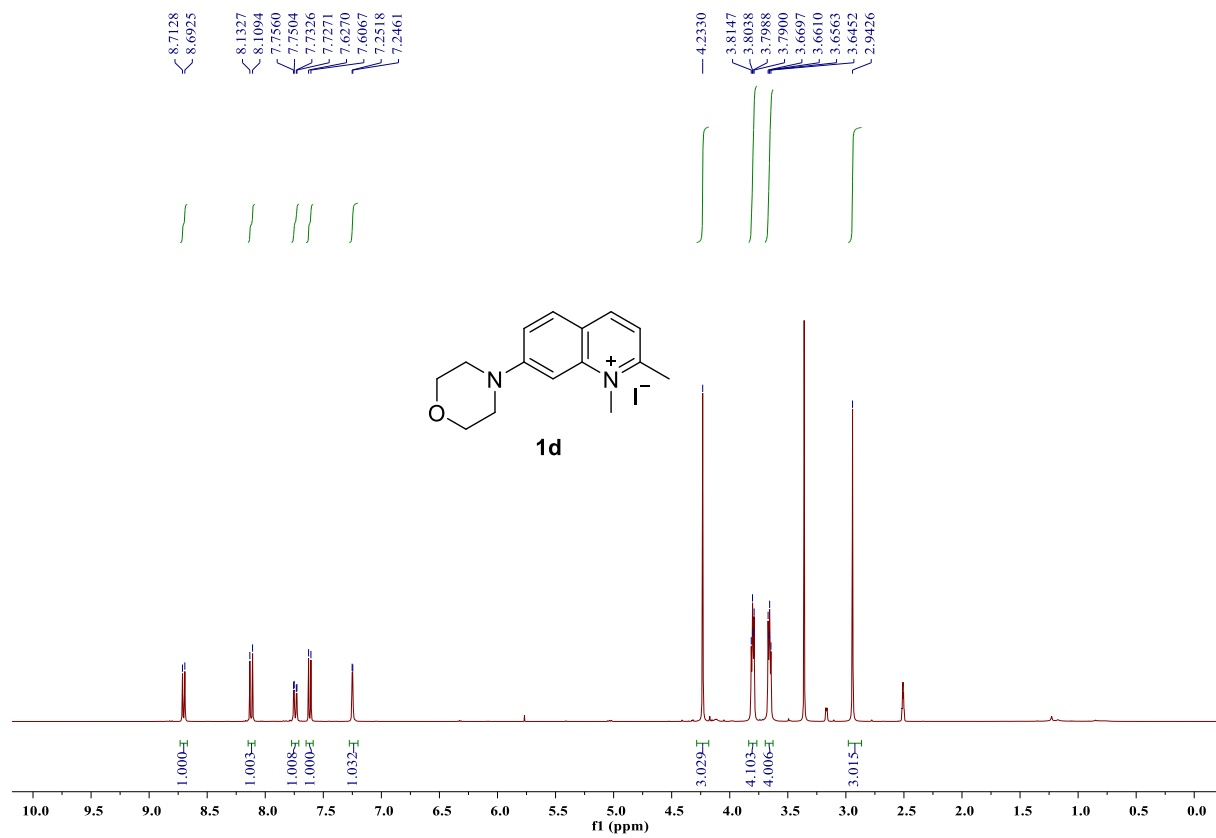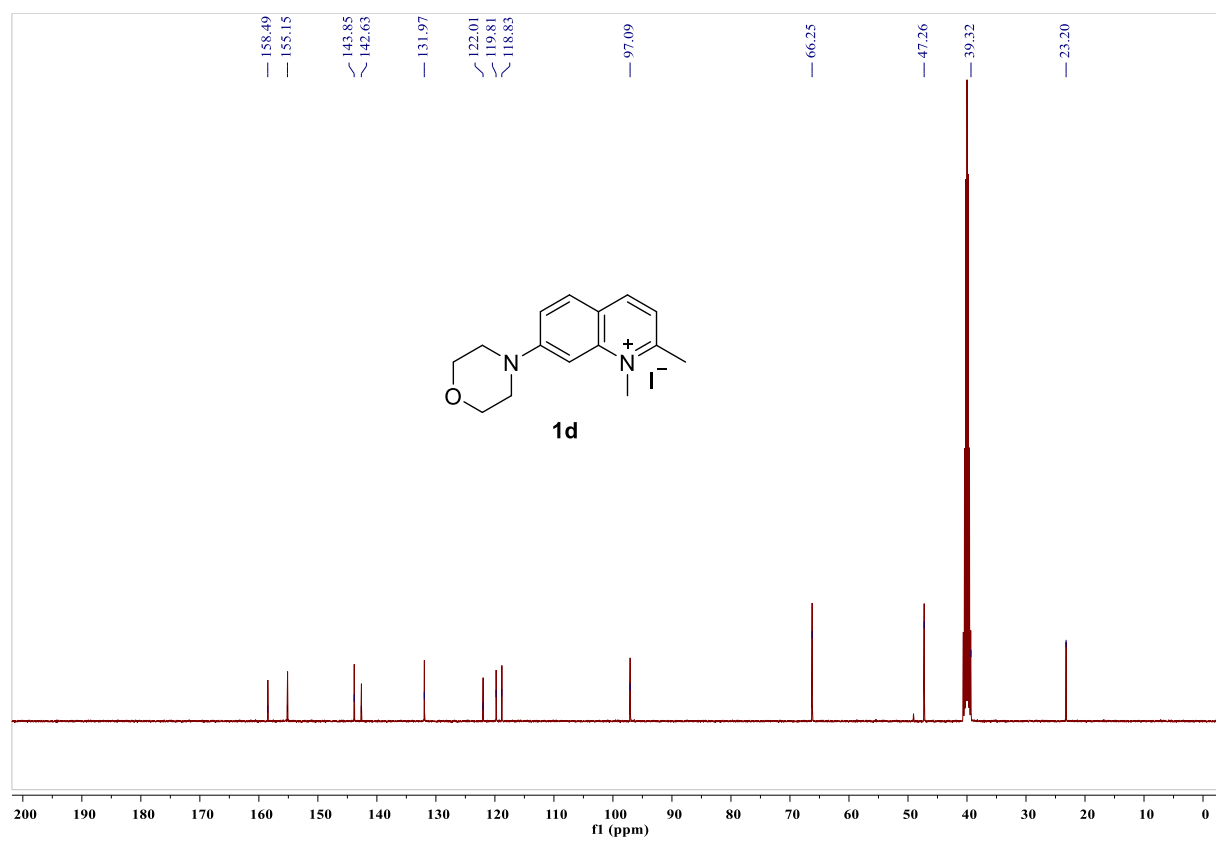

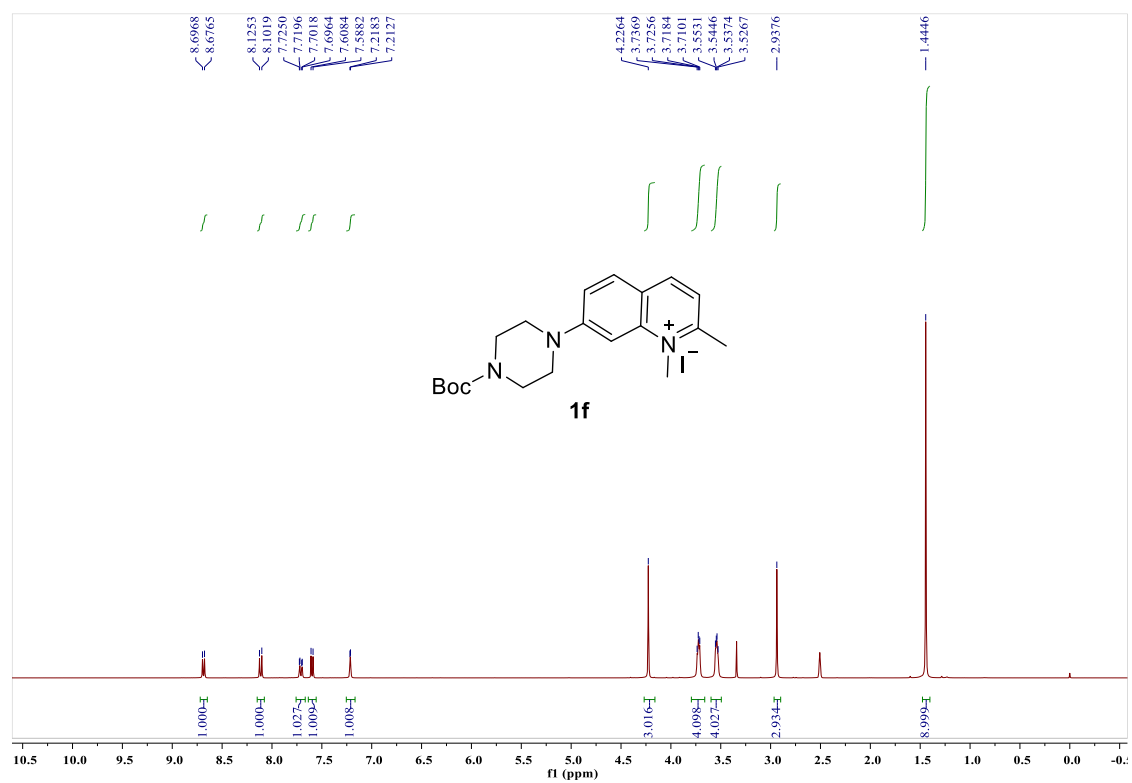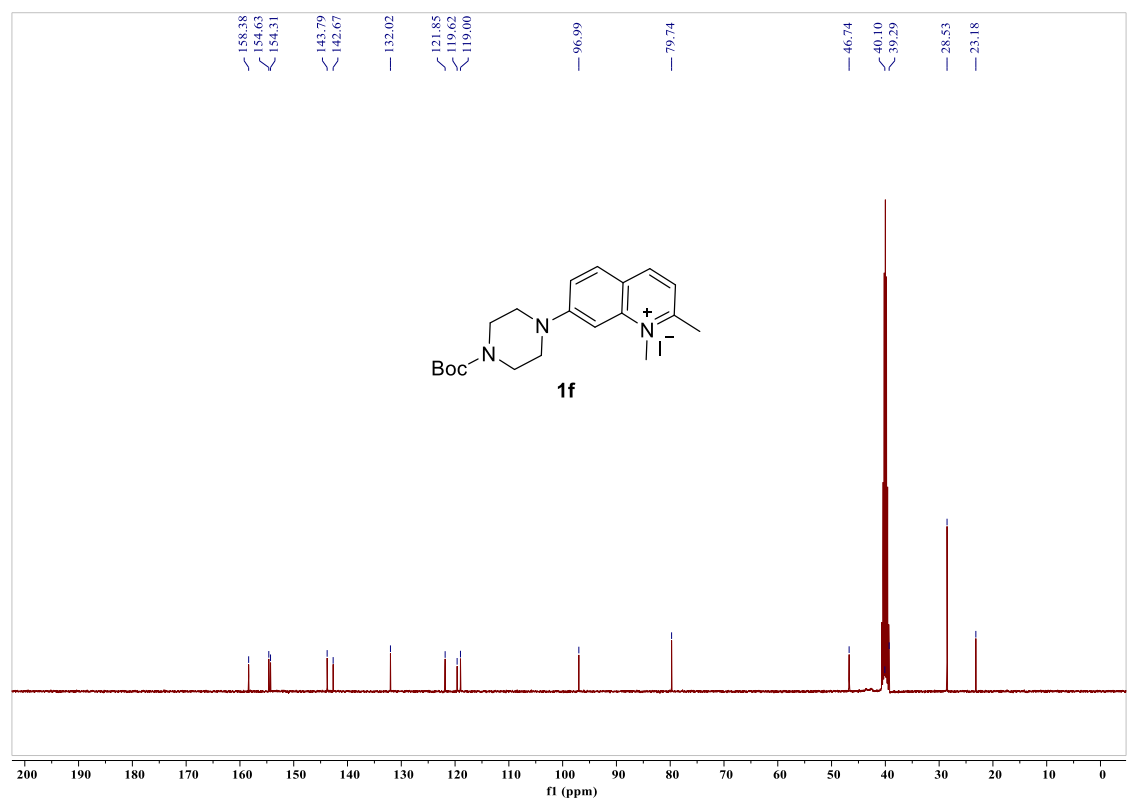



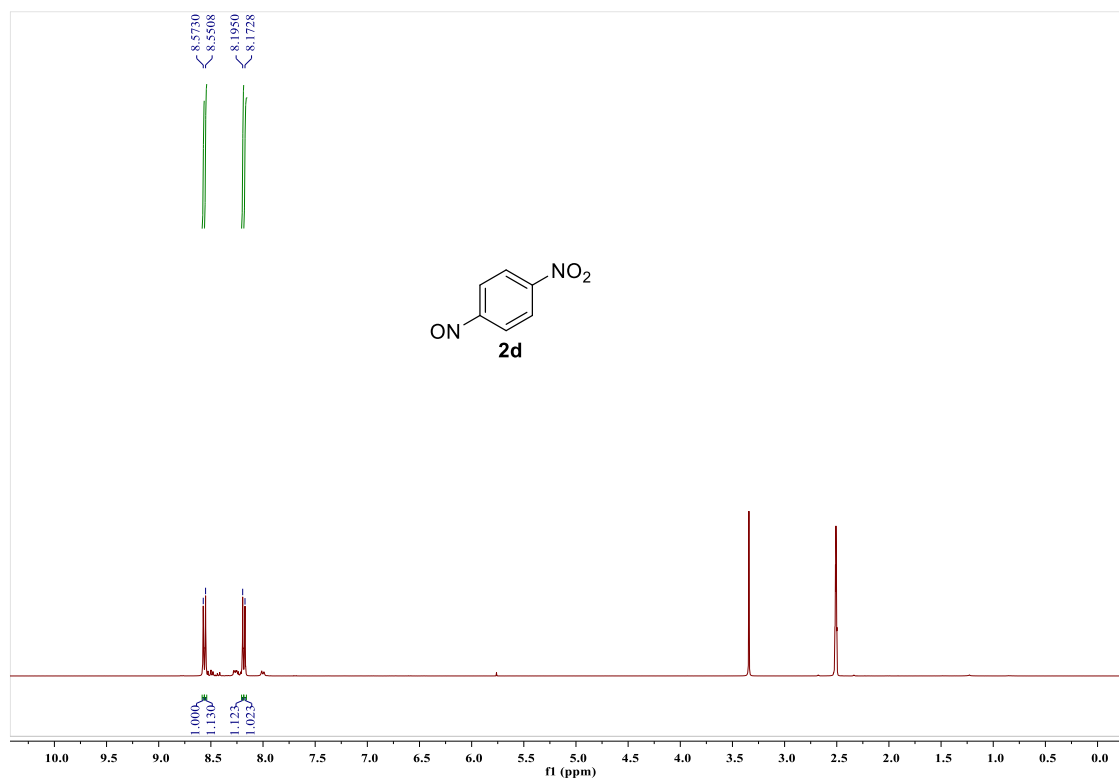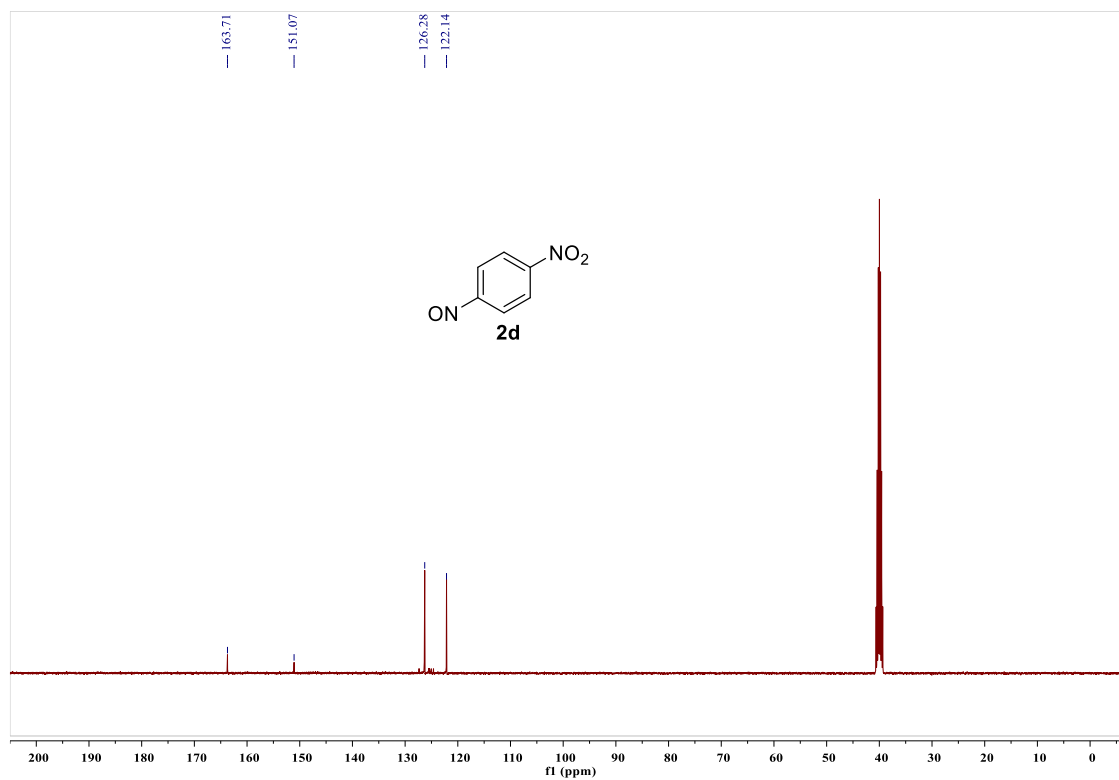

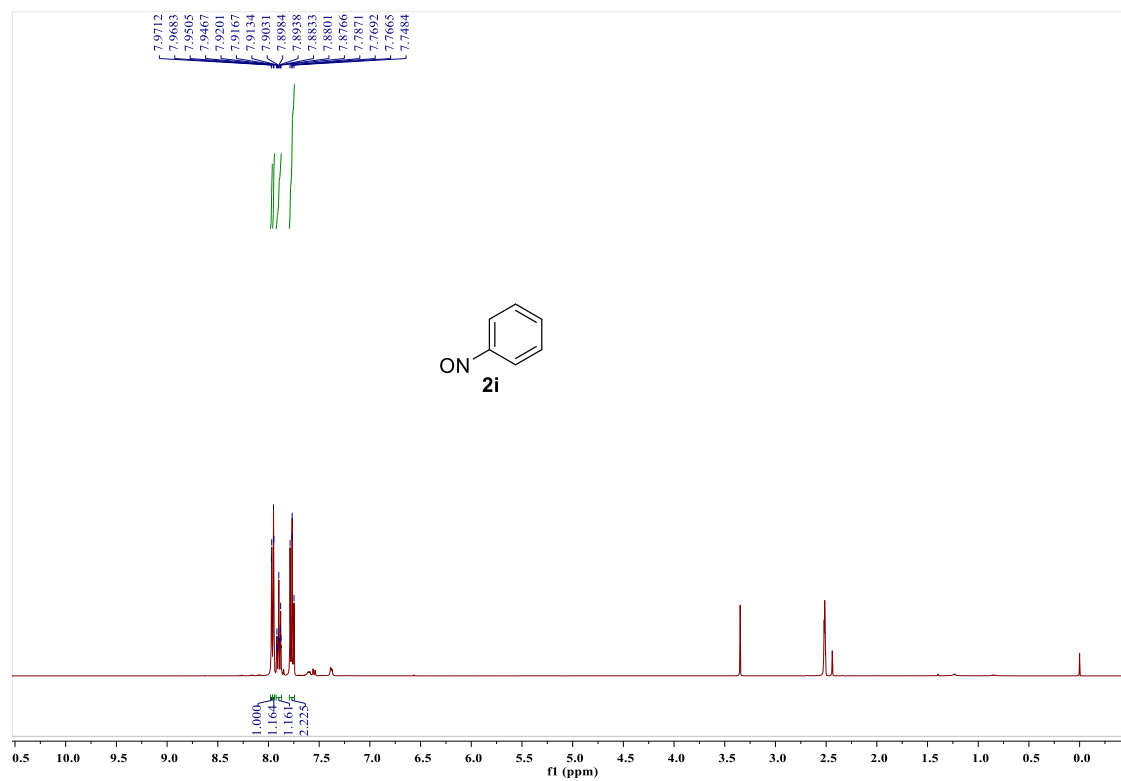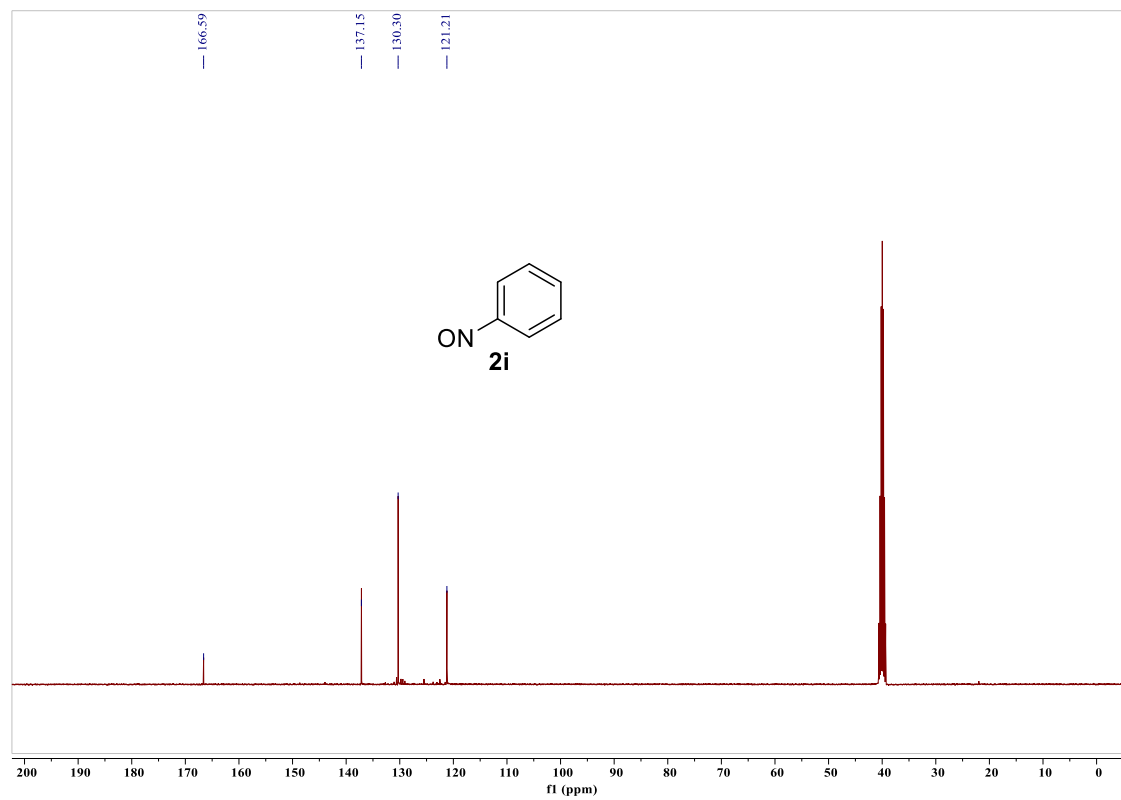

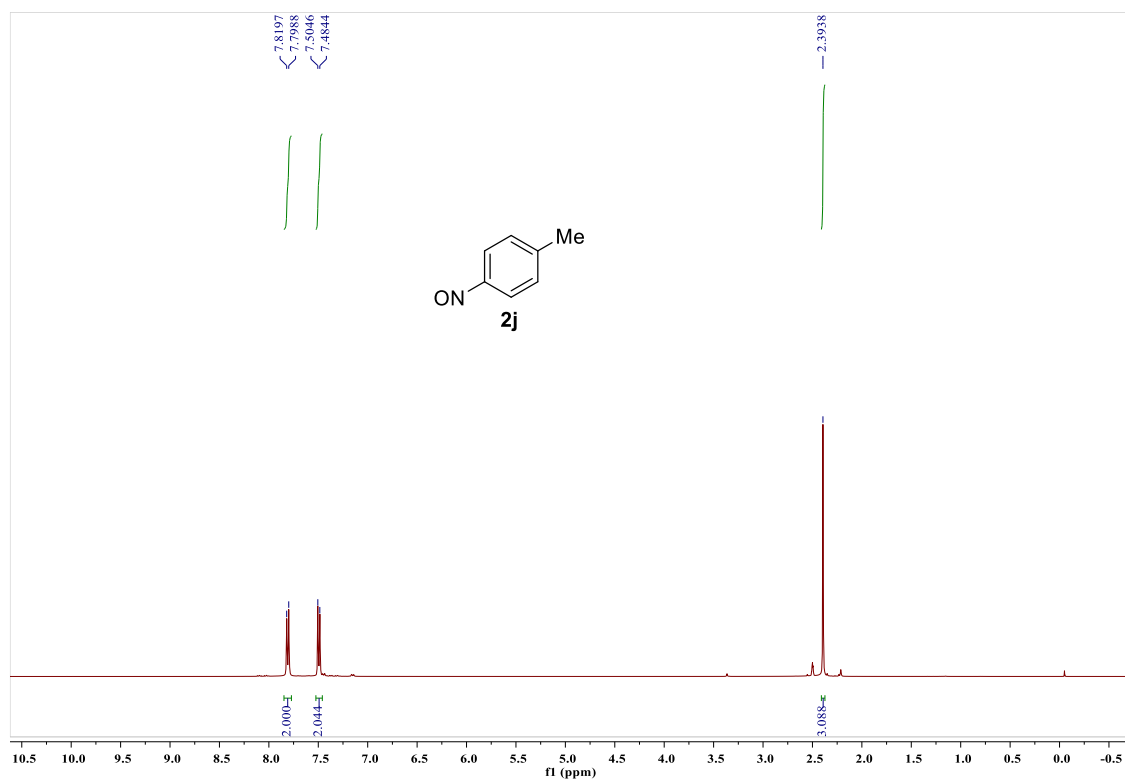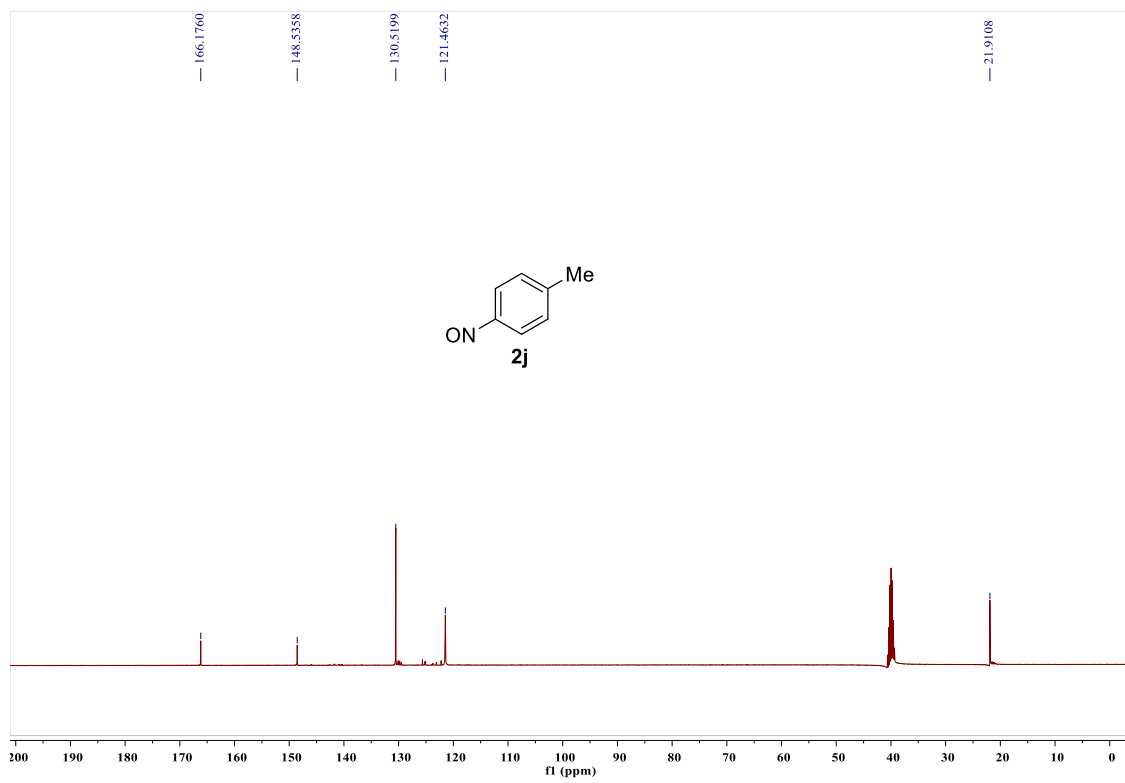

# NMR spectrum for the products and synthetic application product

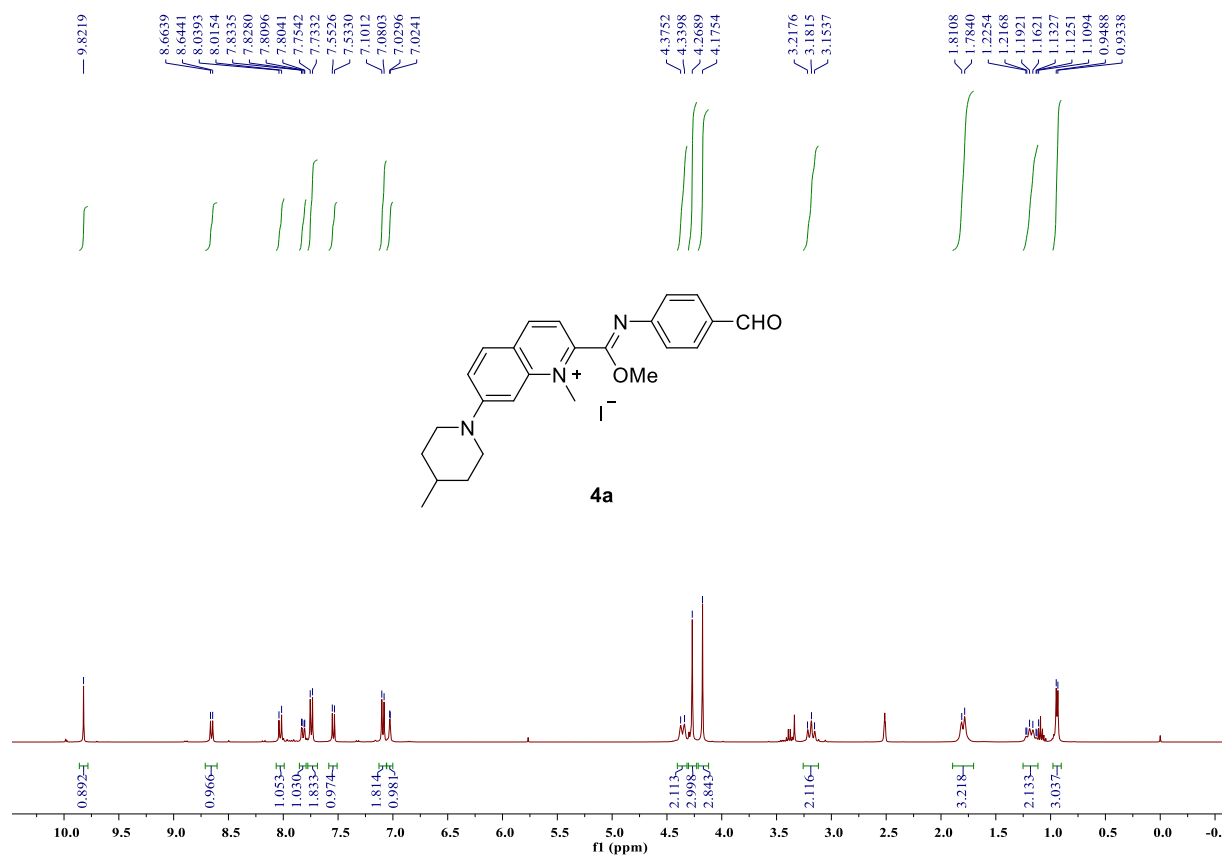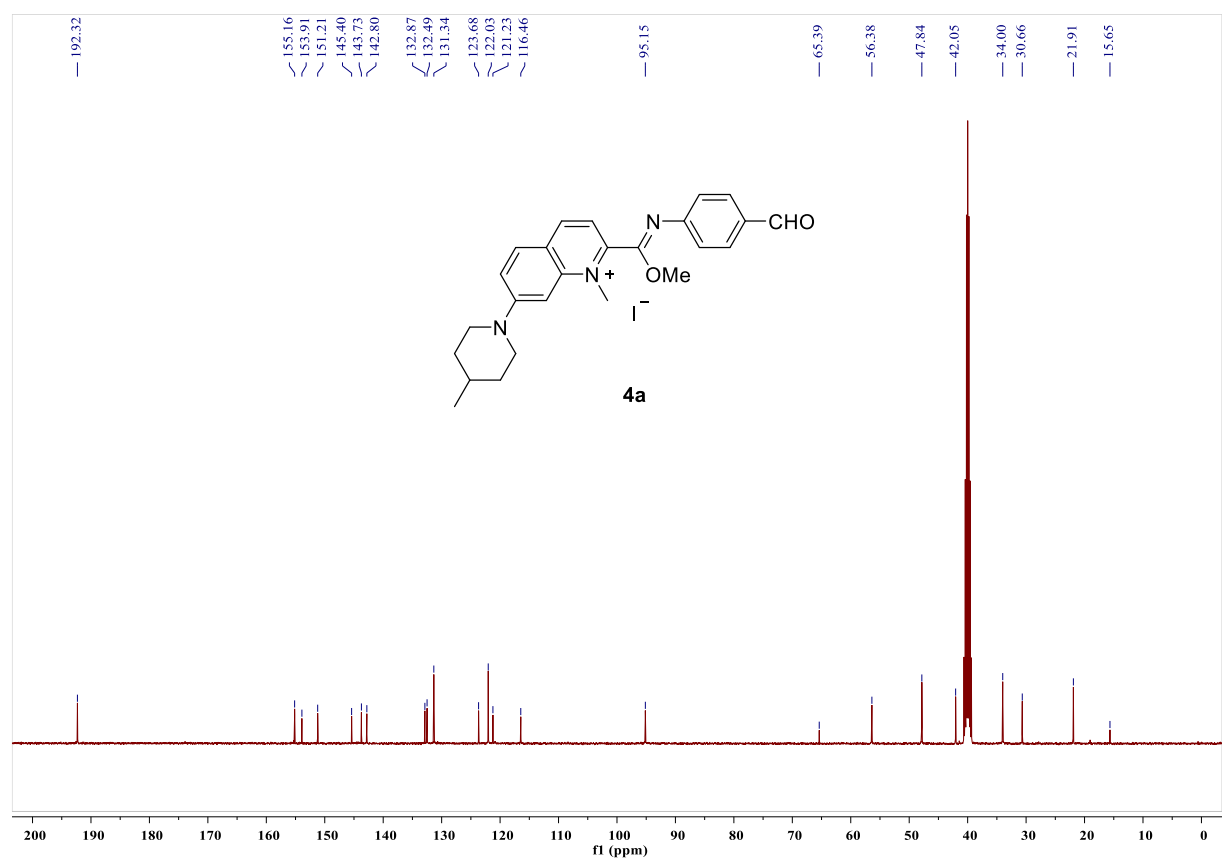

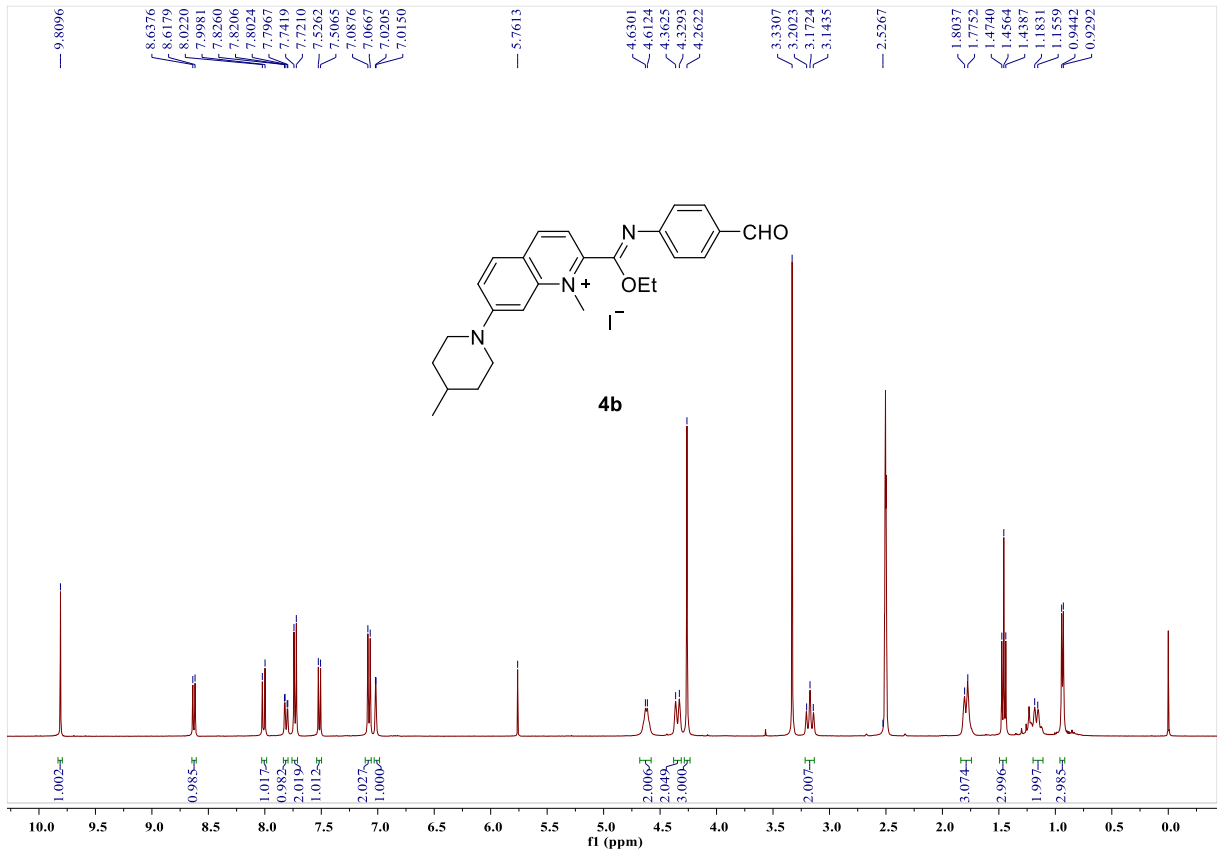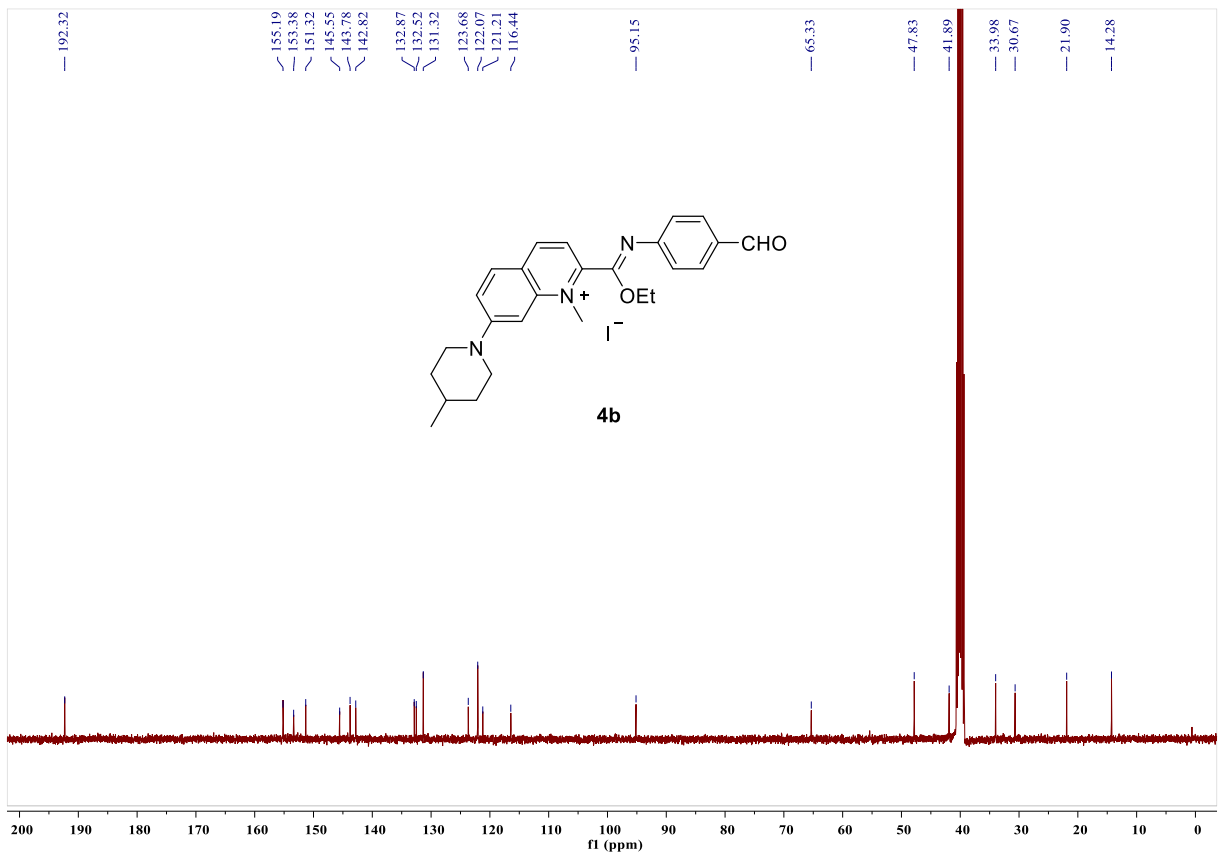

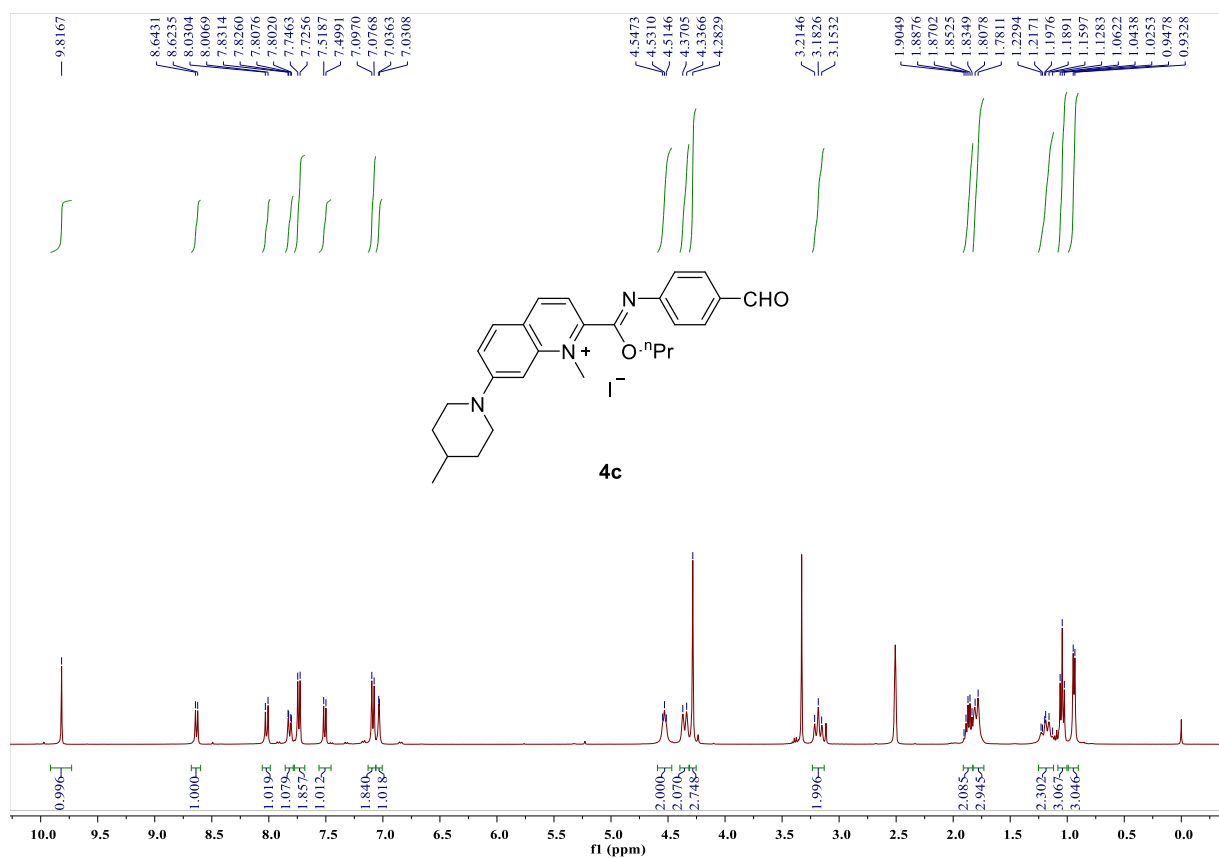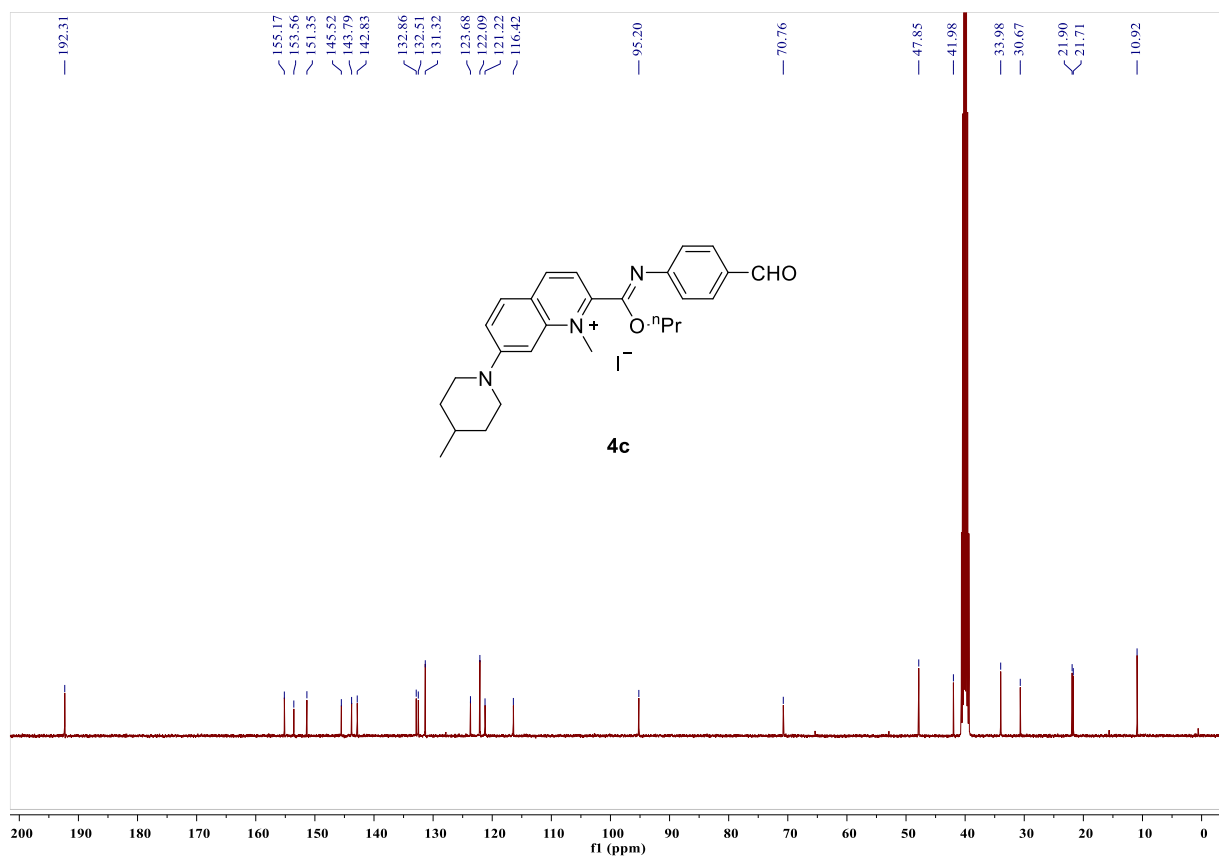

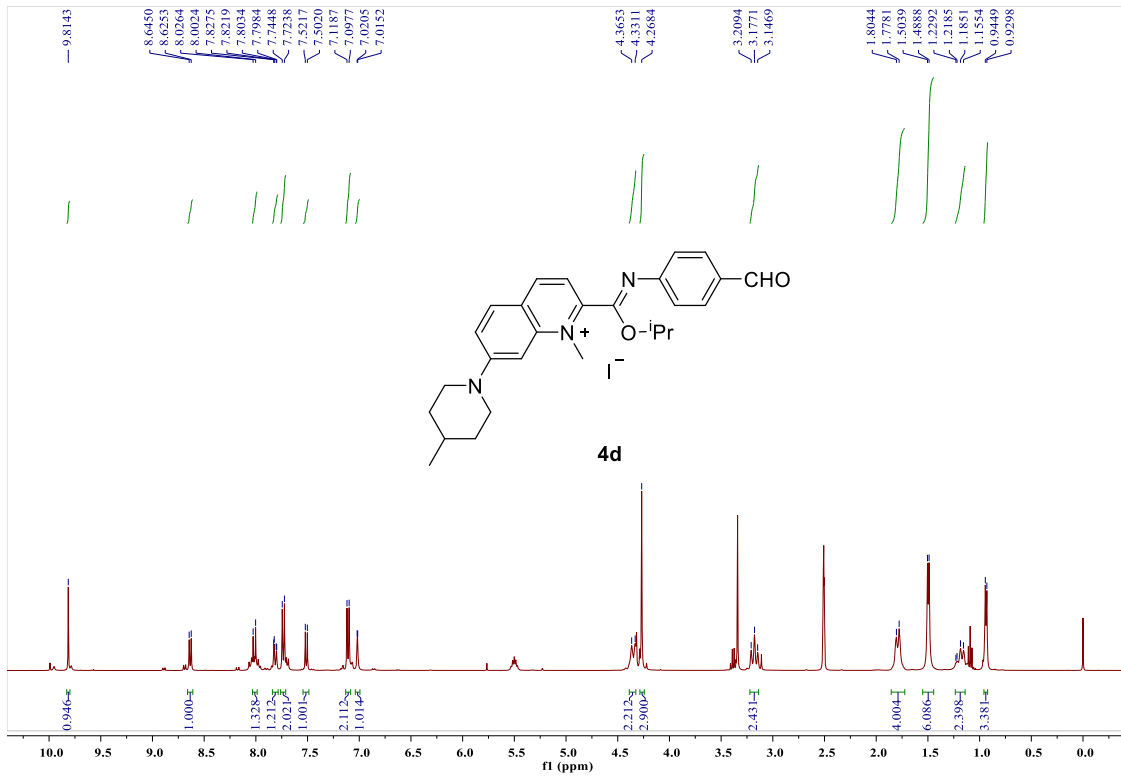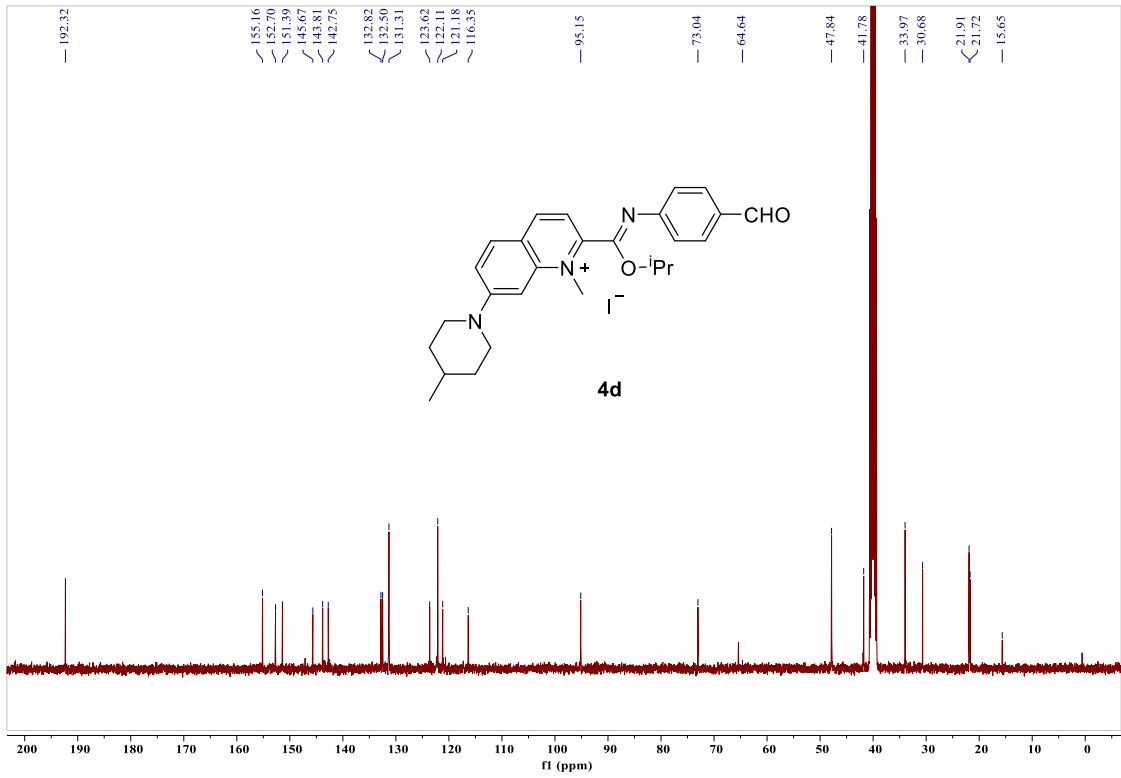

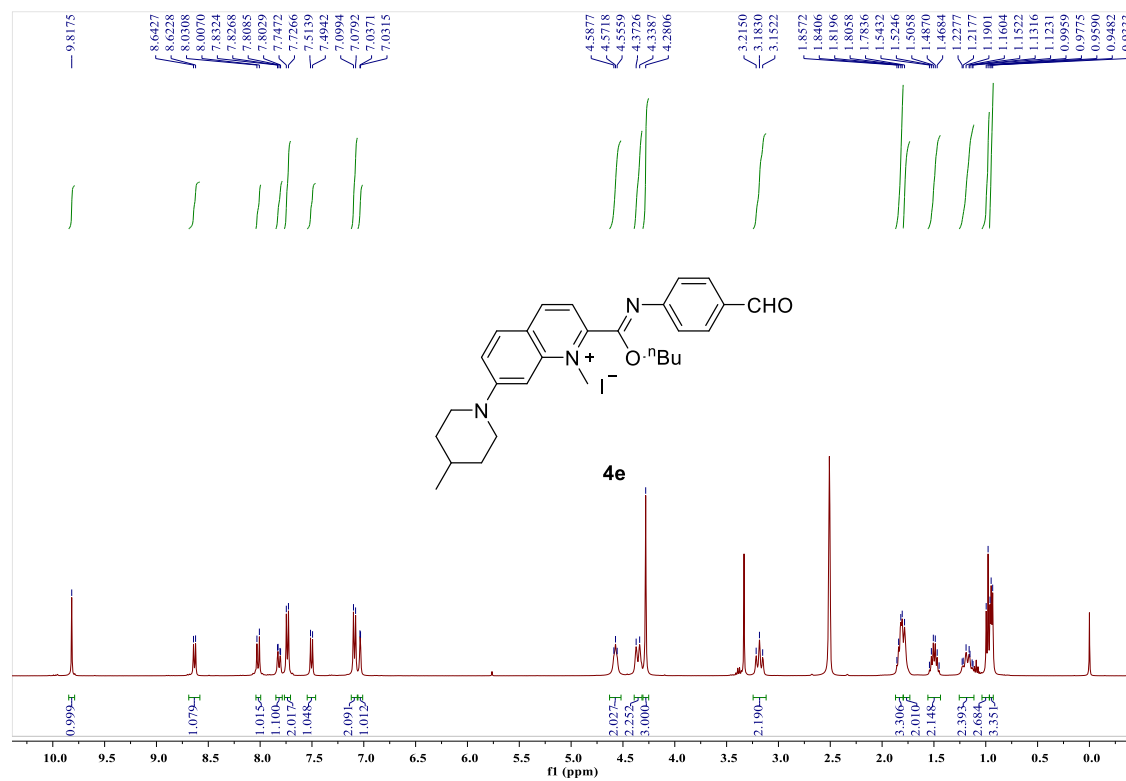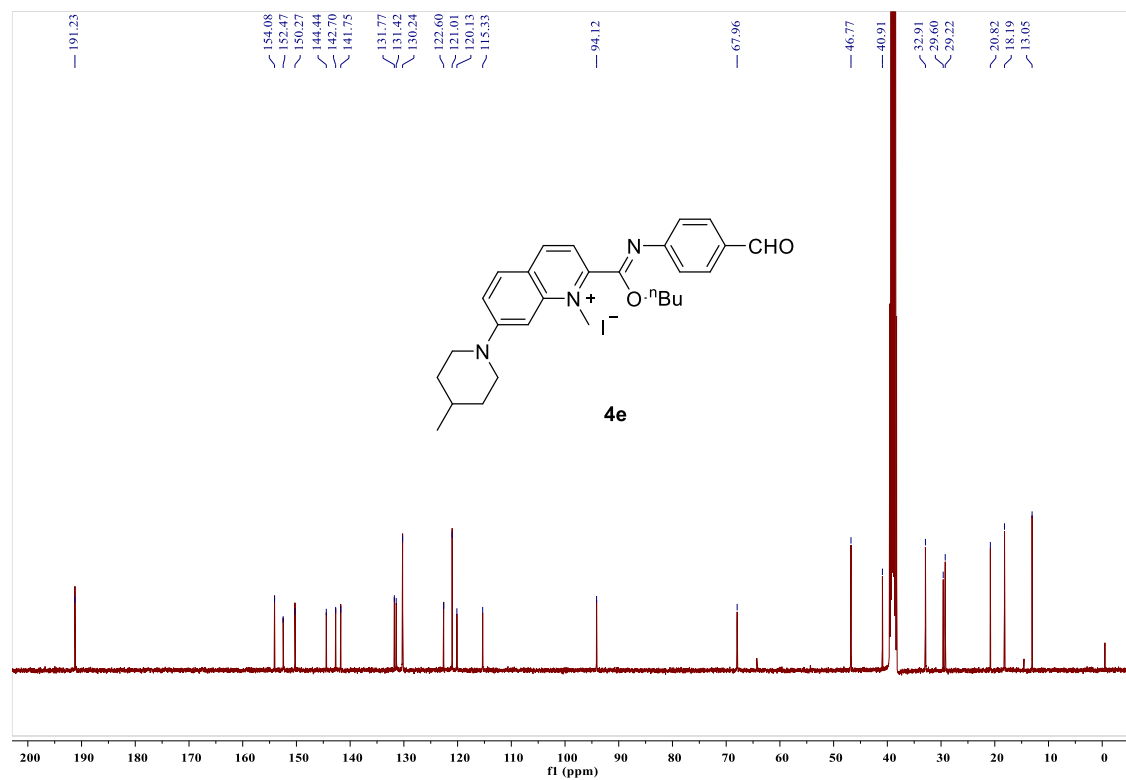



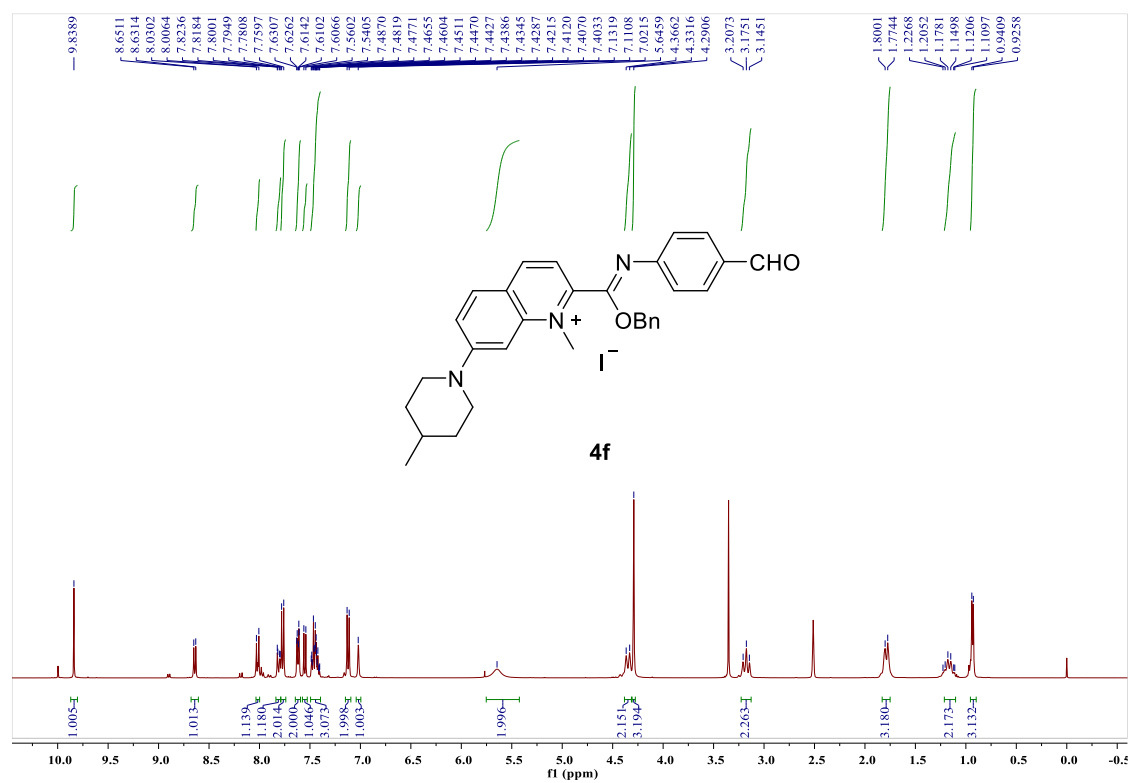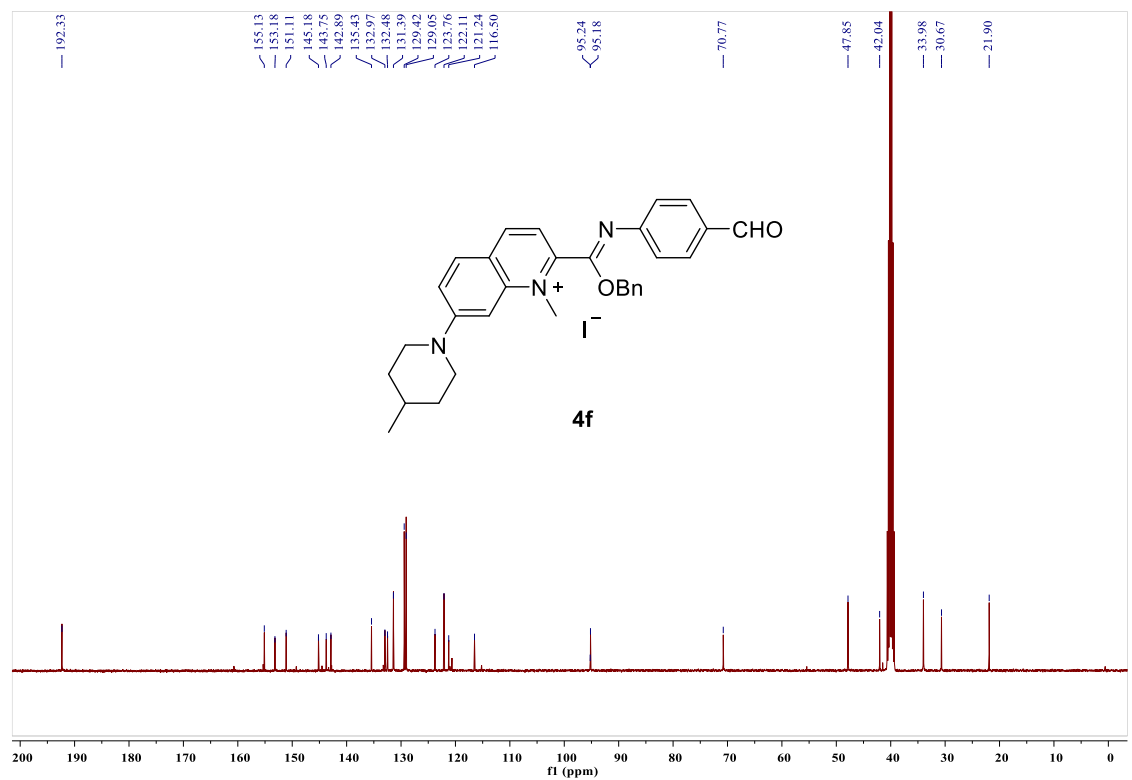

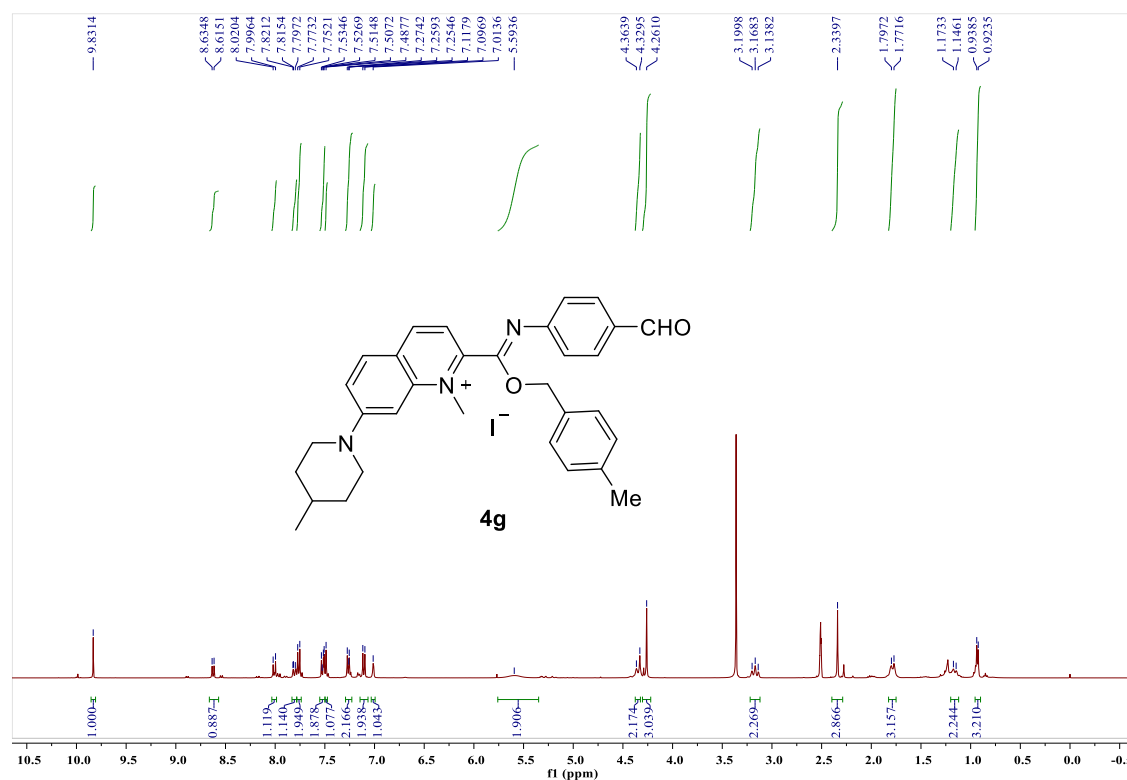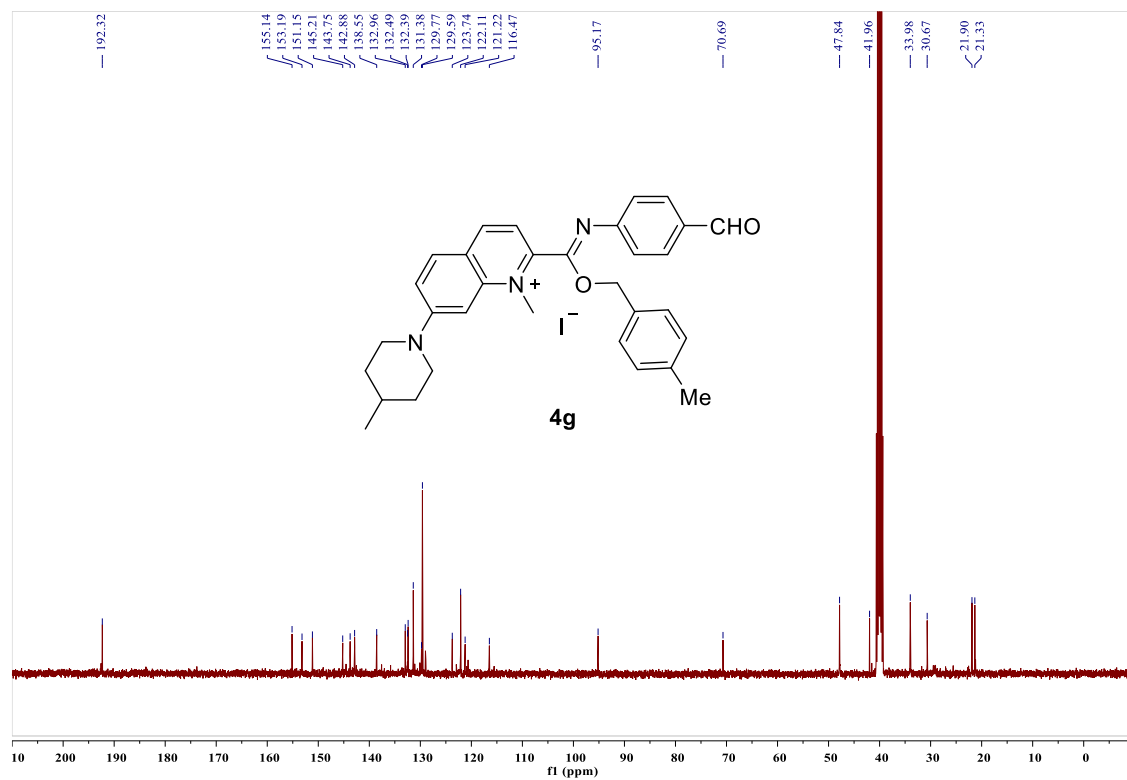

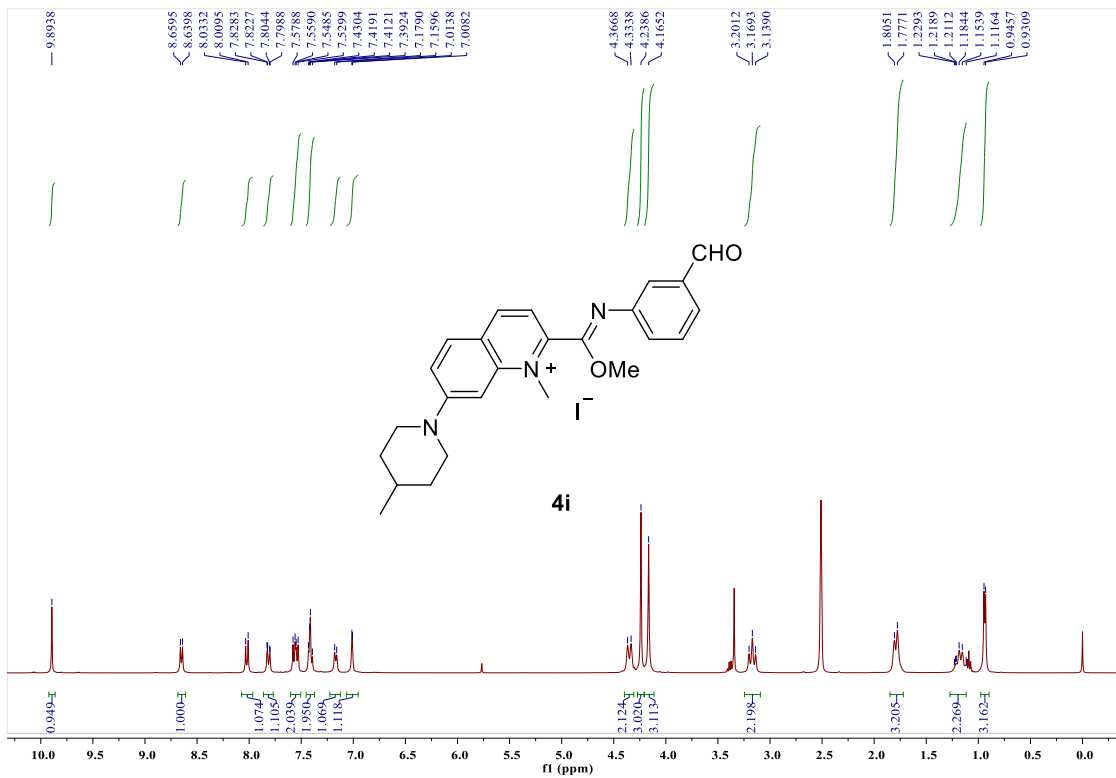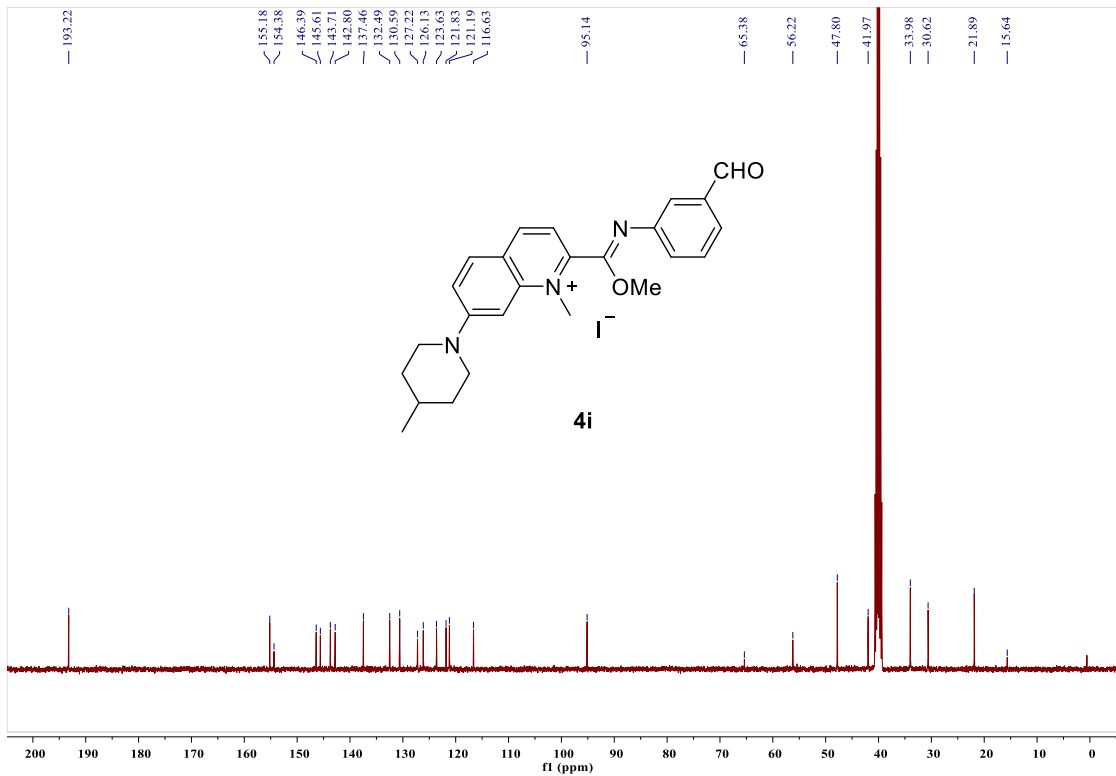

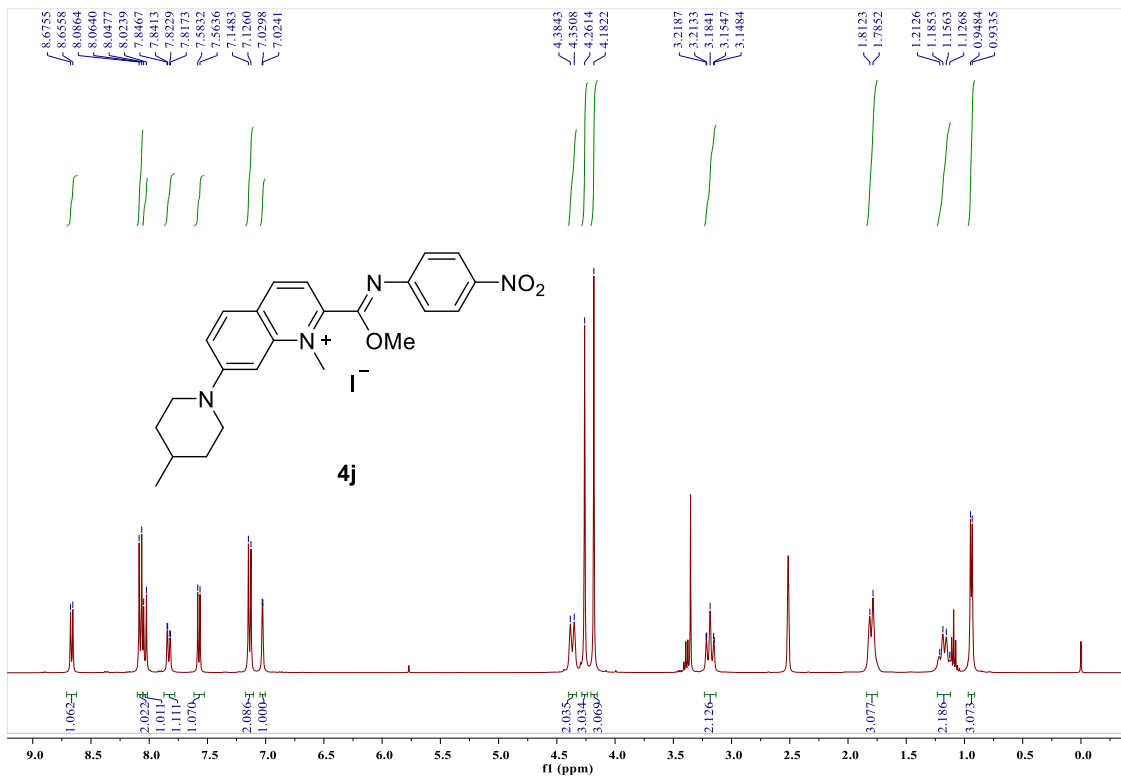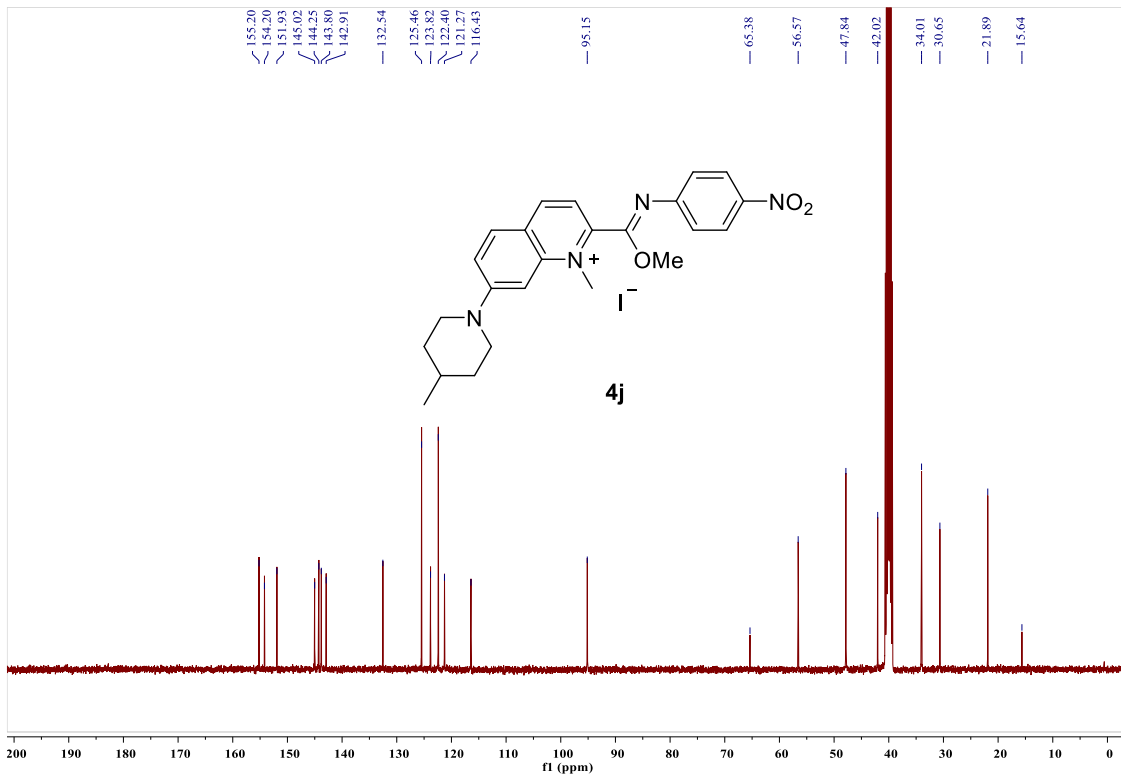

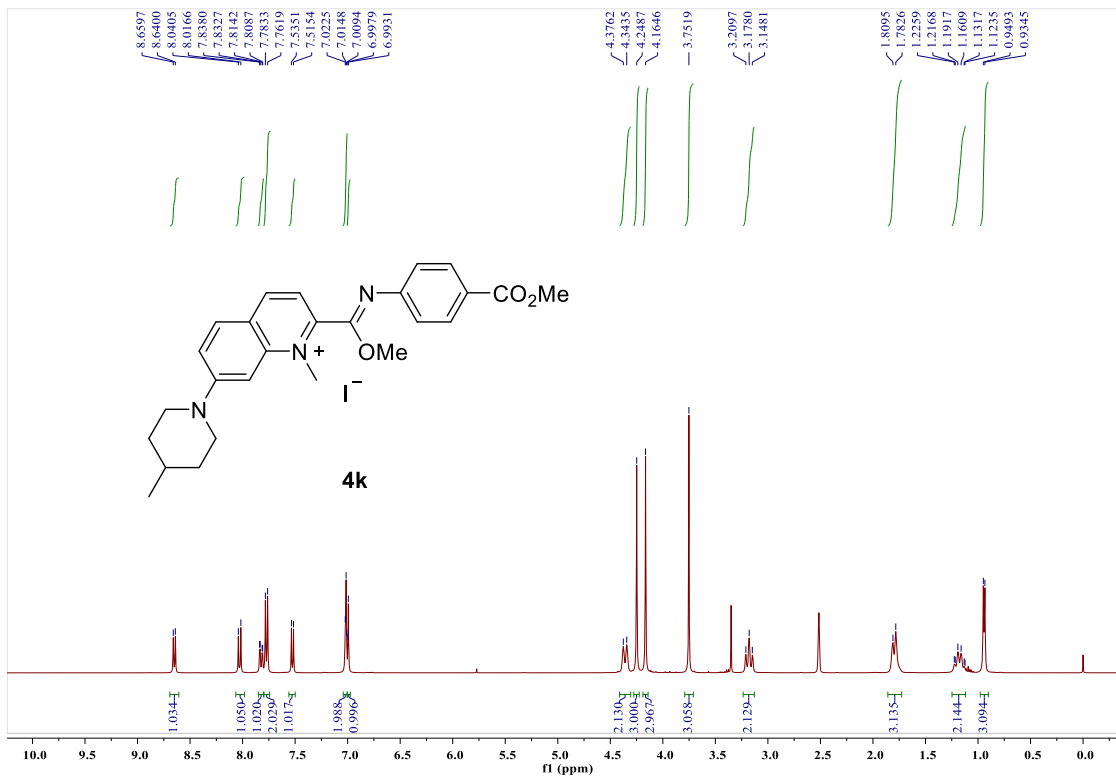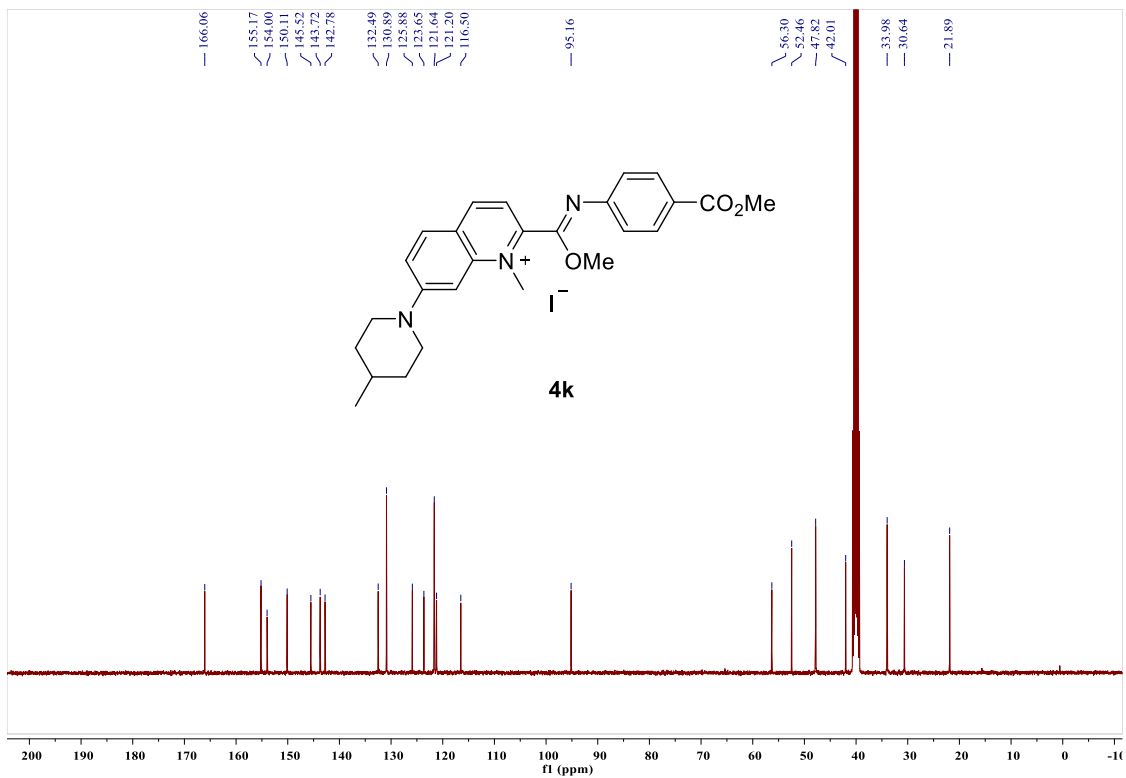

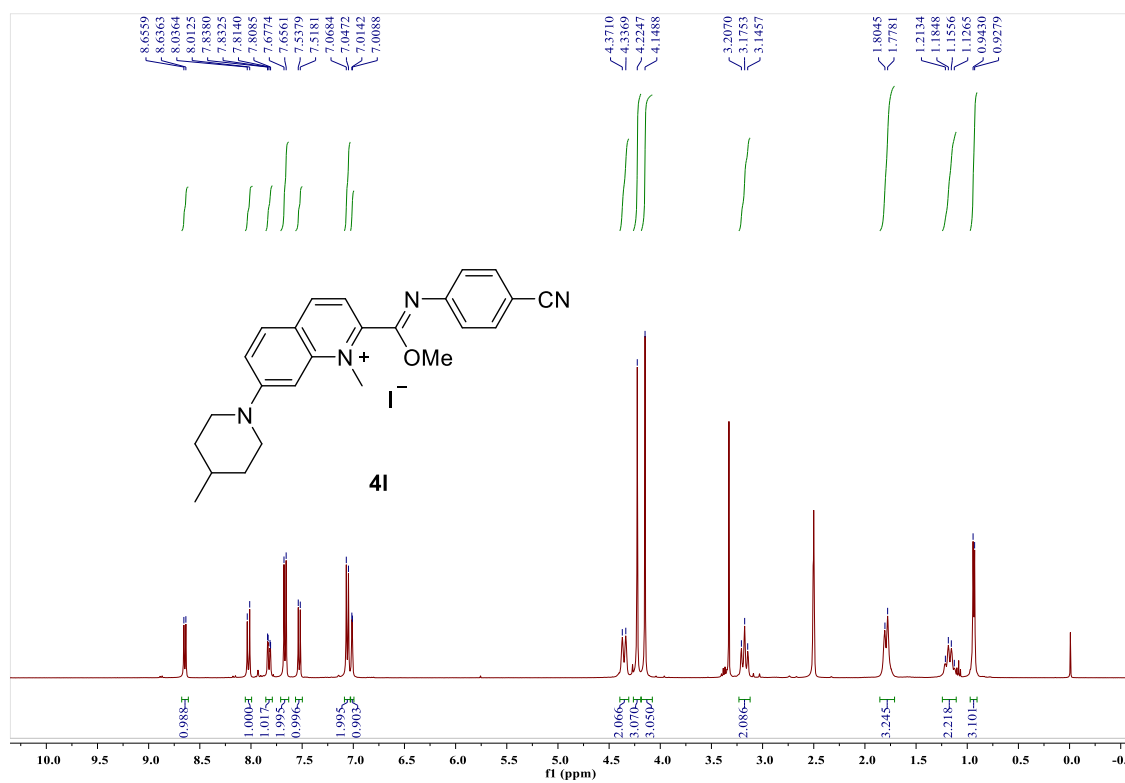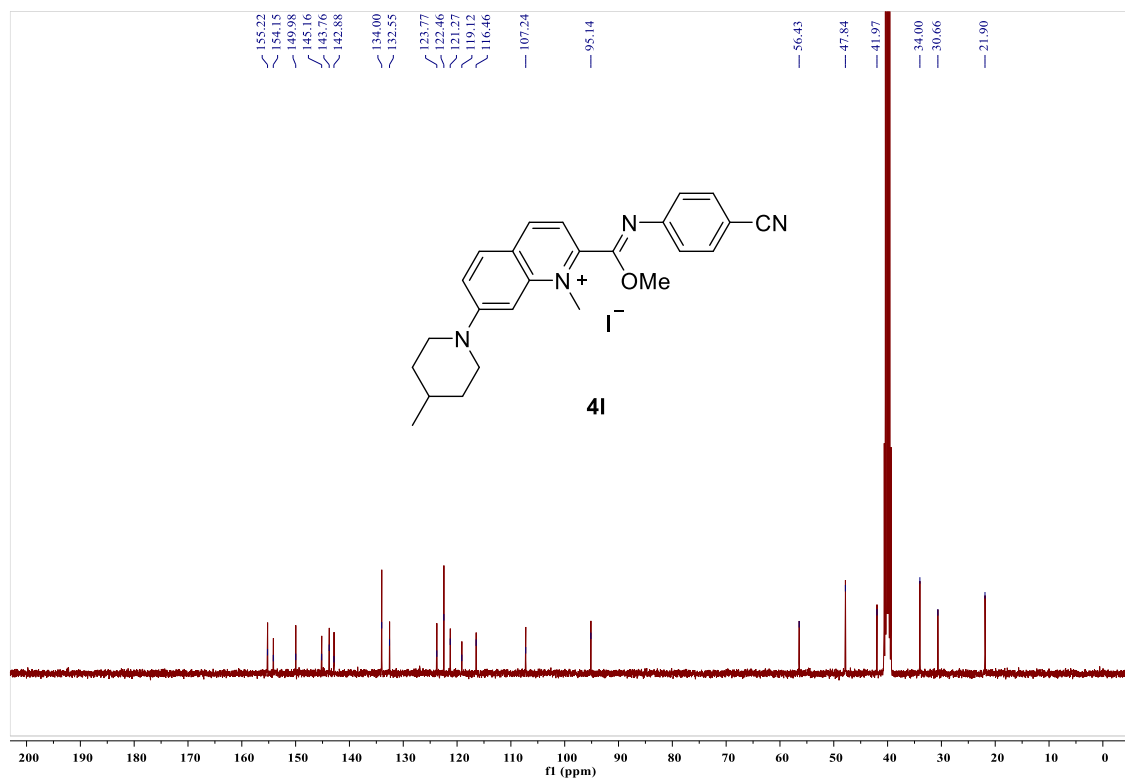

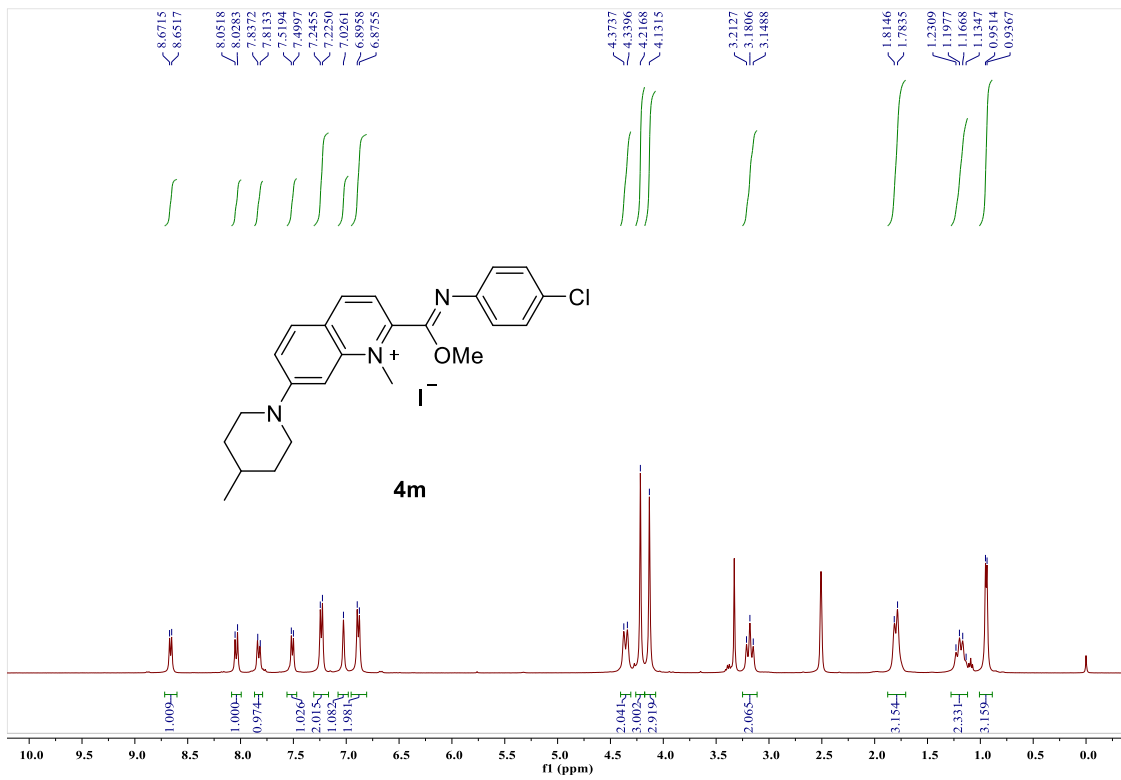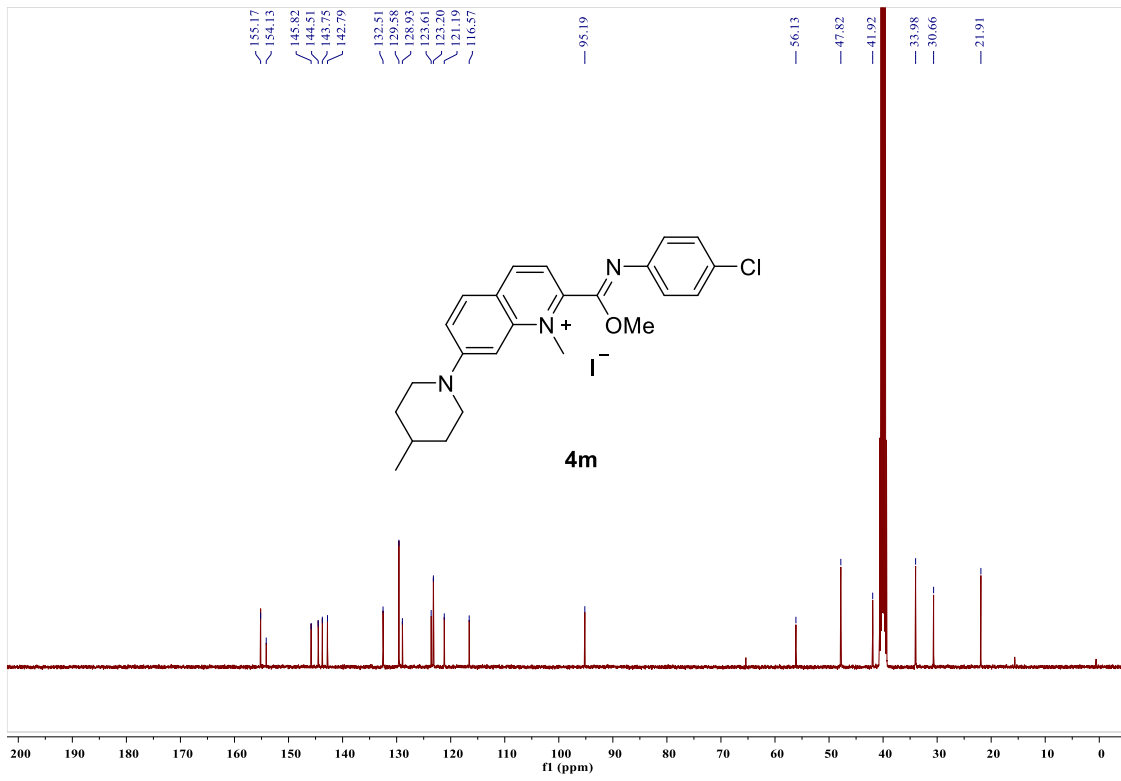

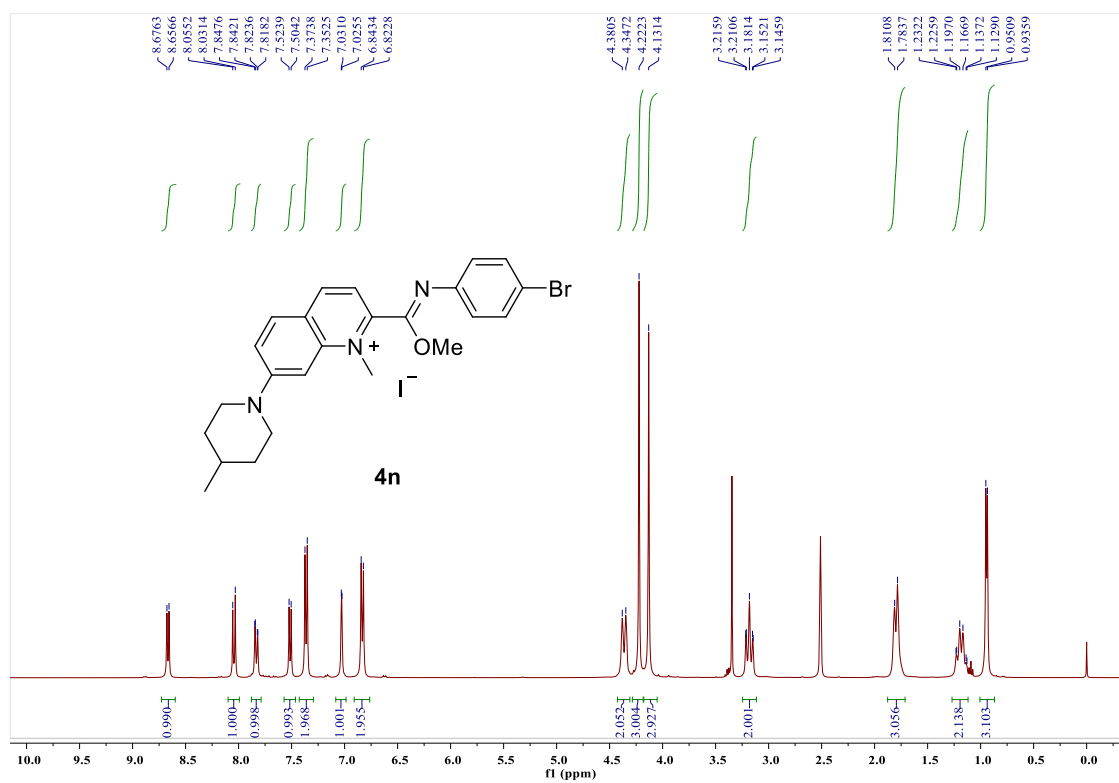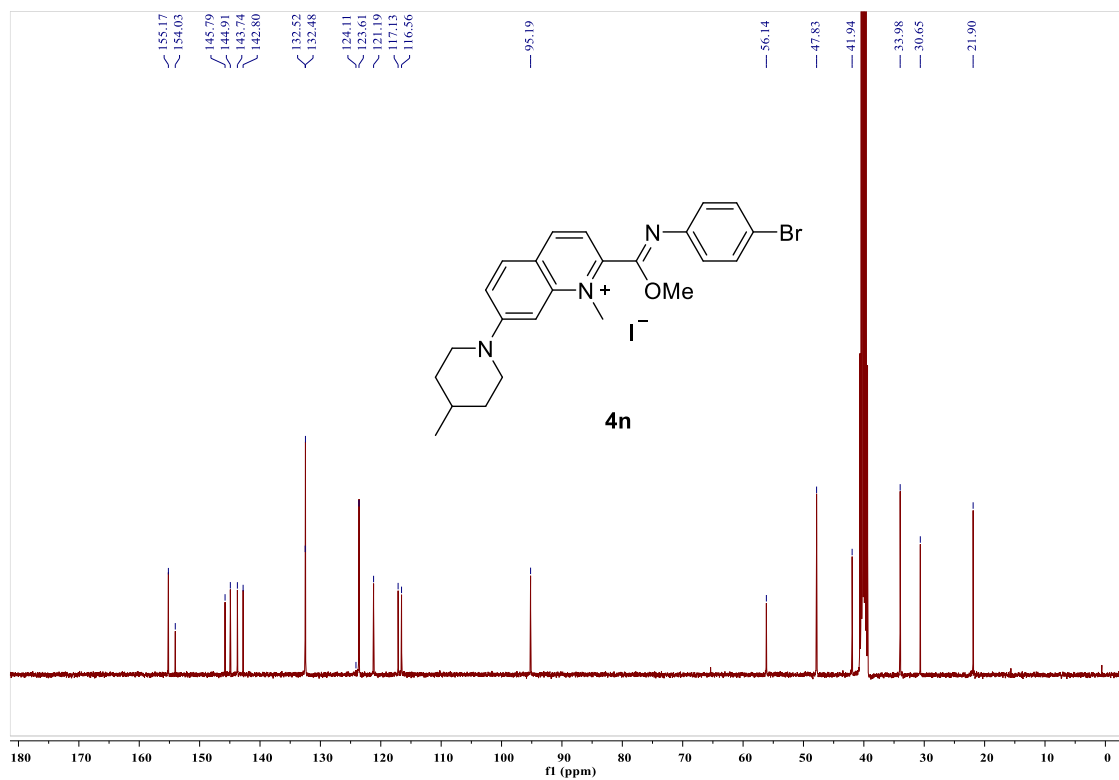



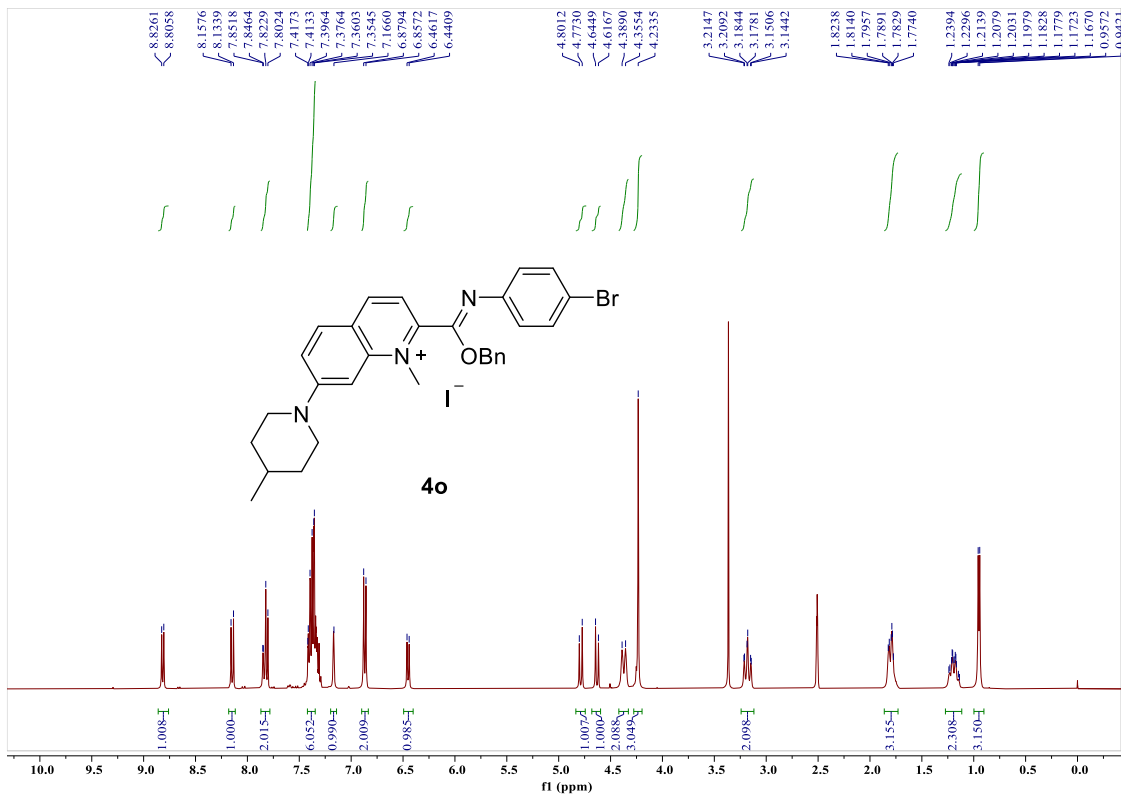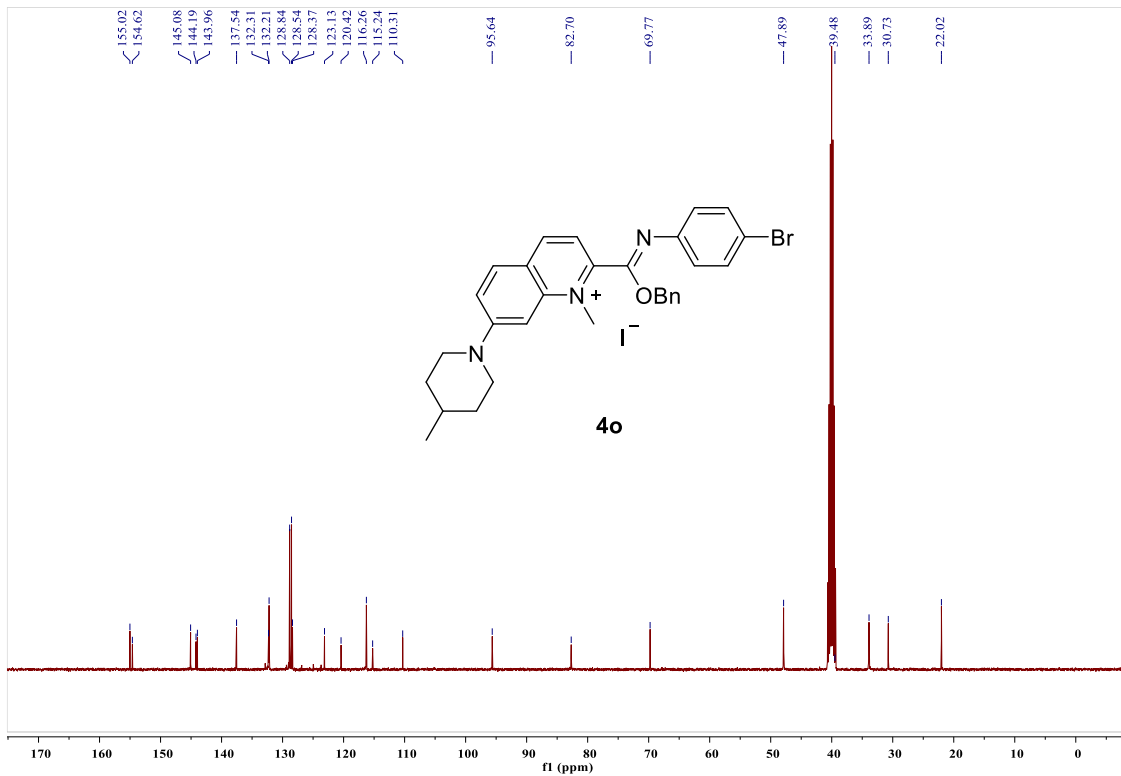

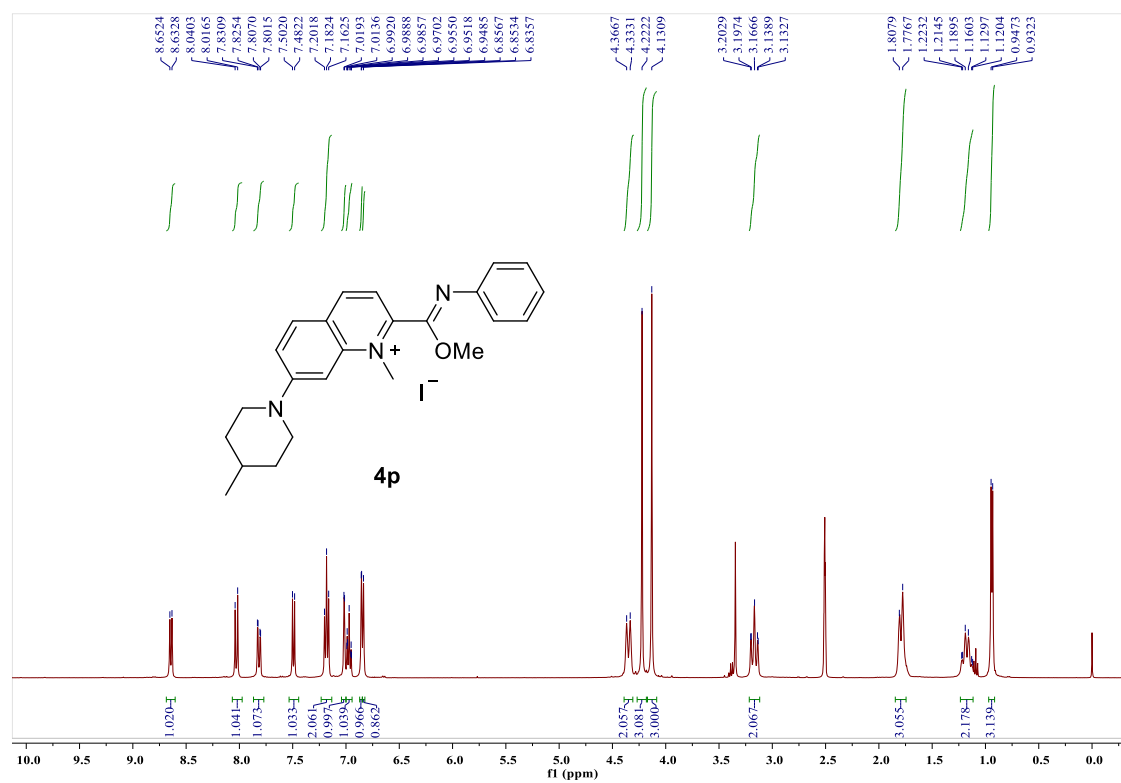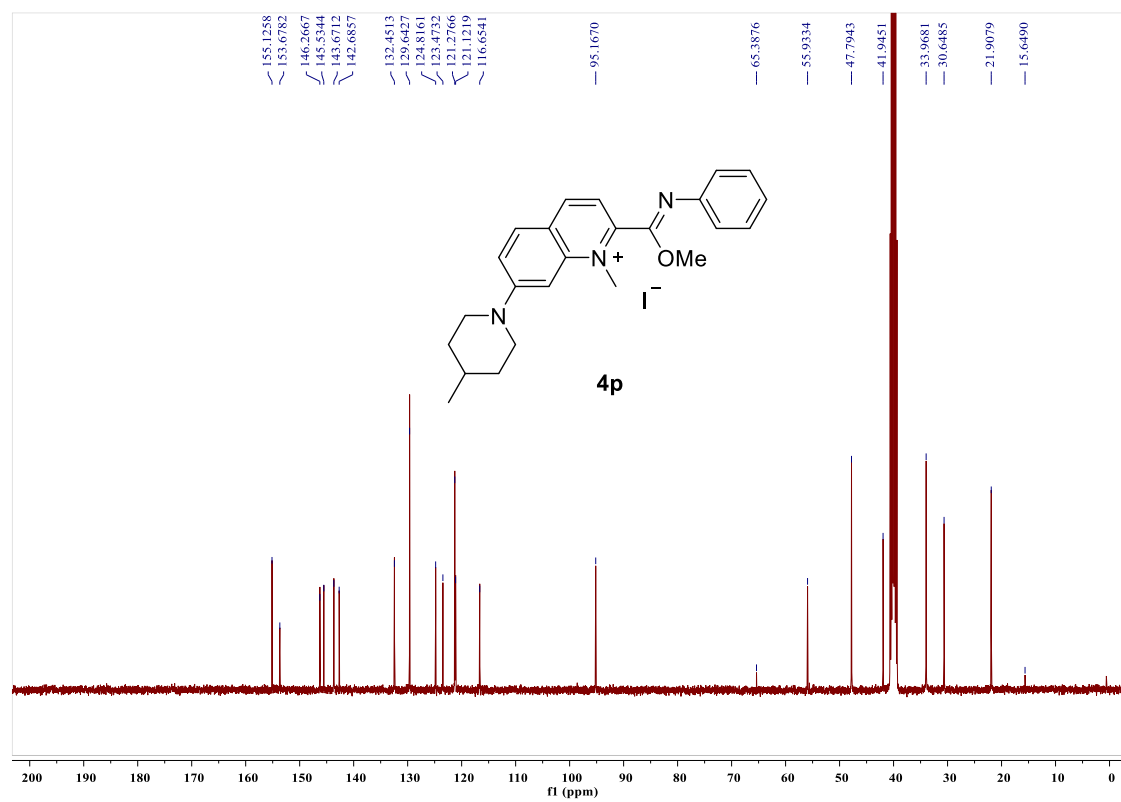

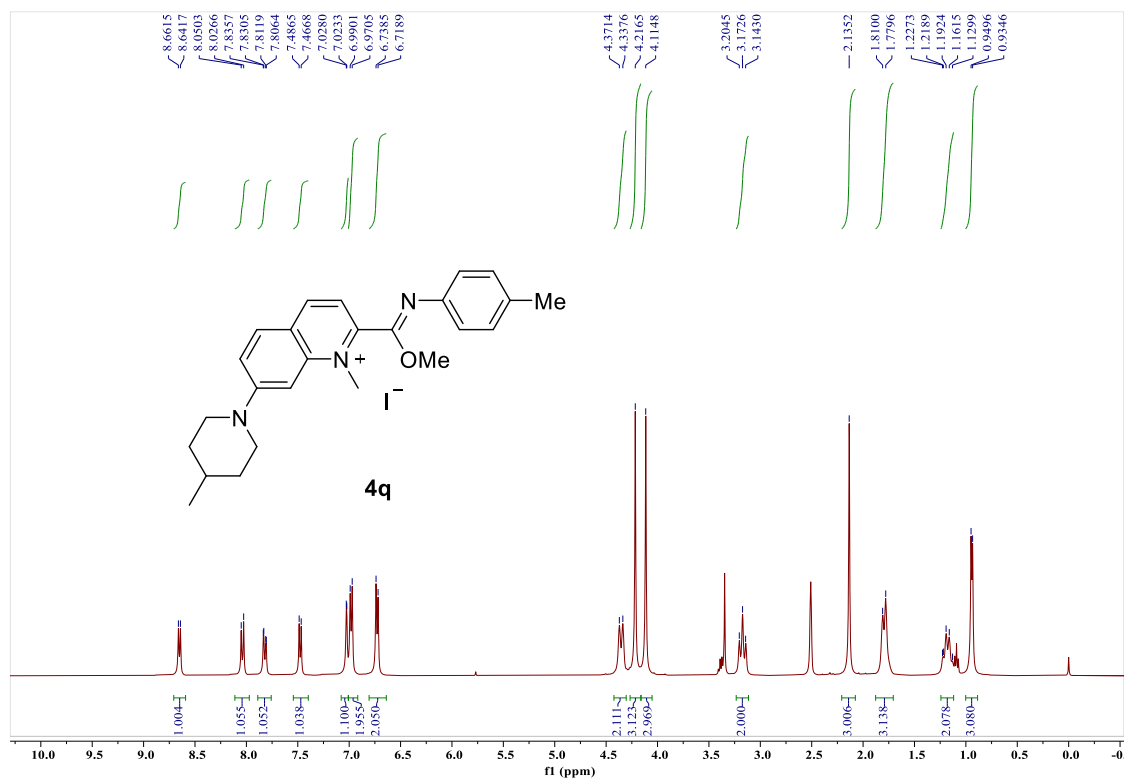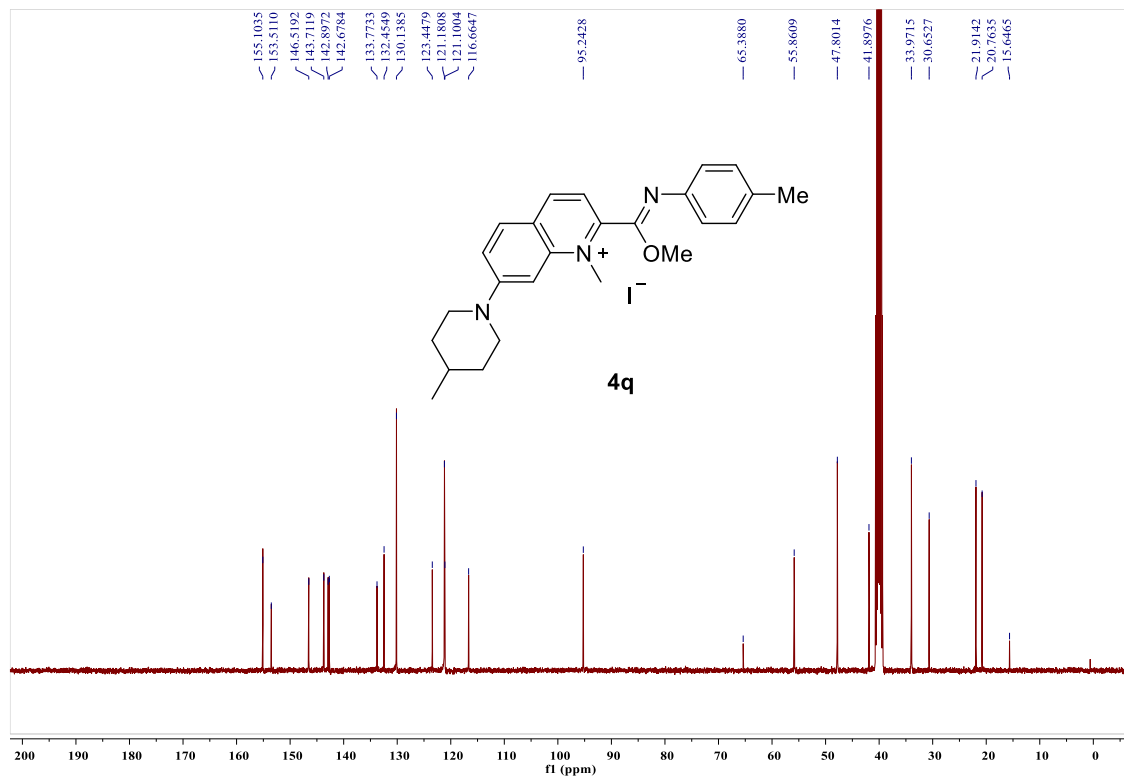

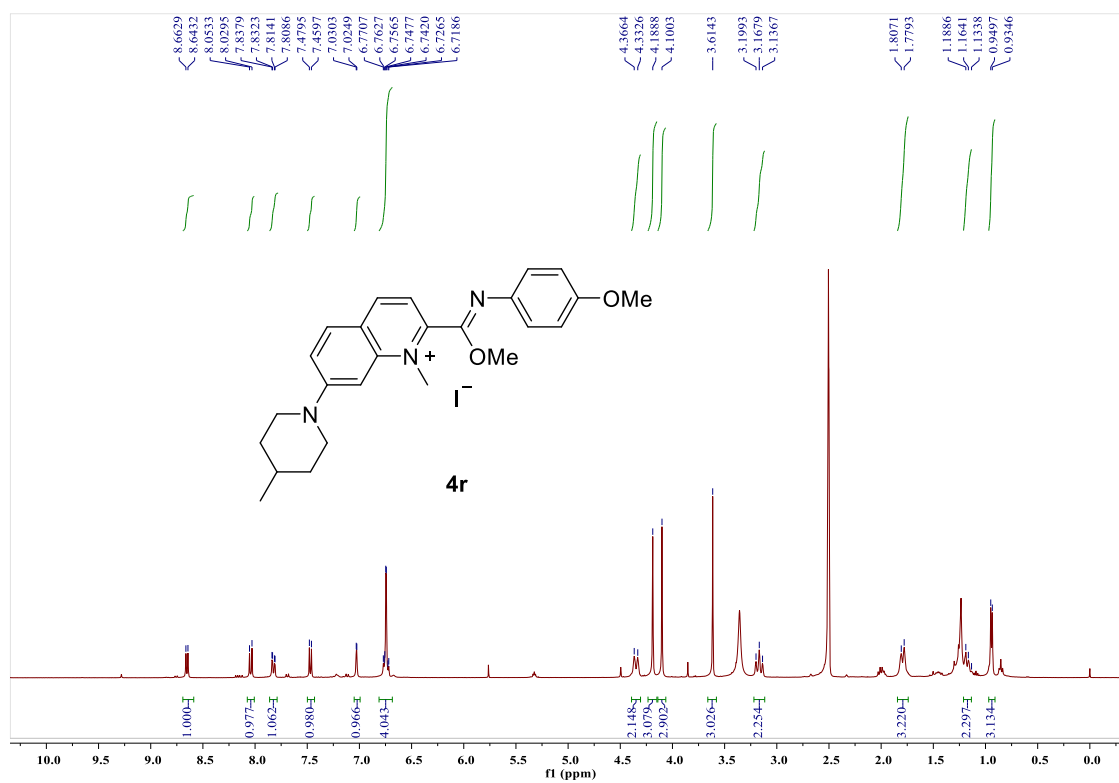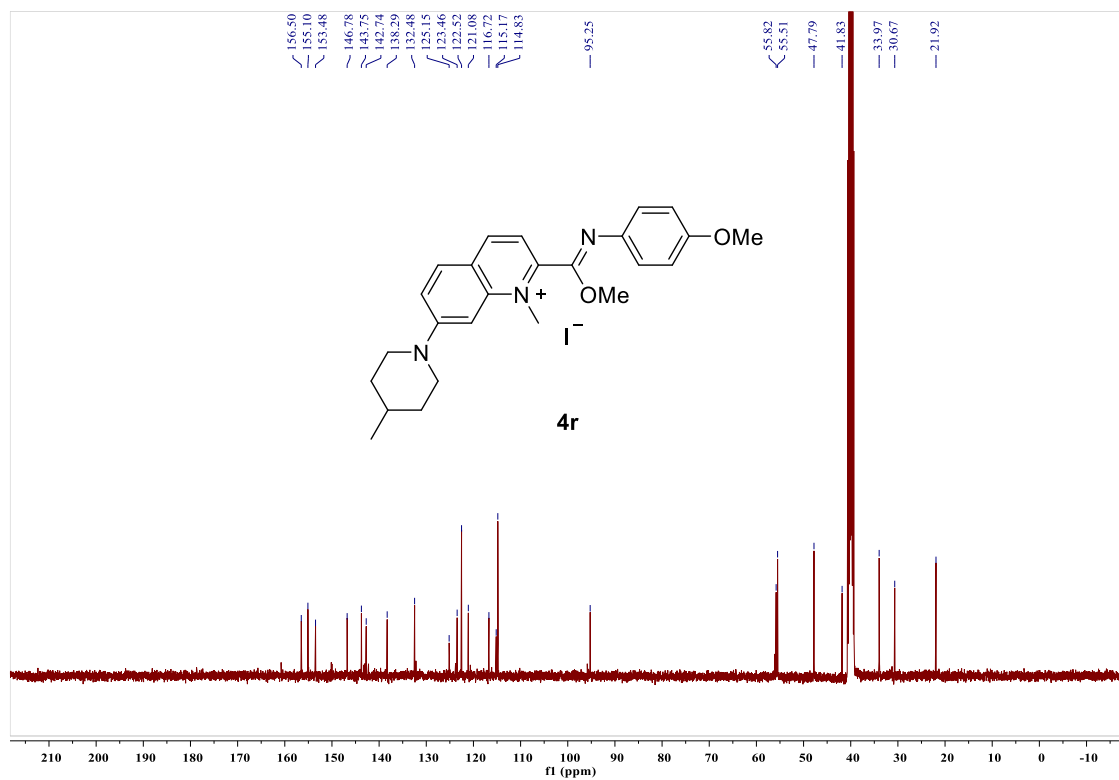

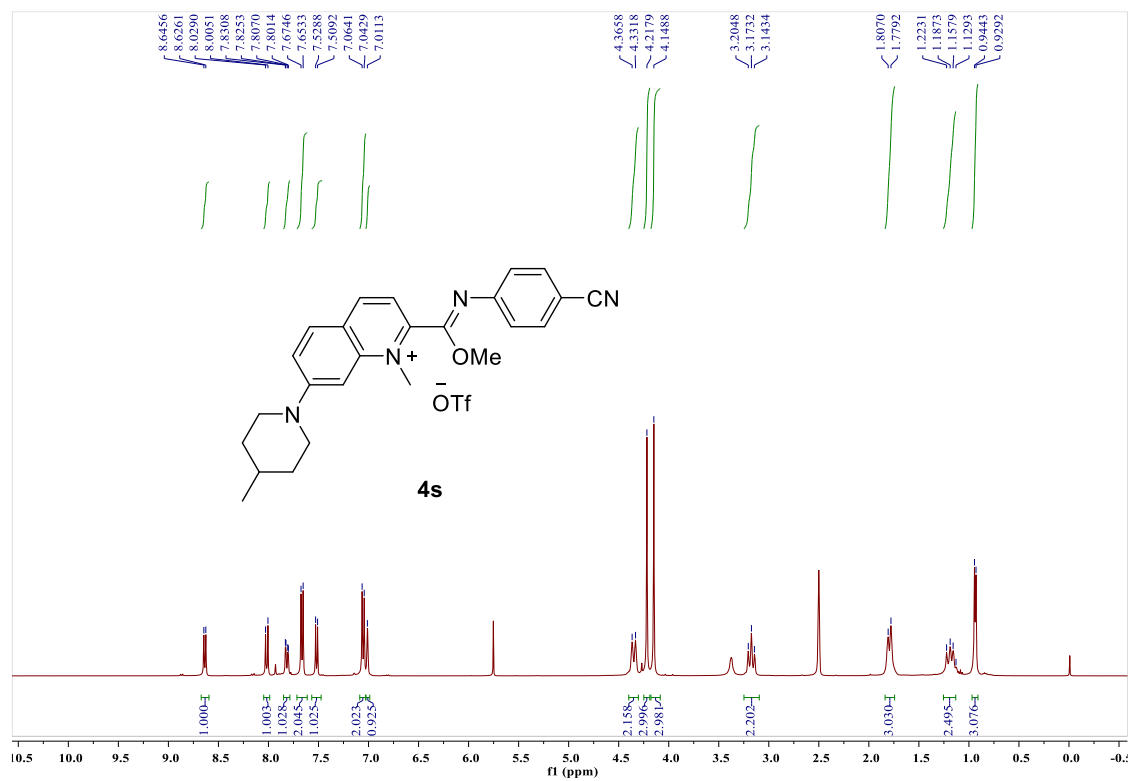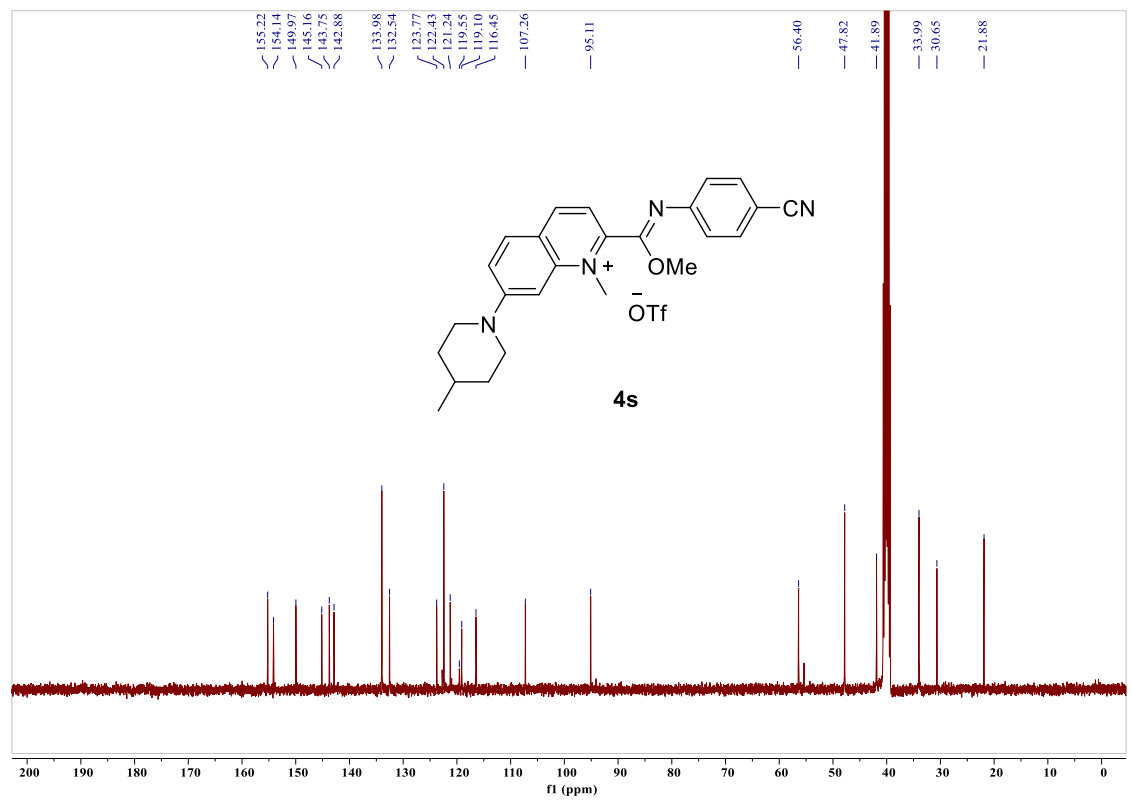

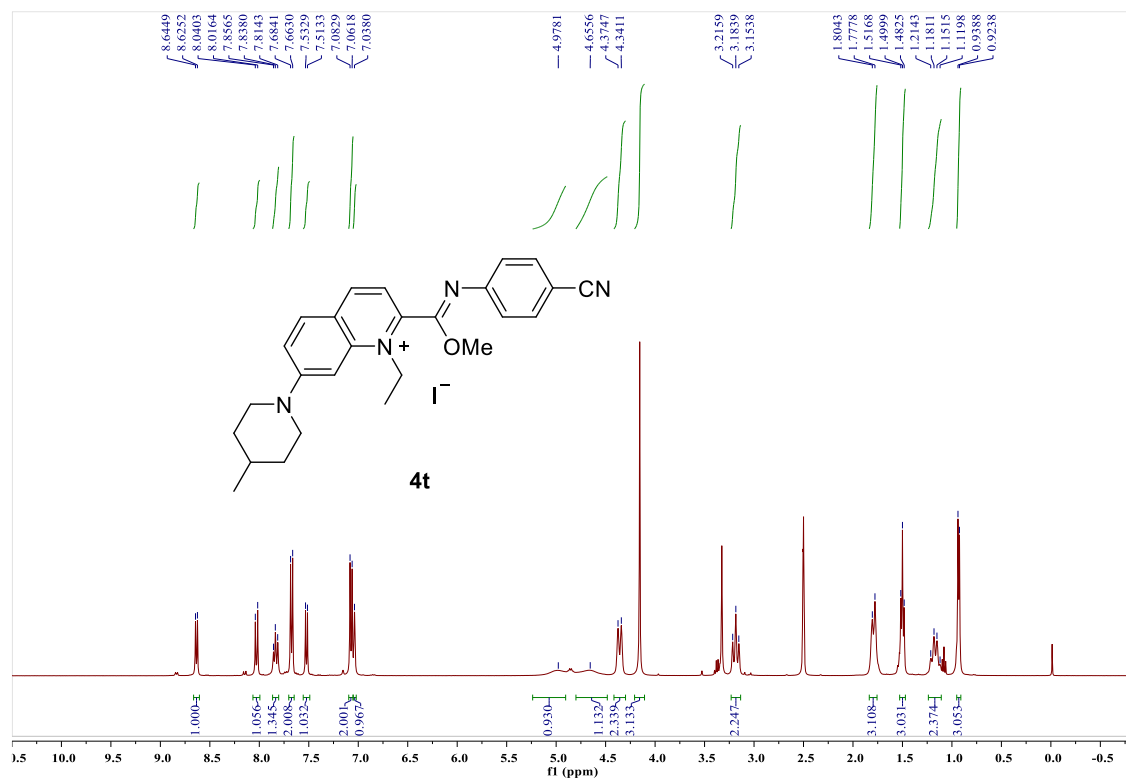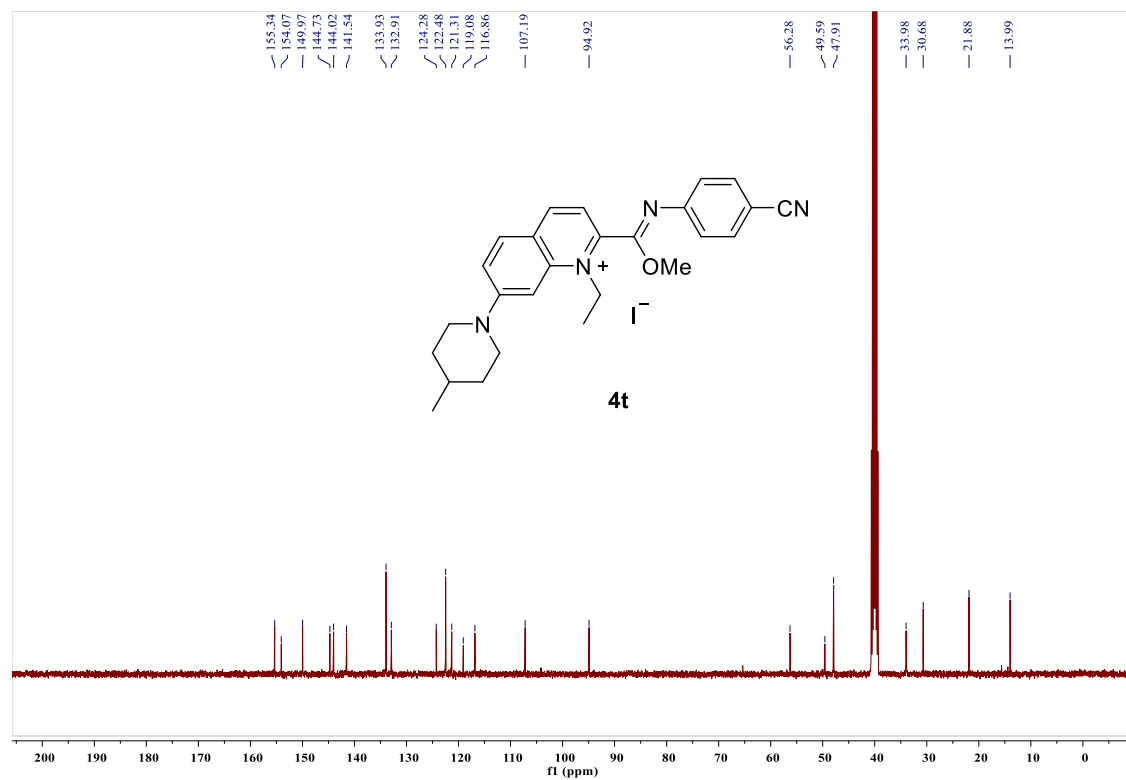

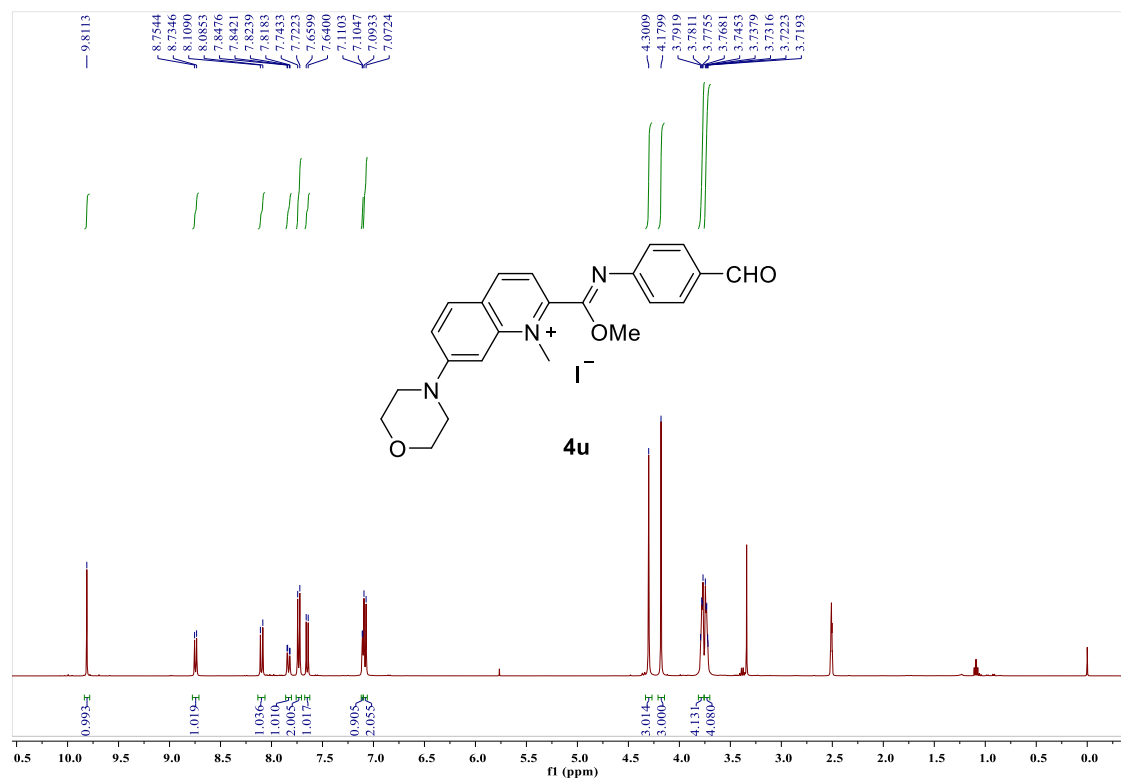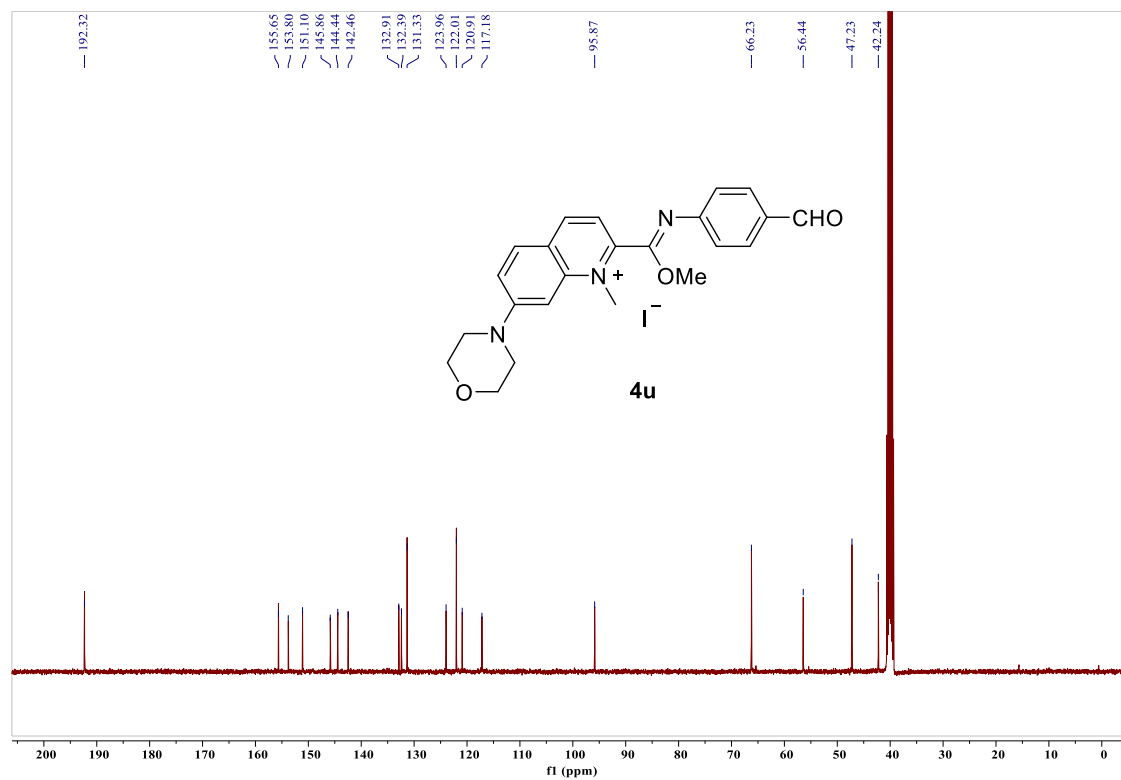

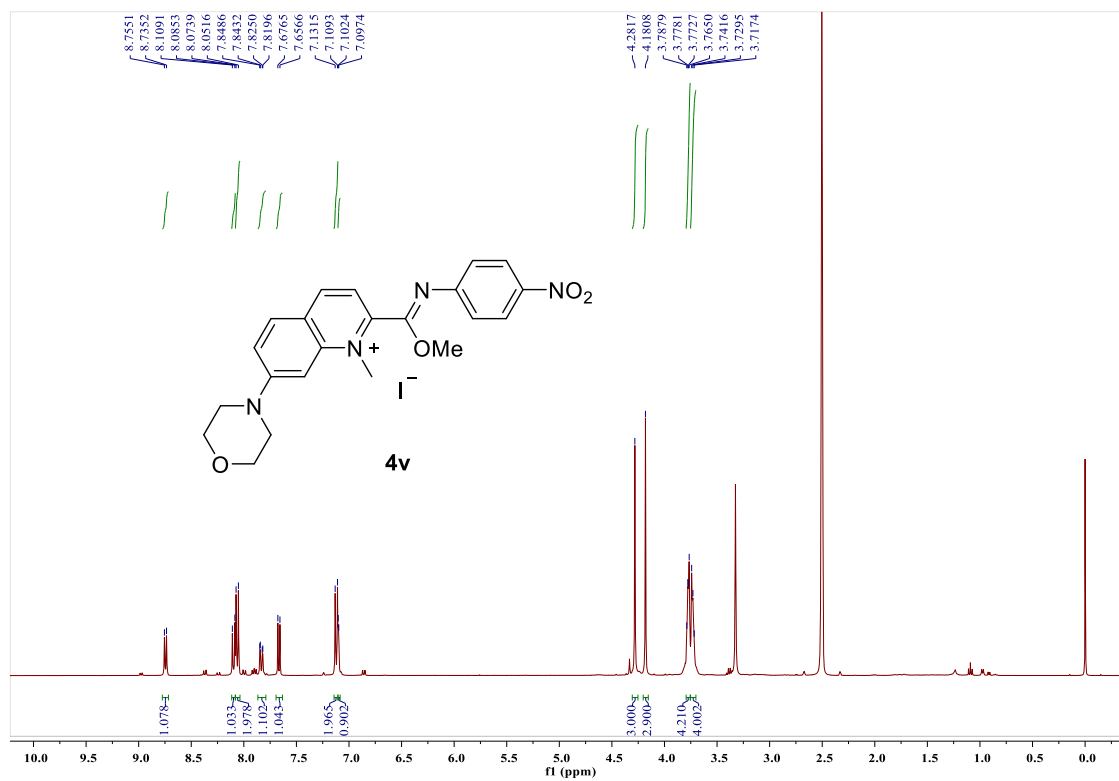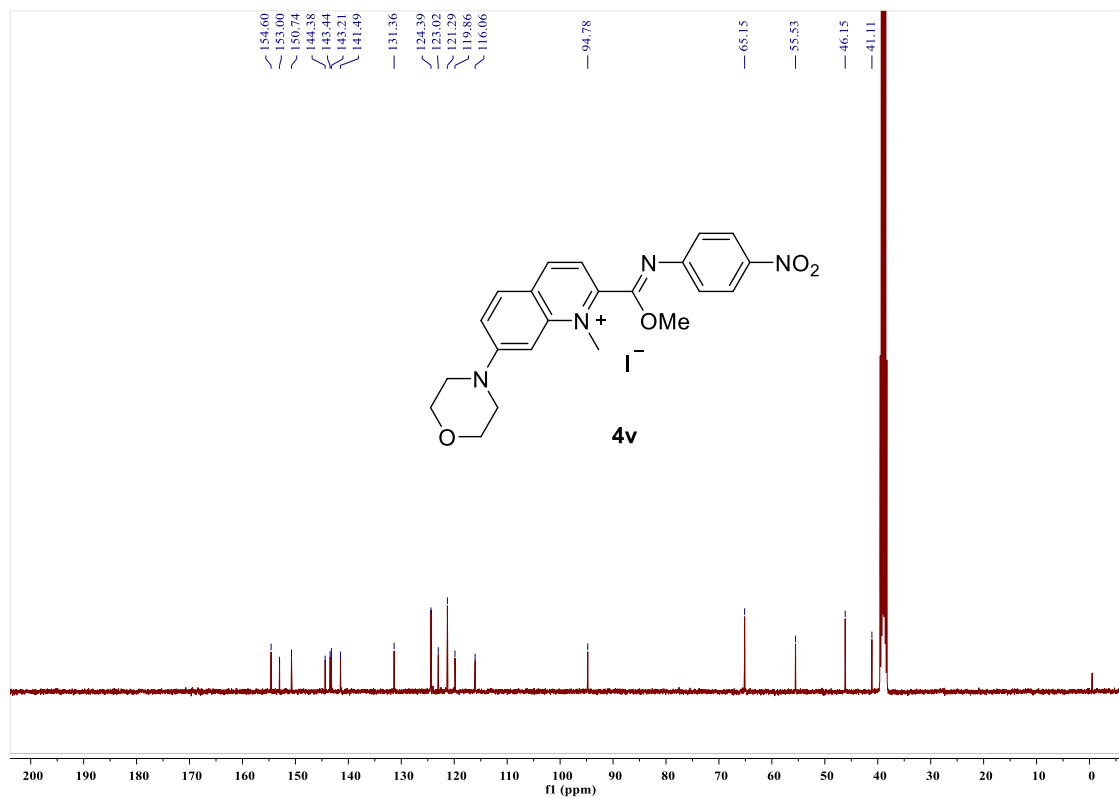



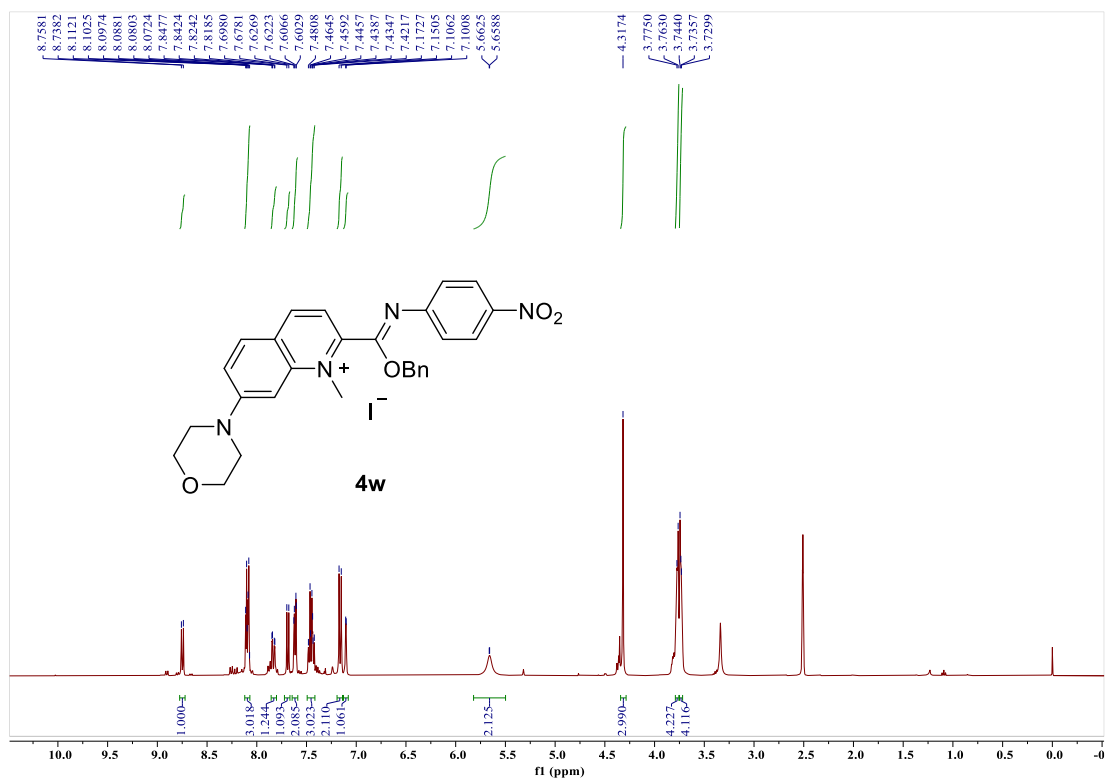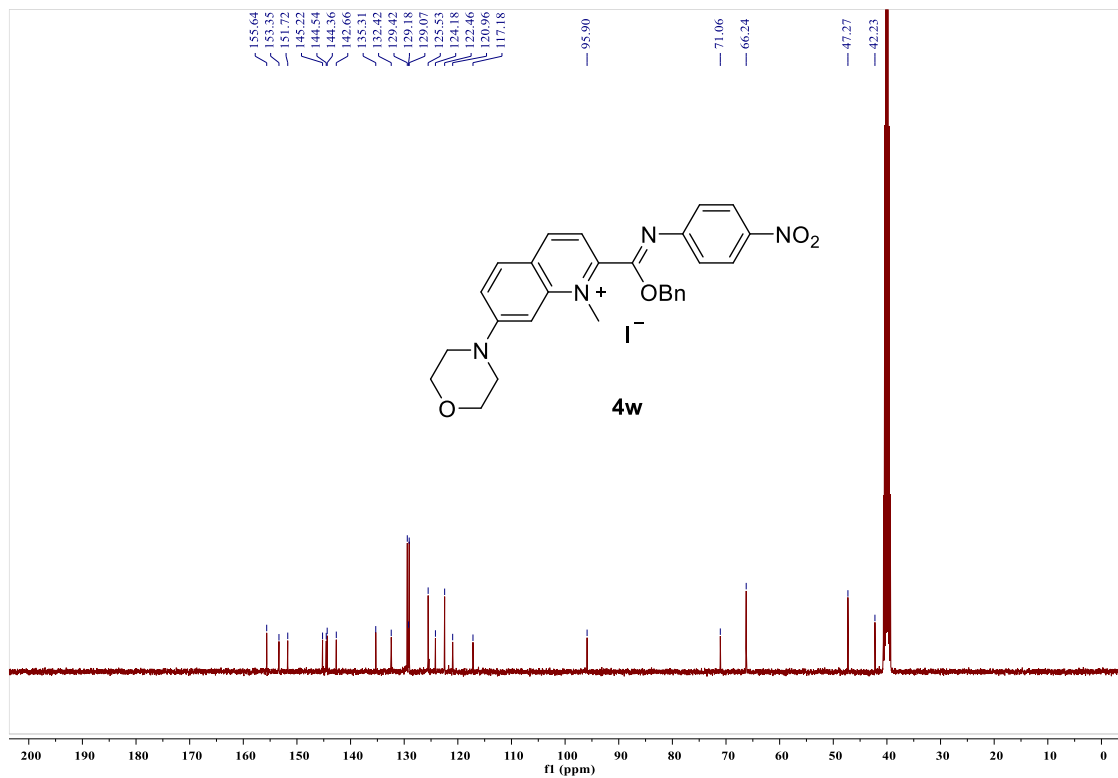

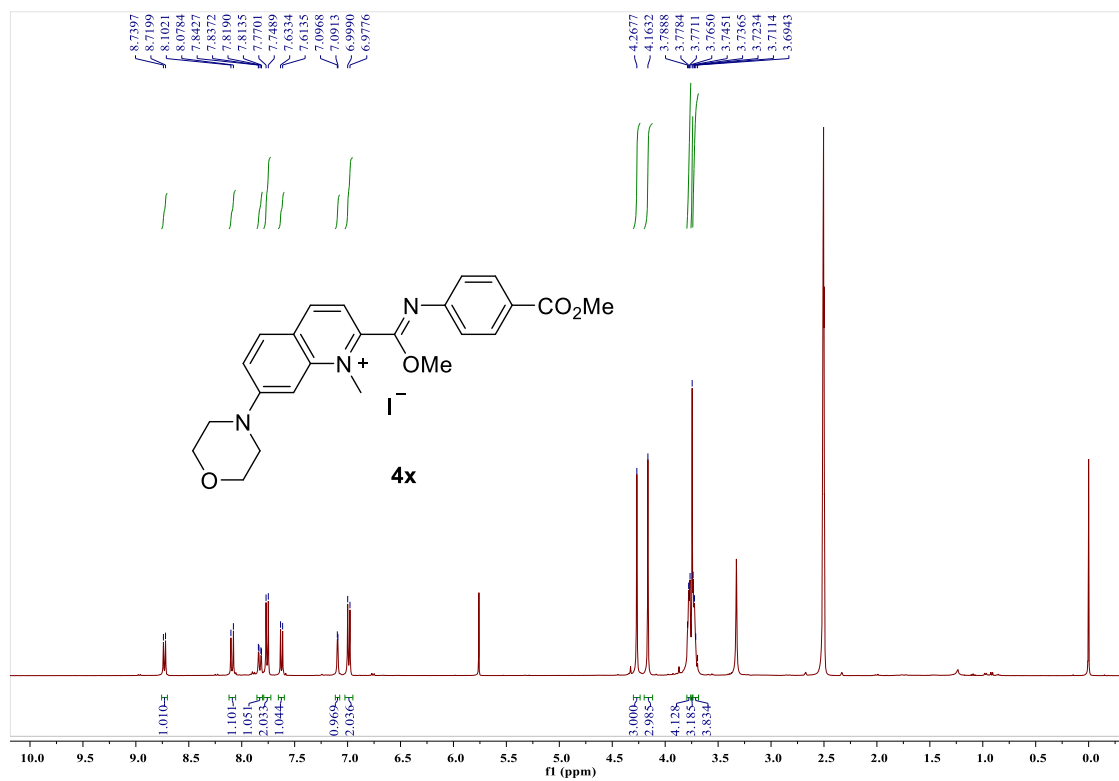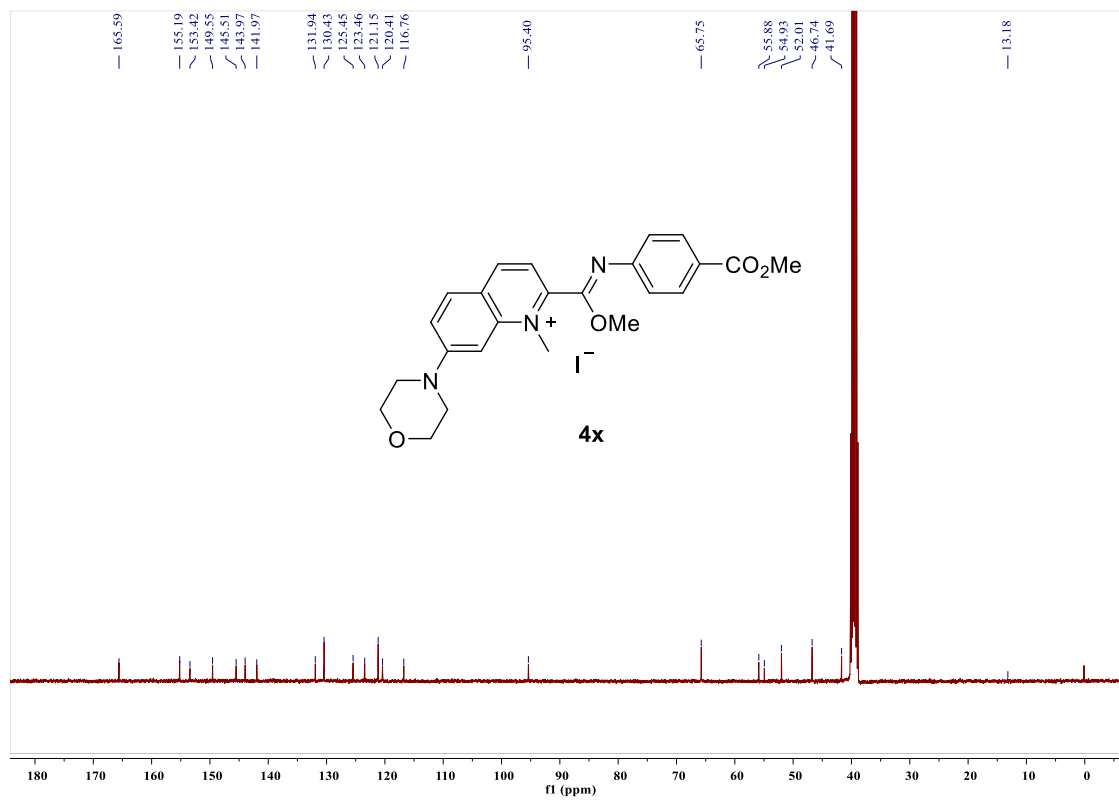

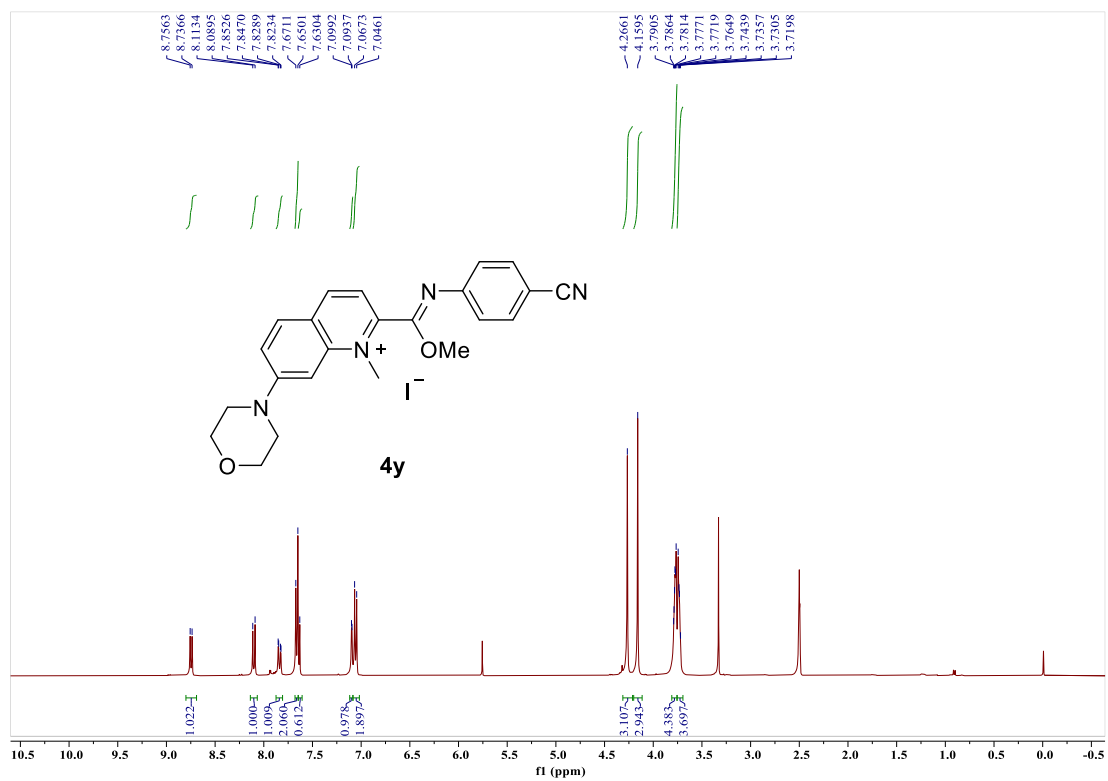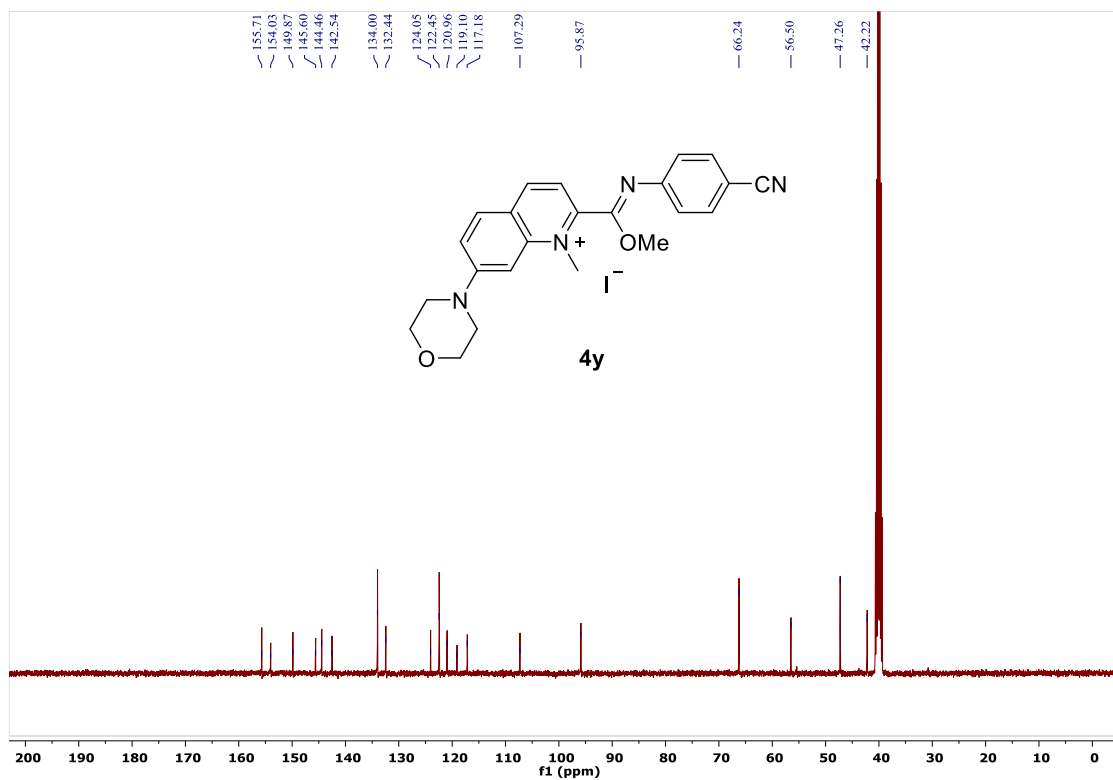

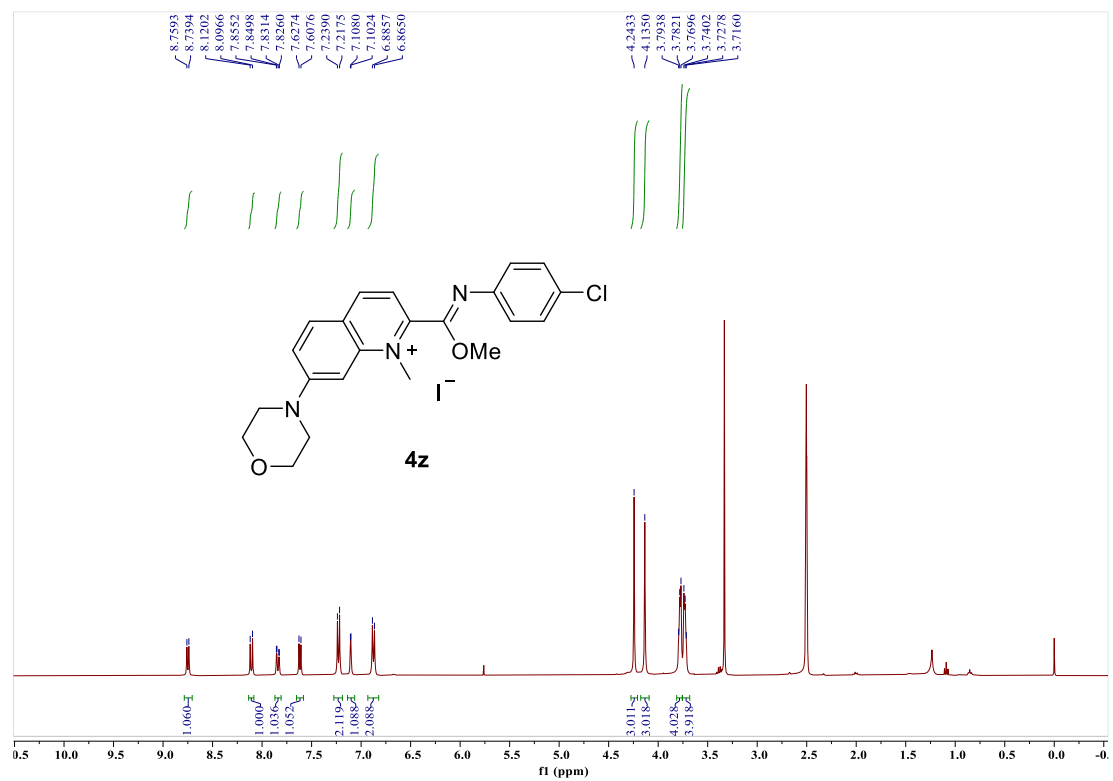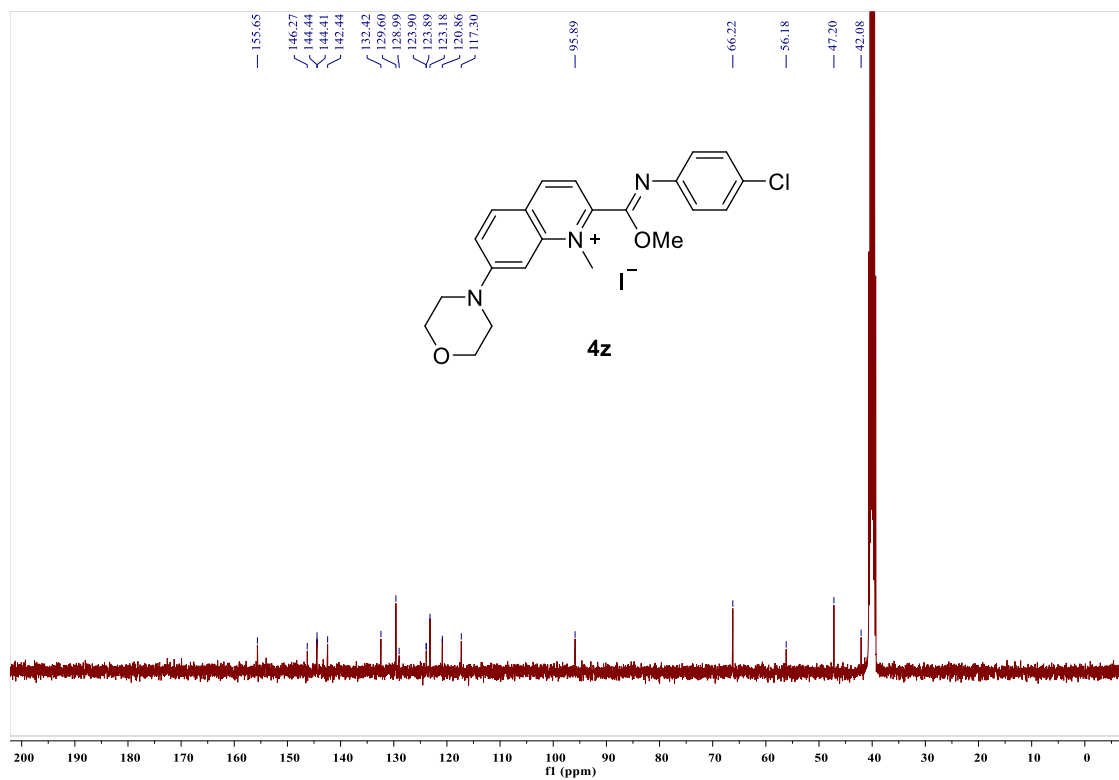

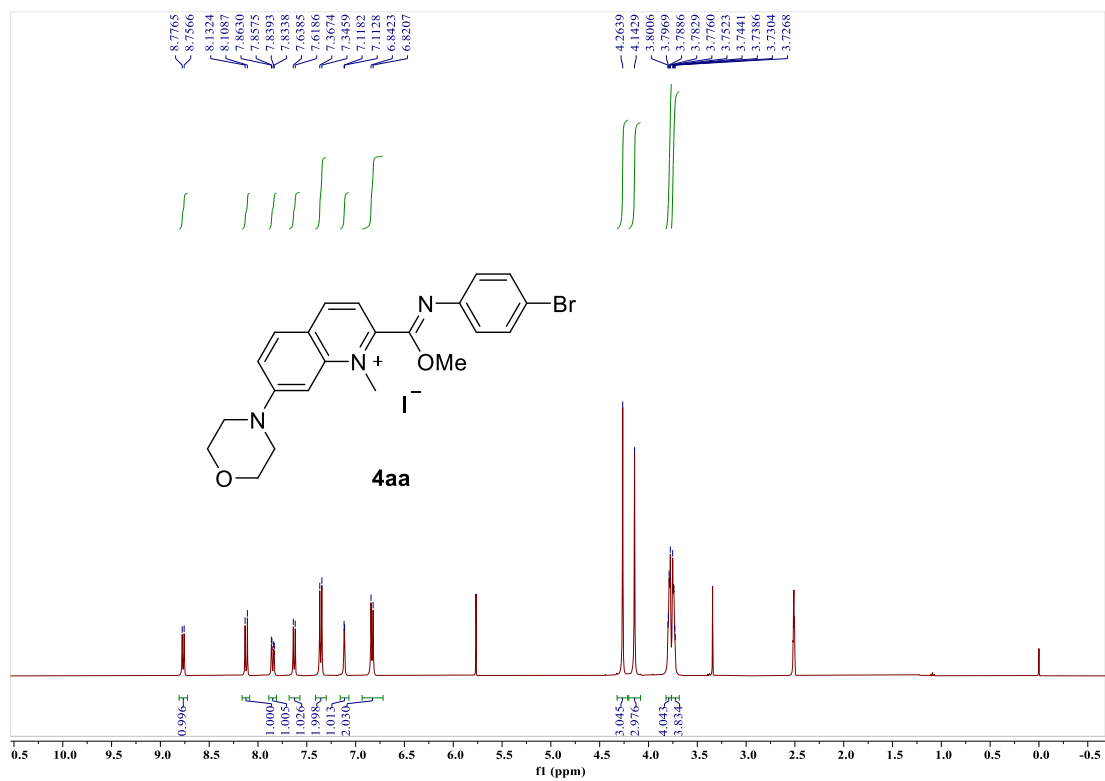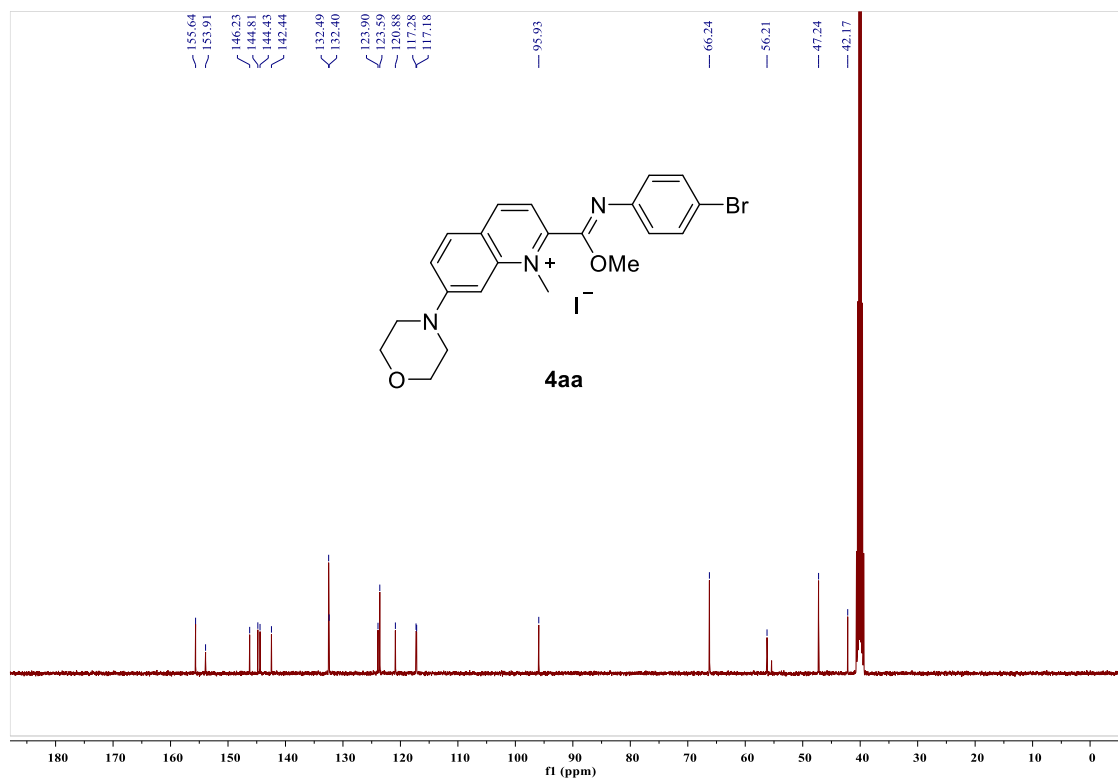

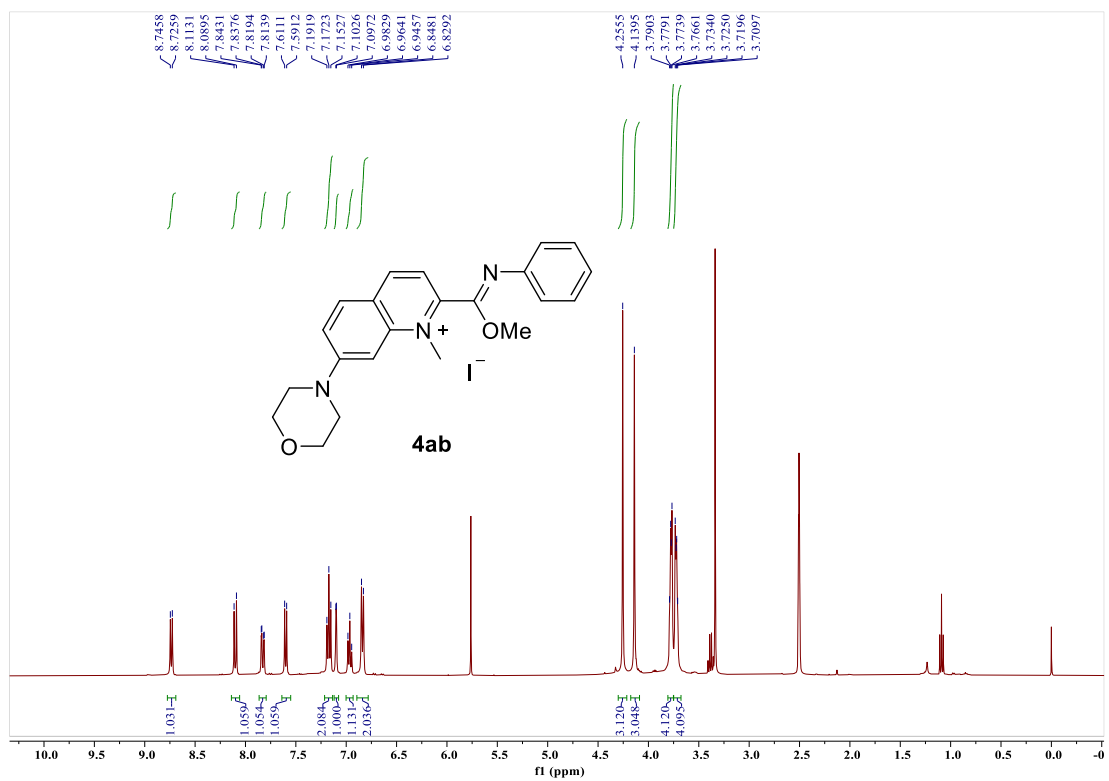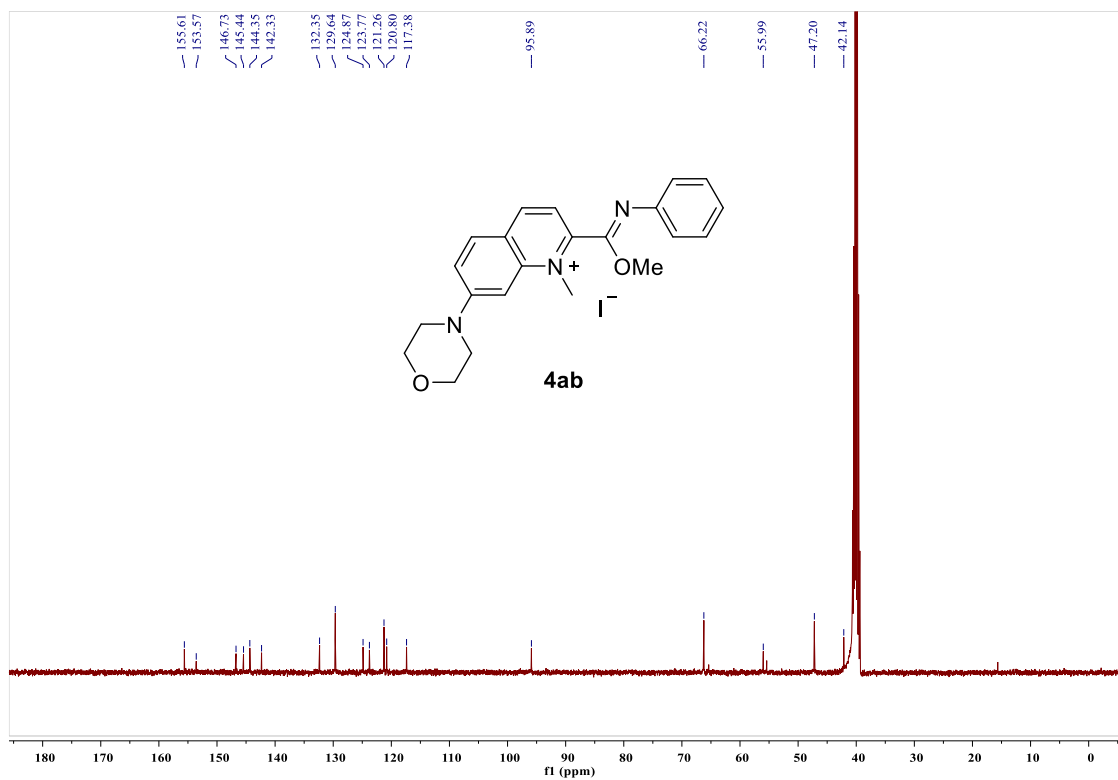

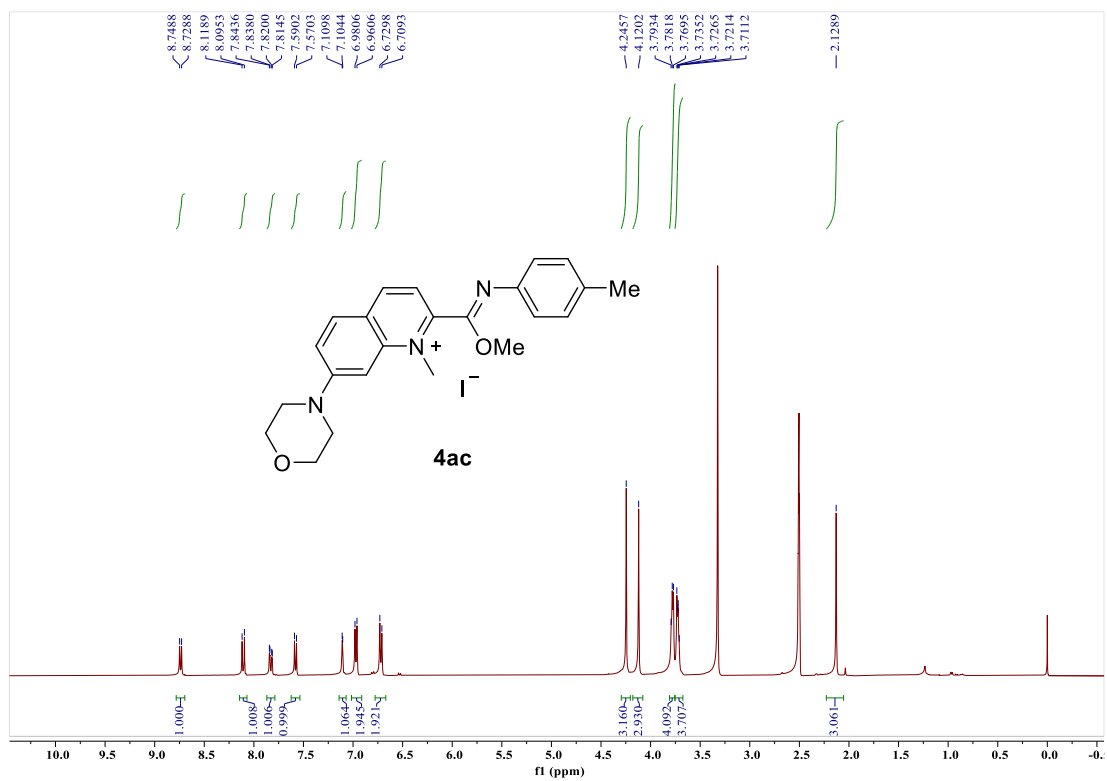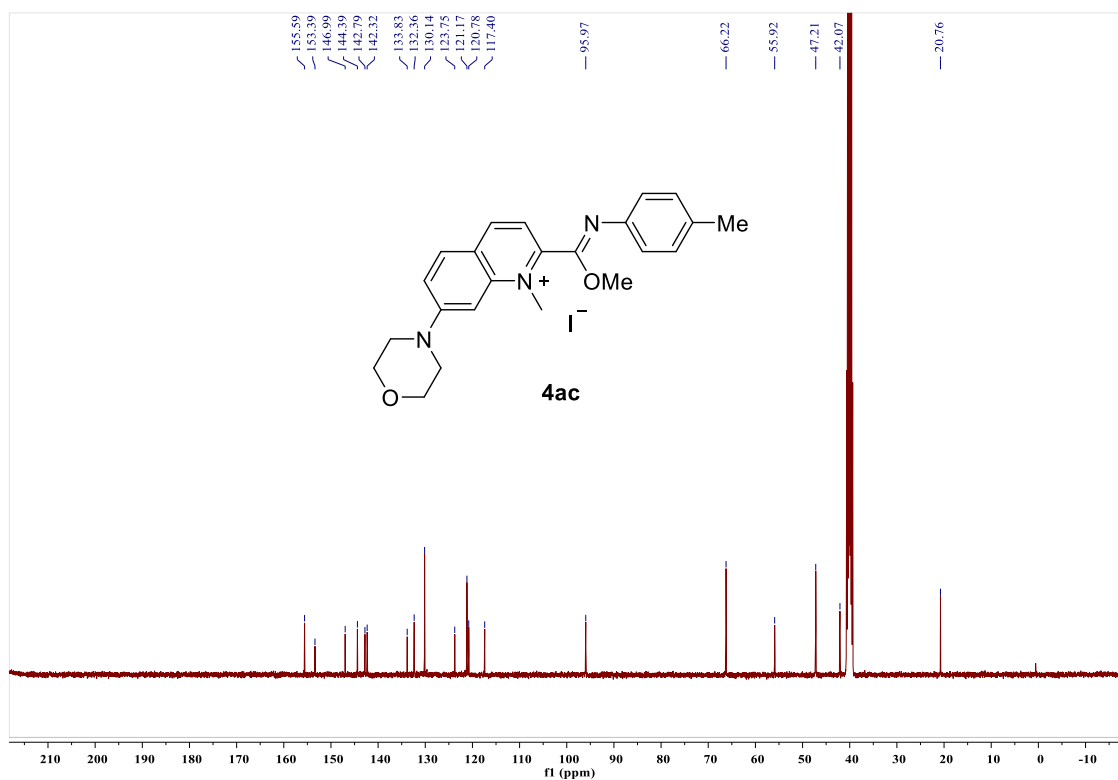

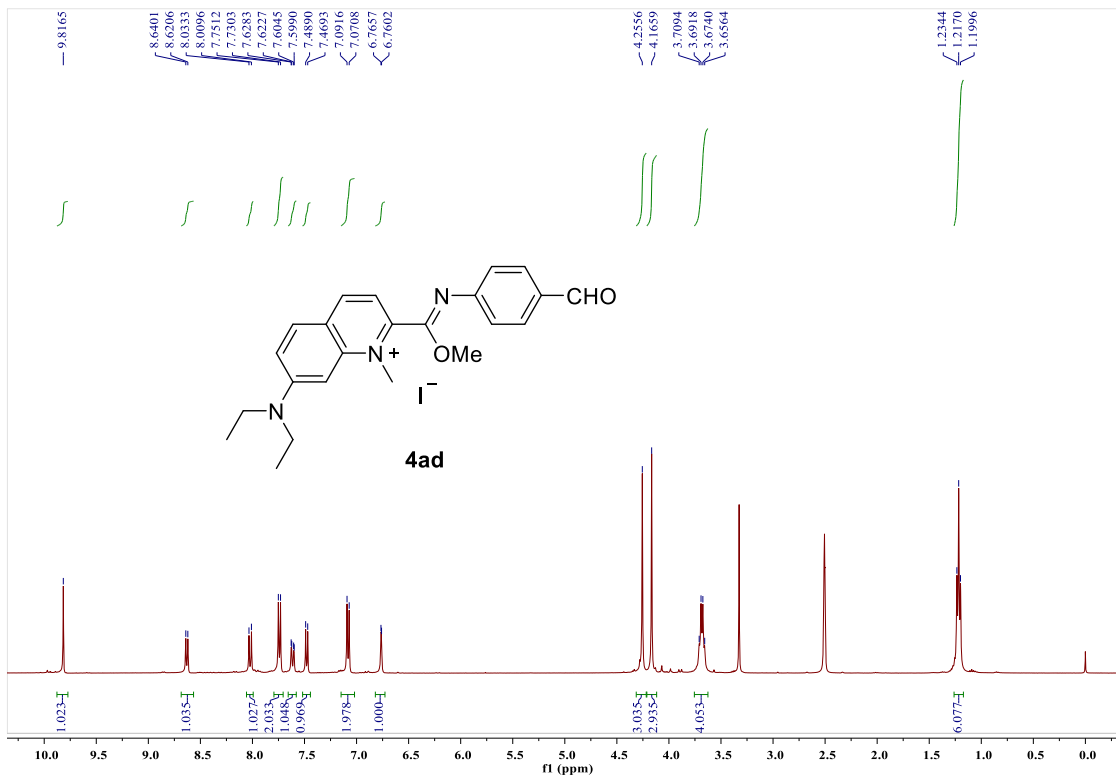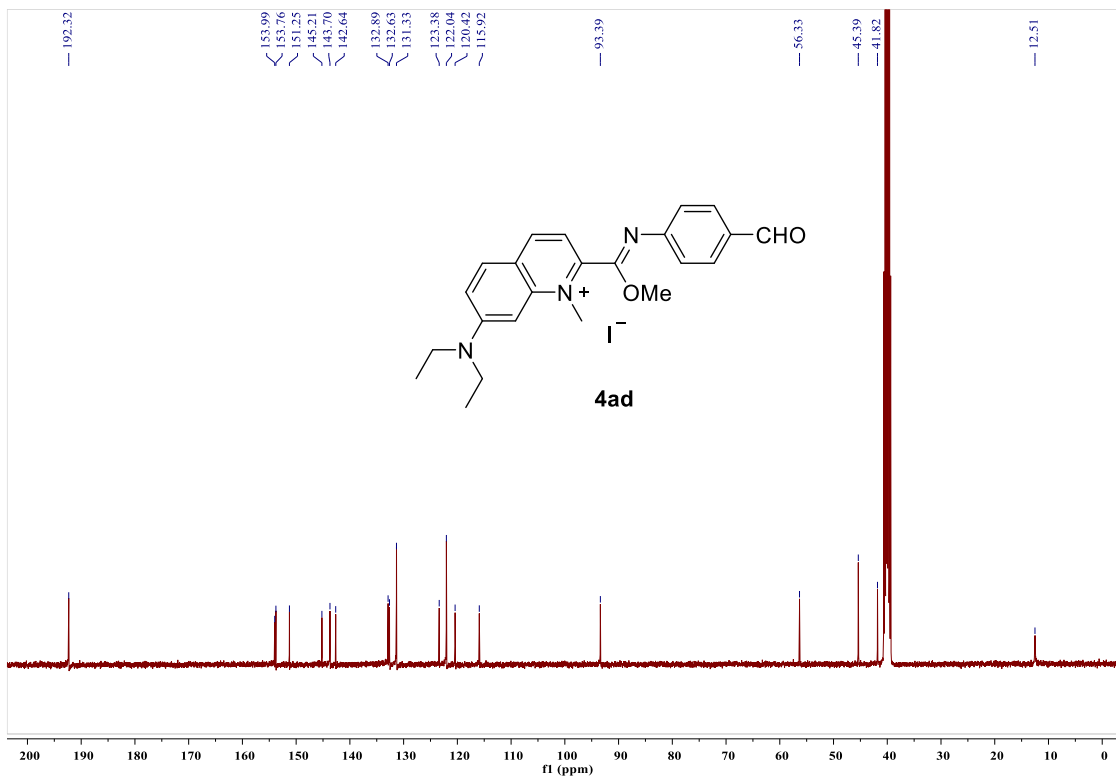



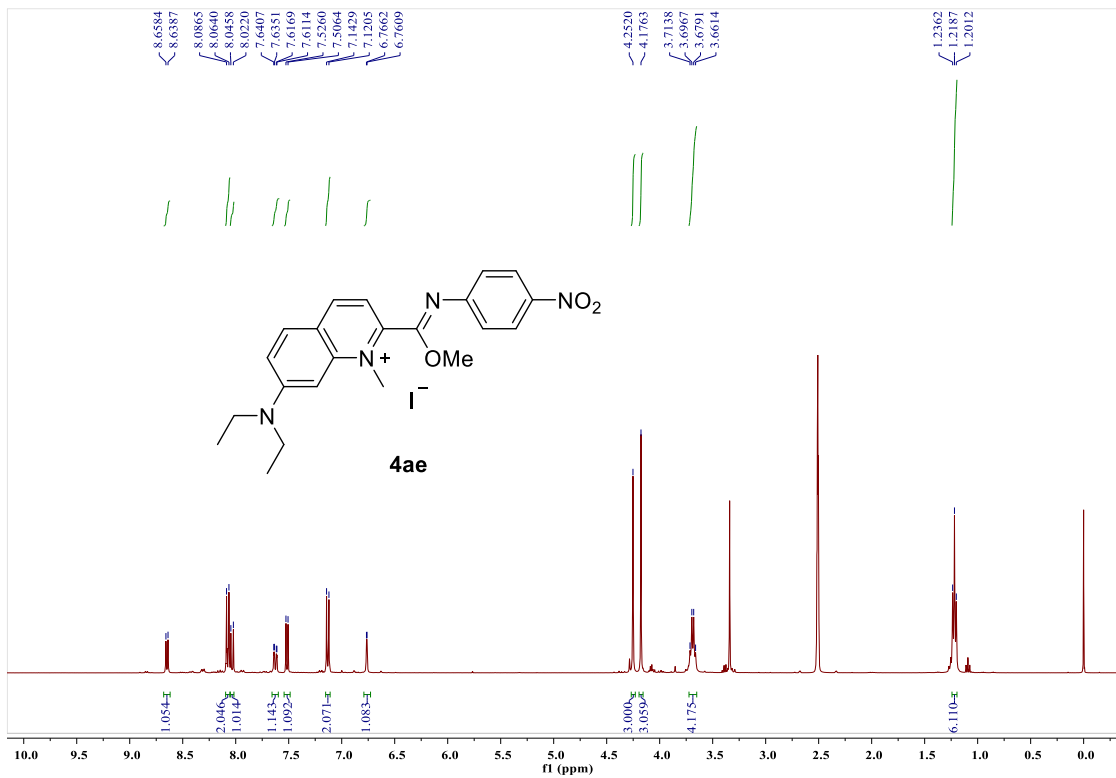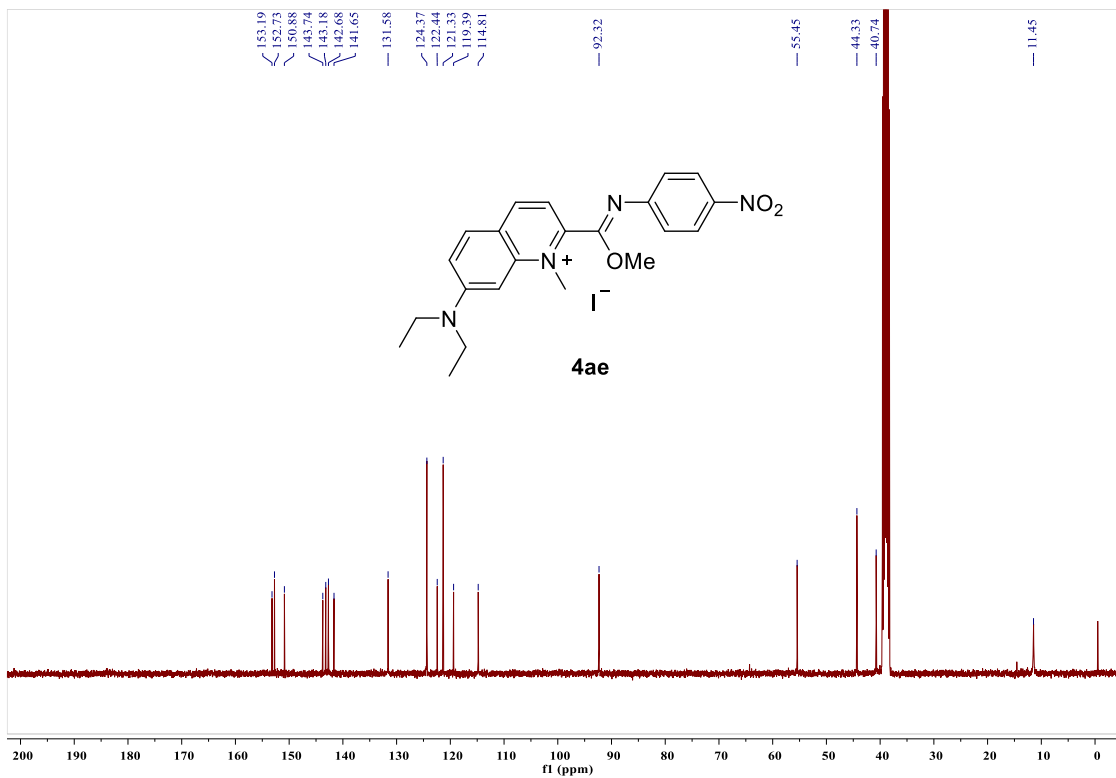

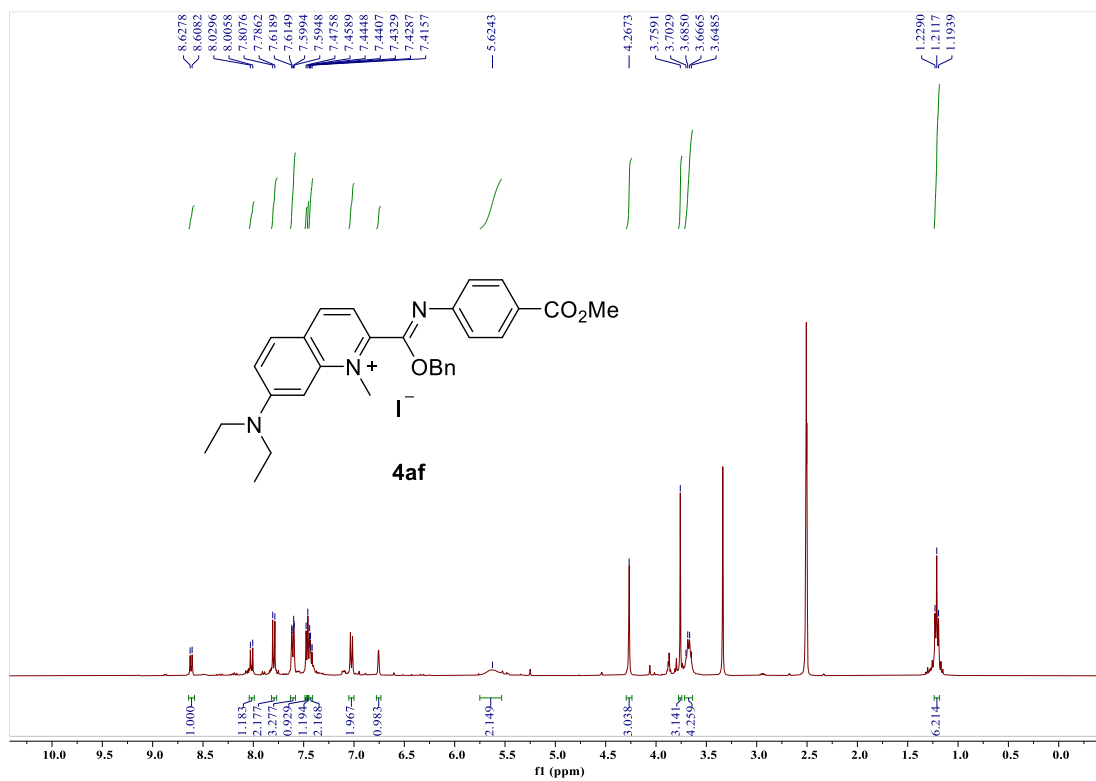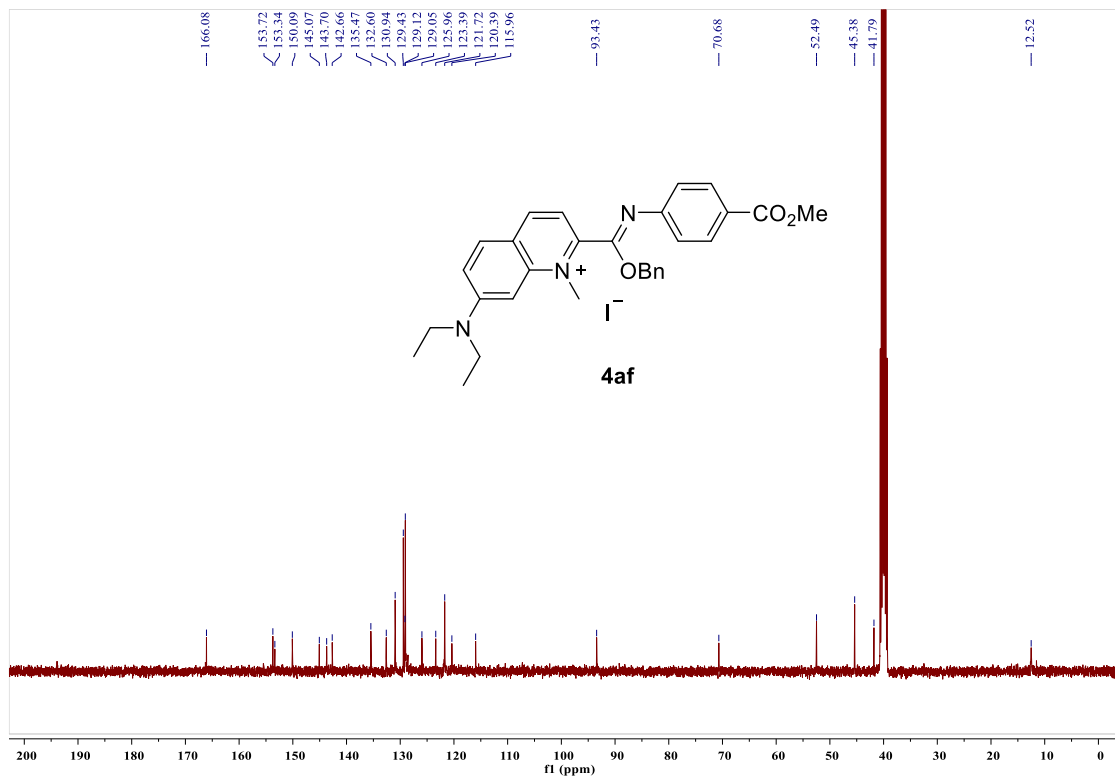

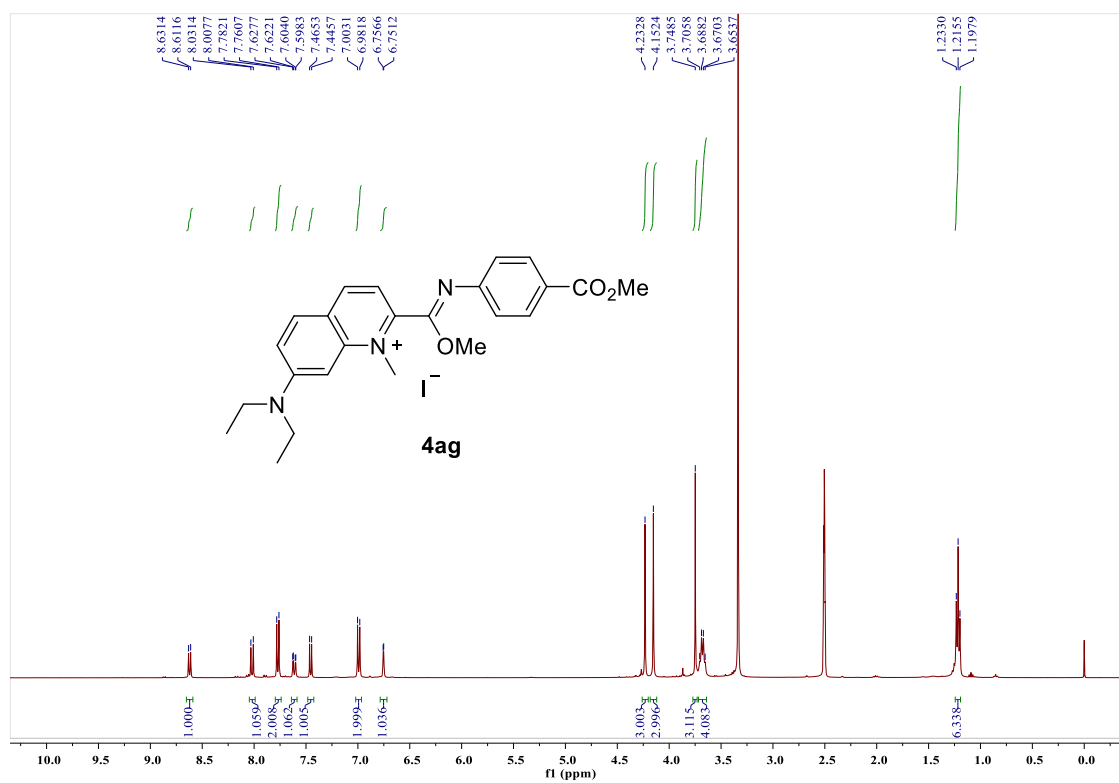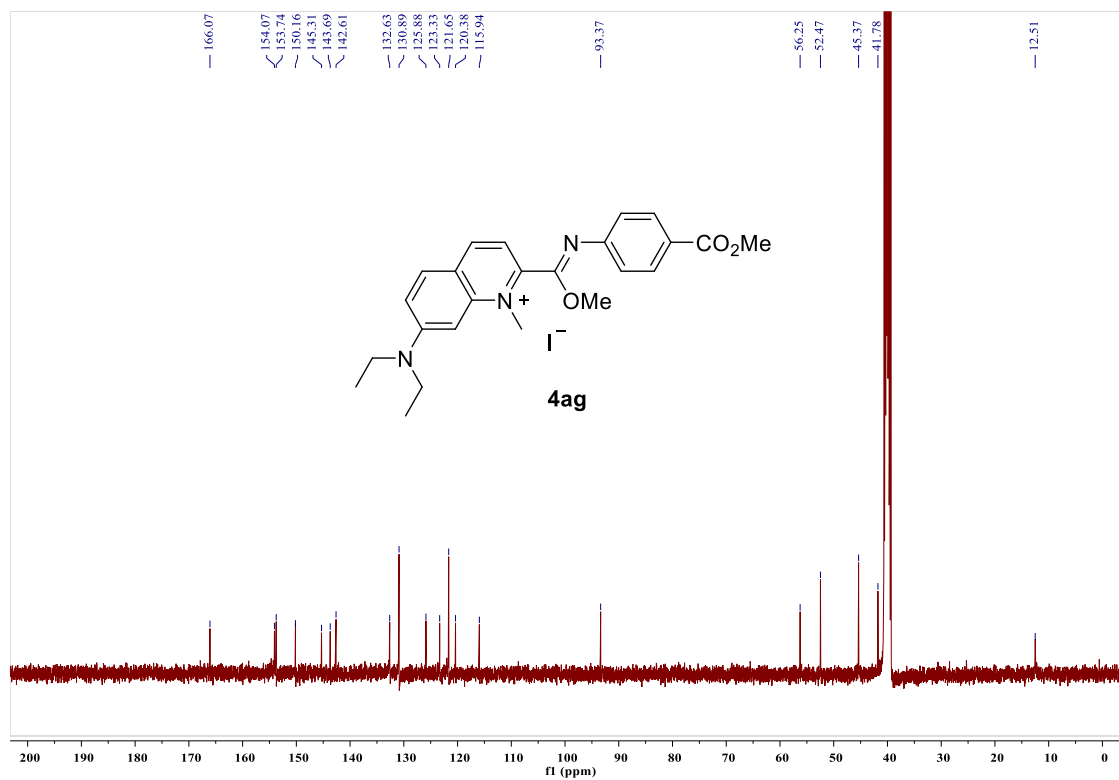

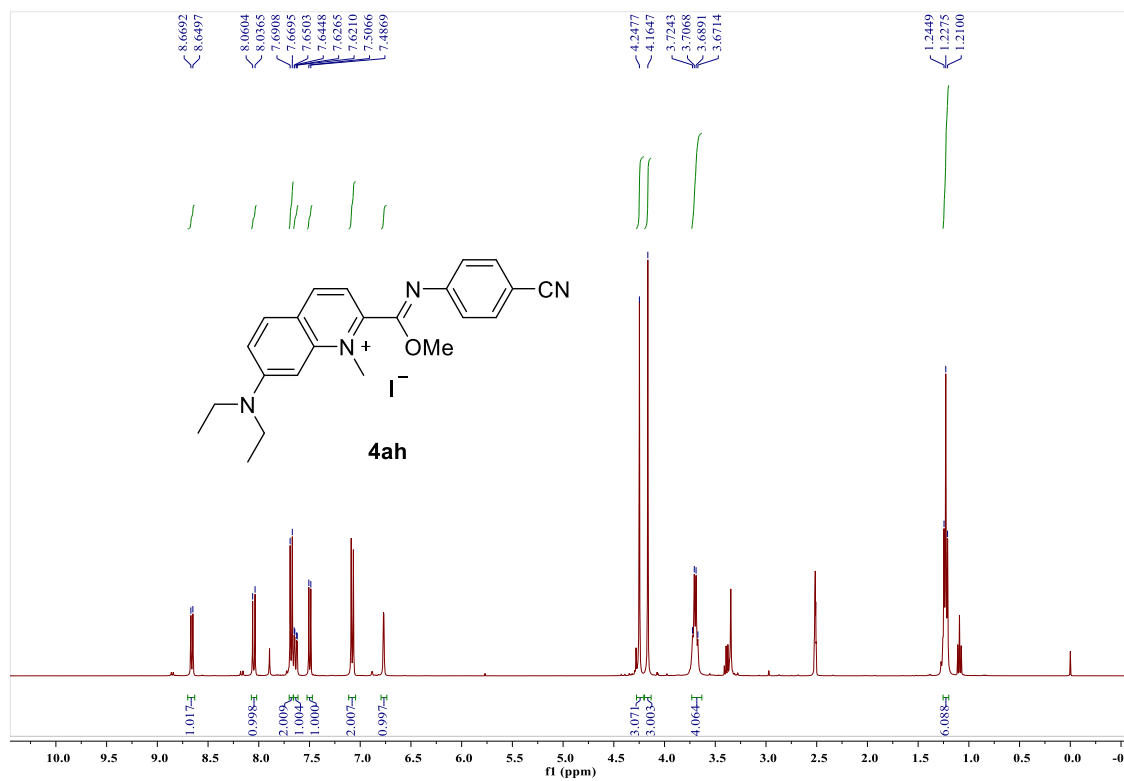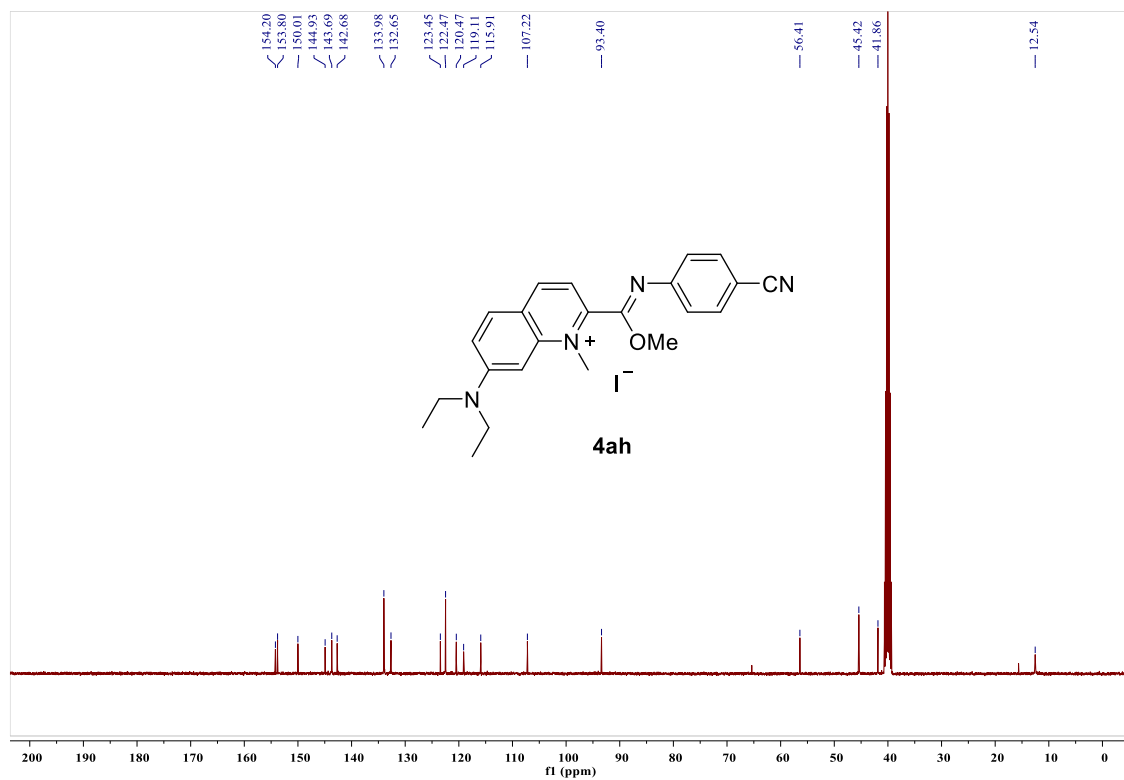

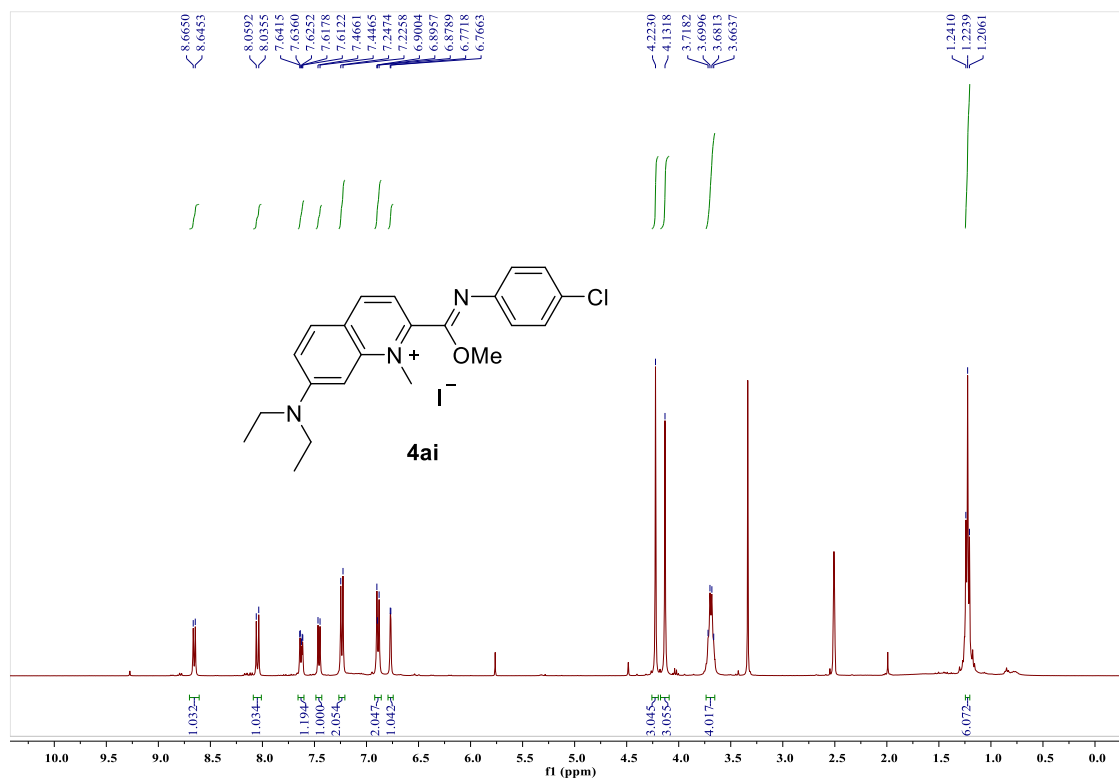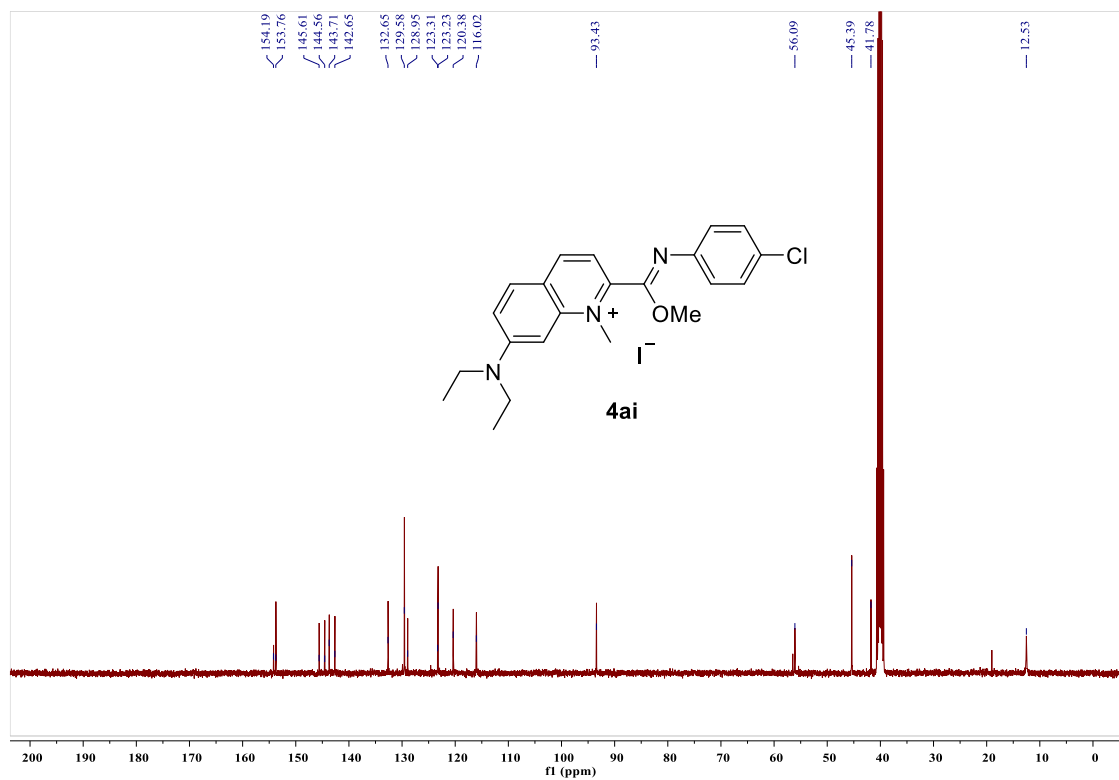

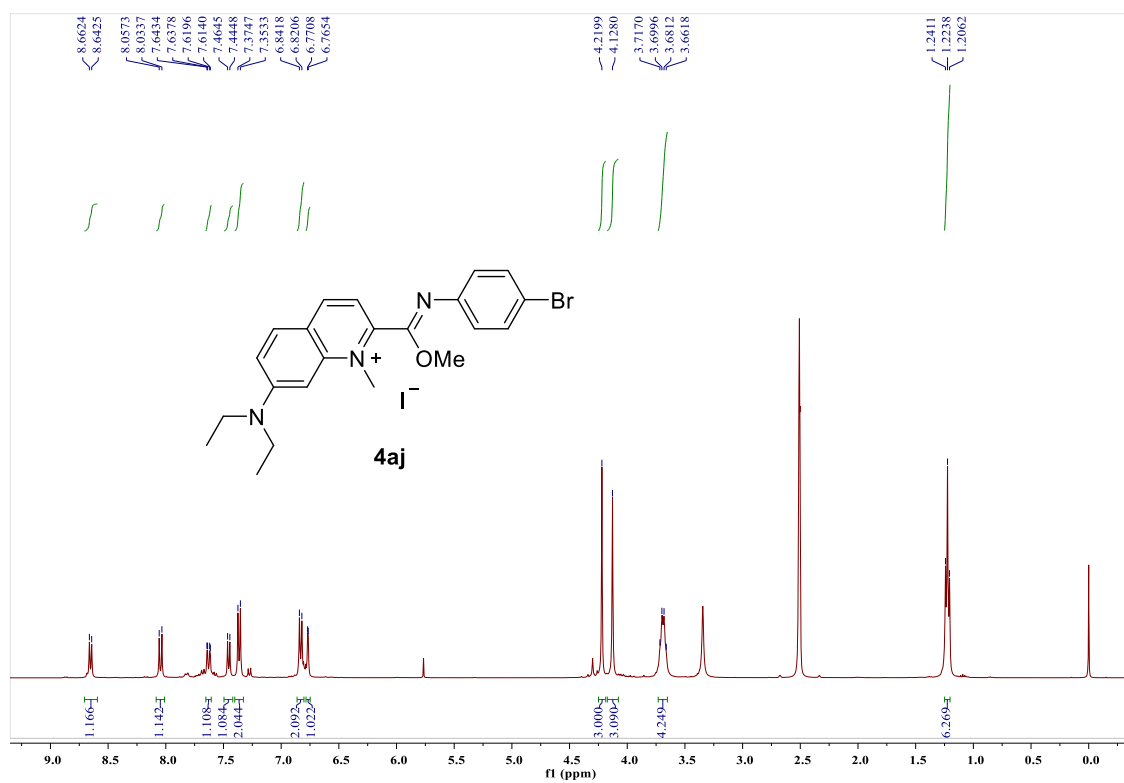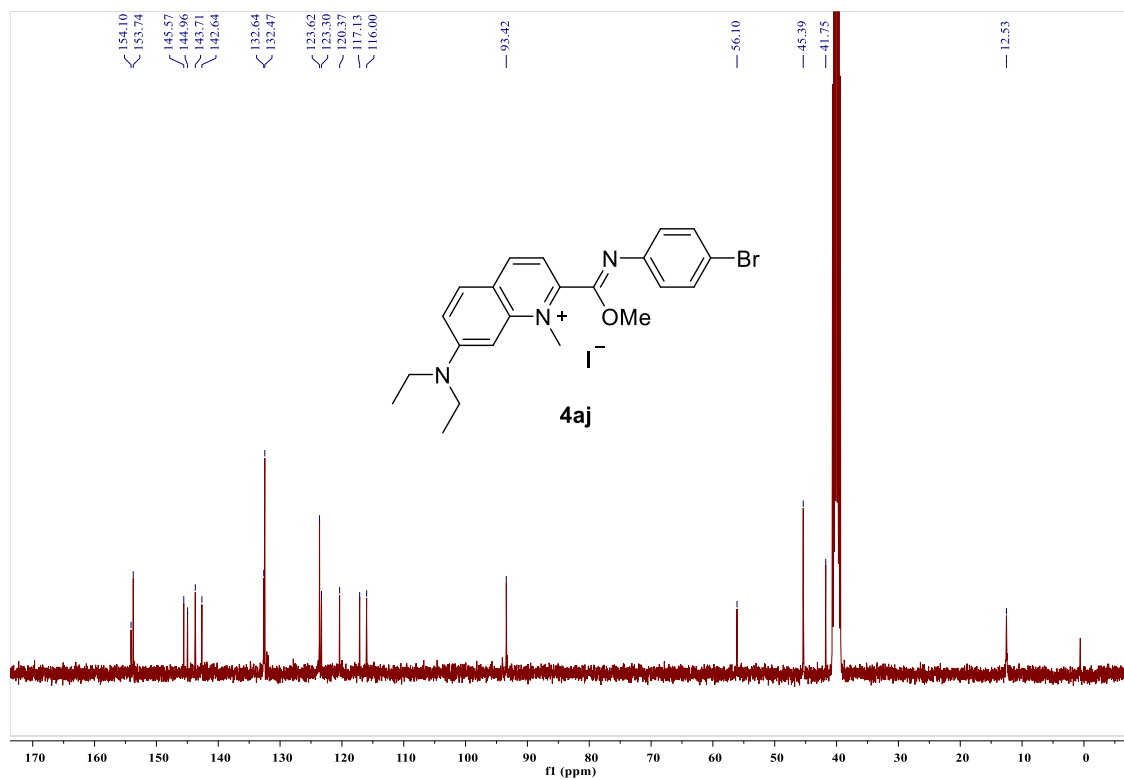

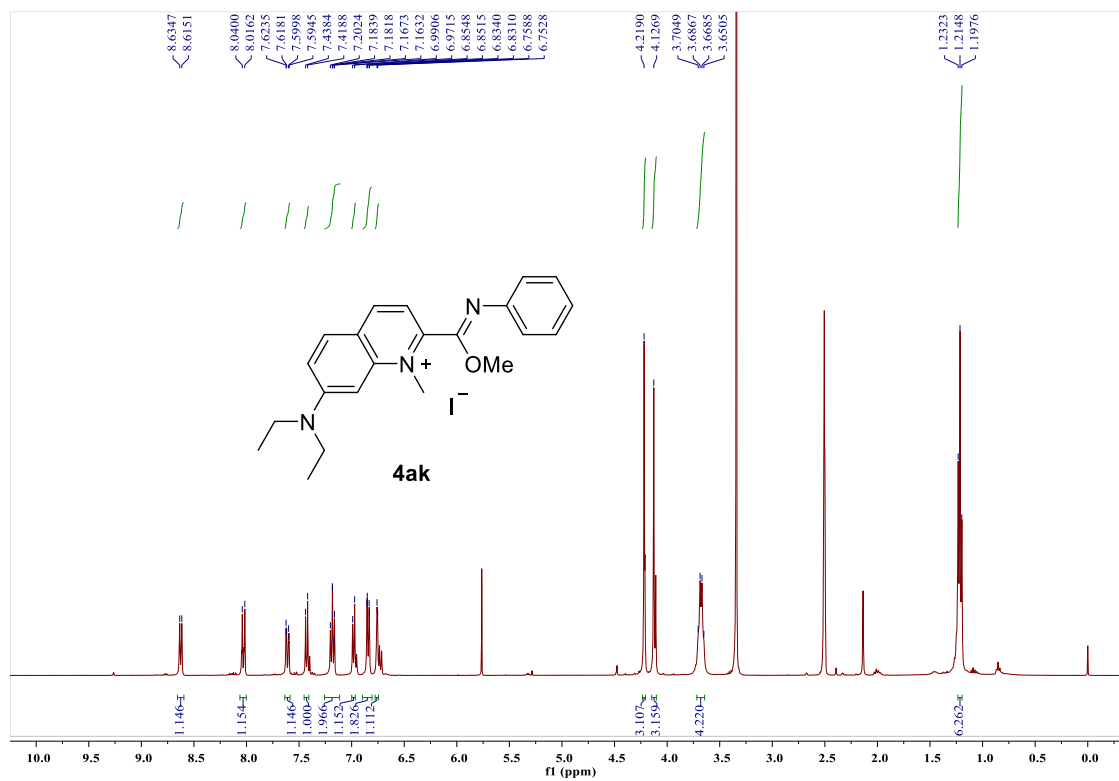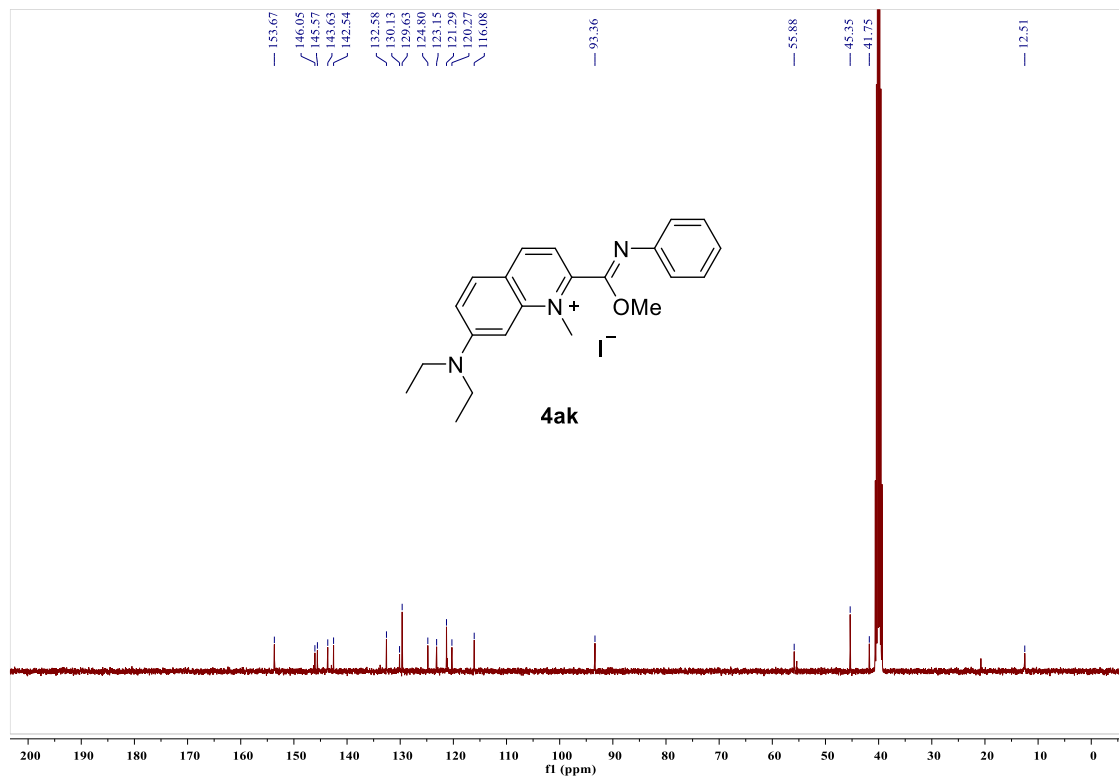

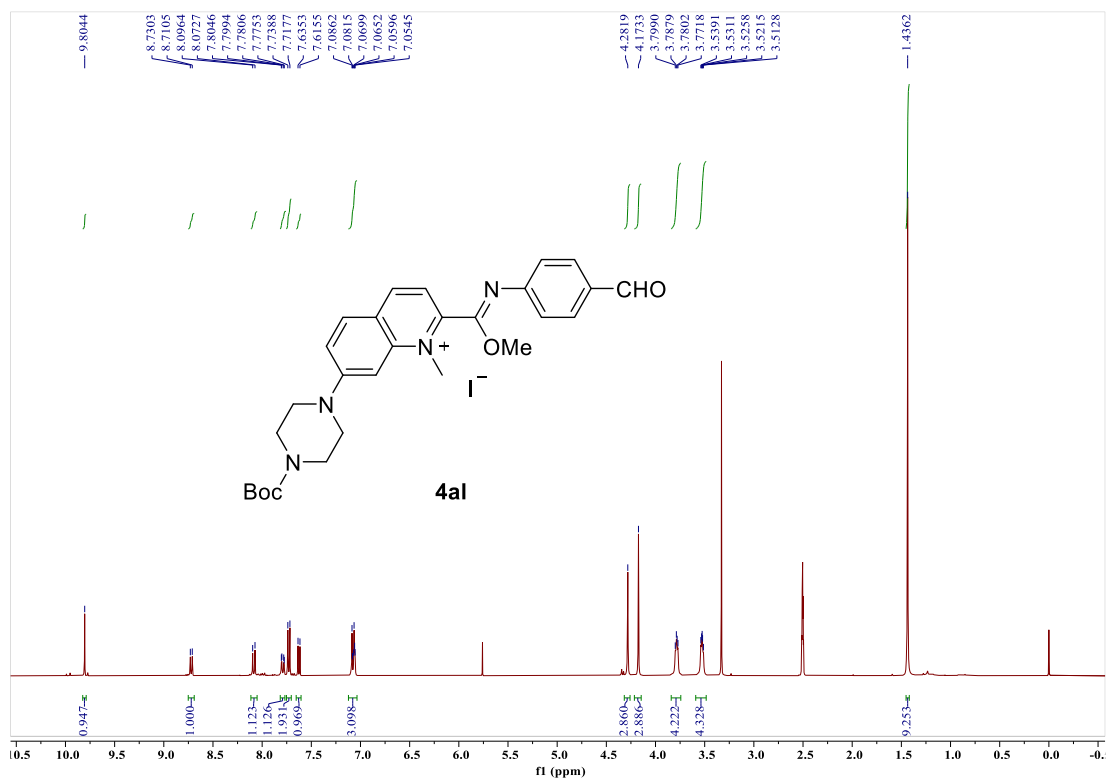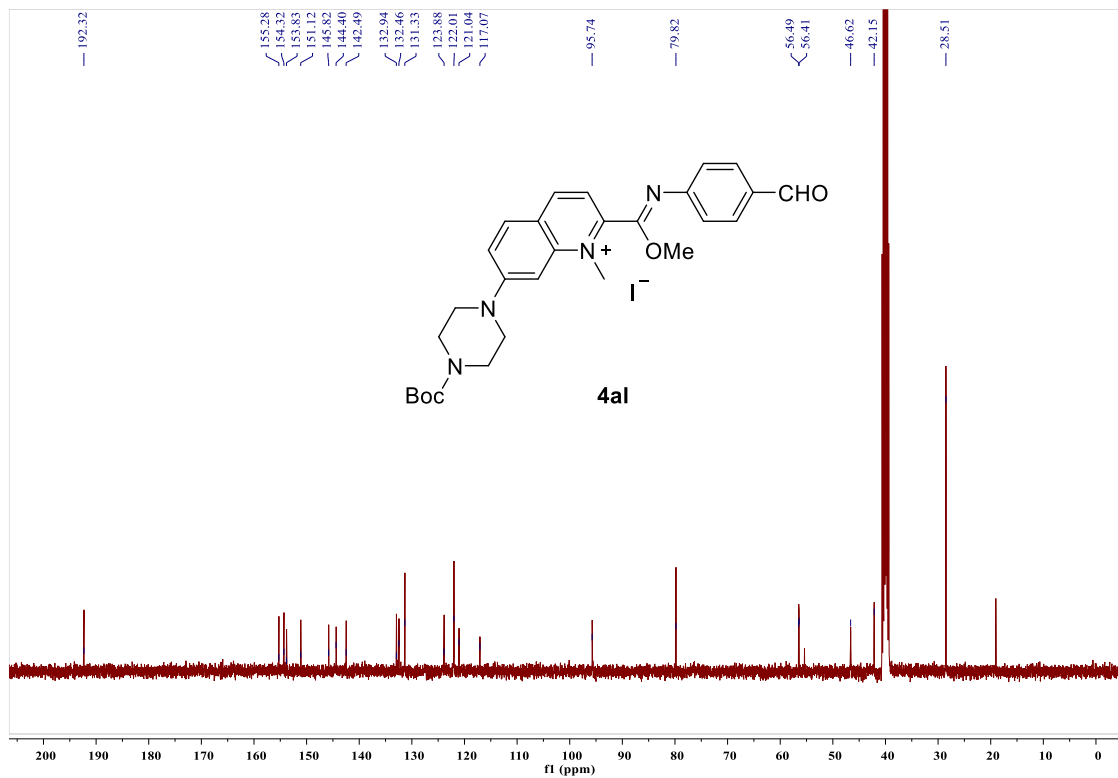



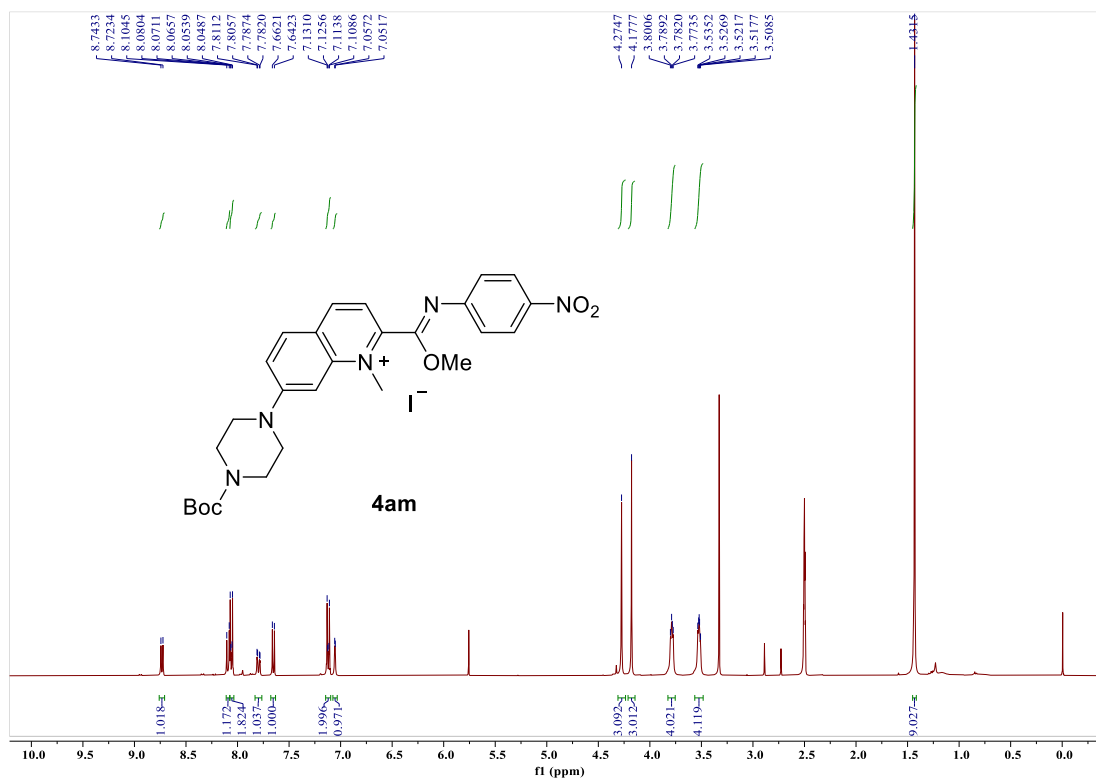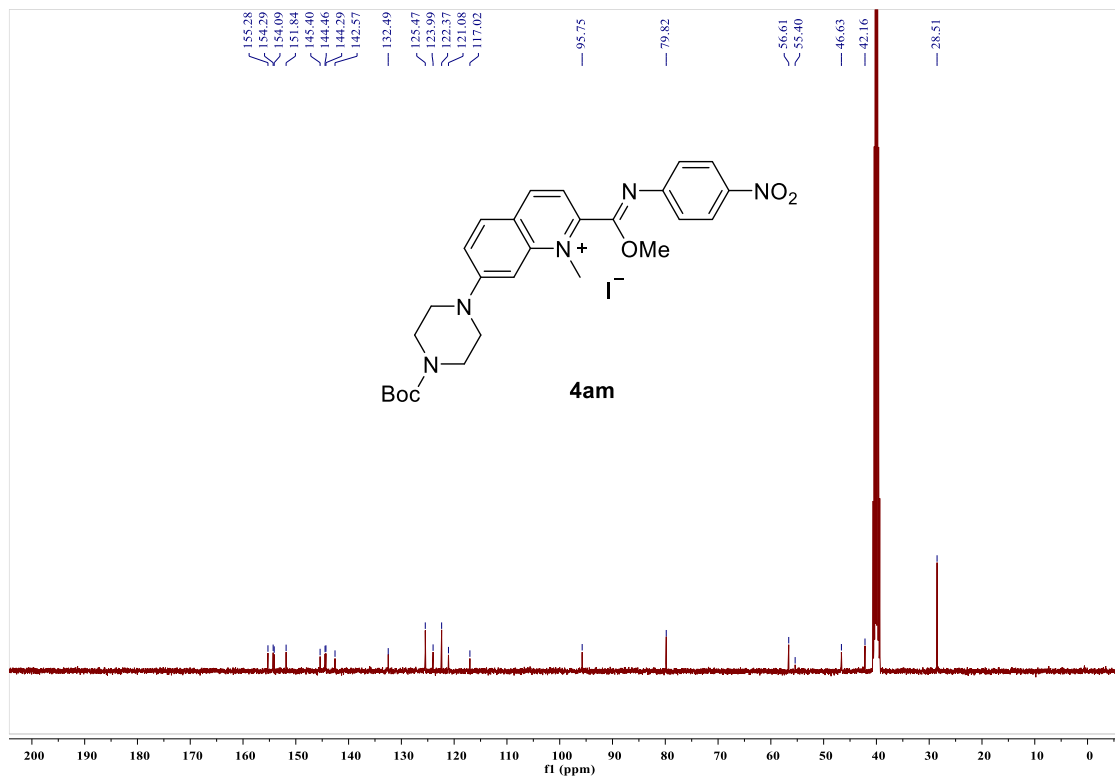

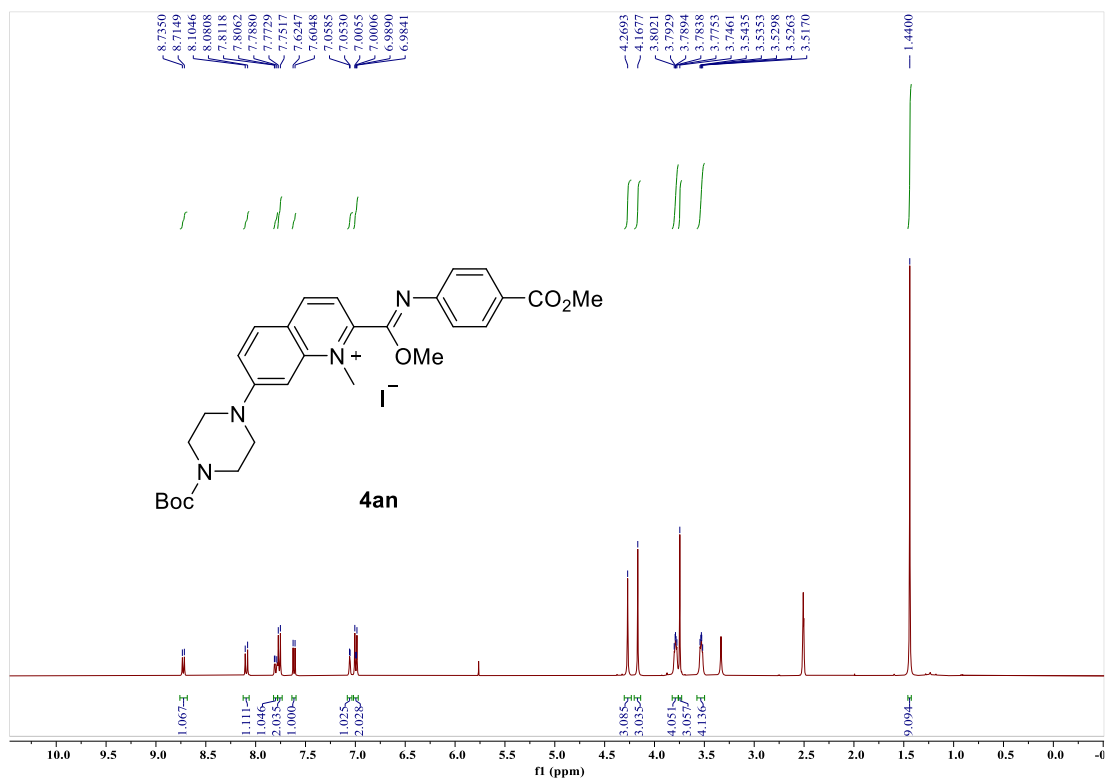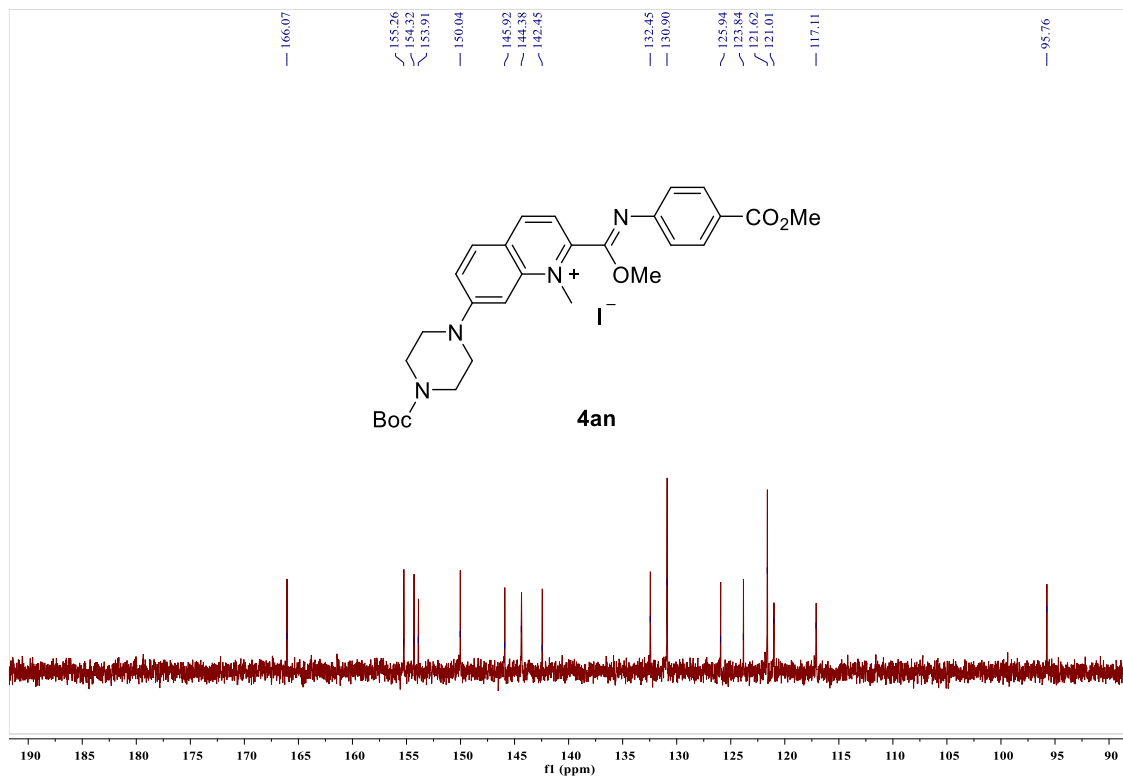

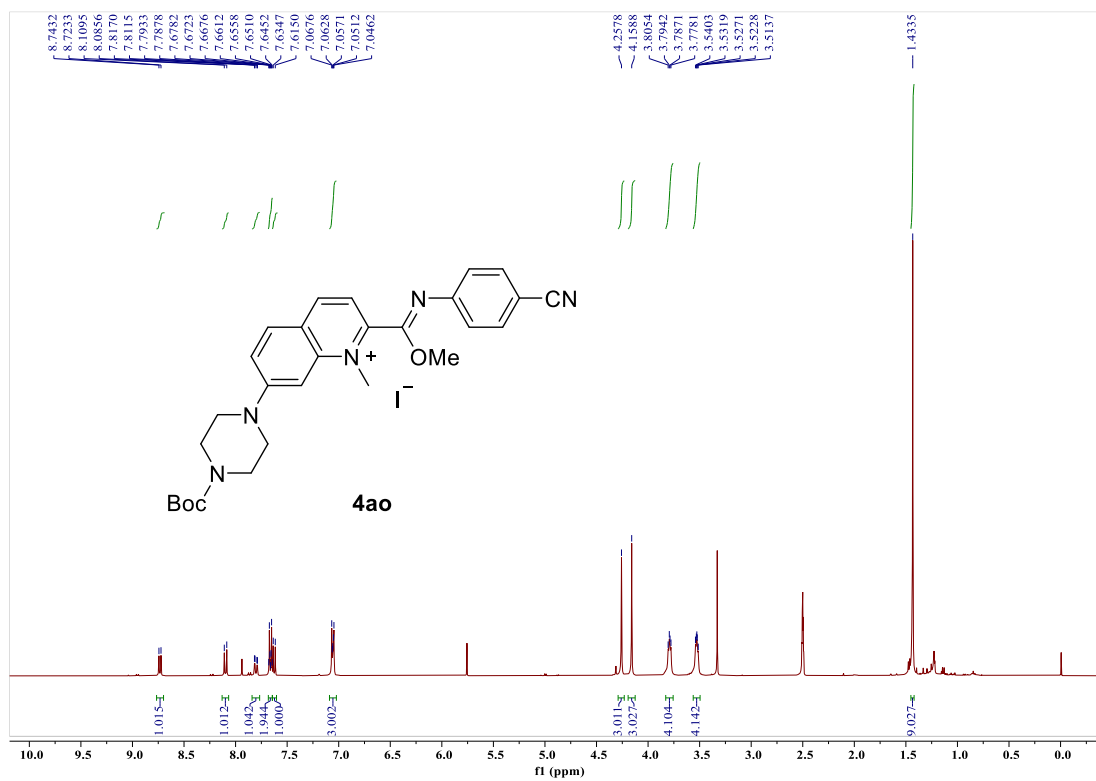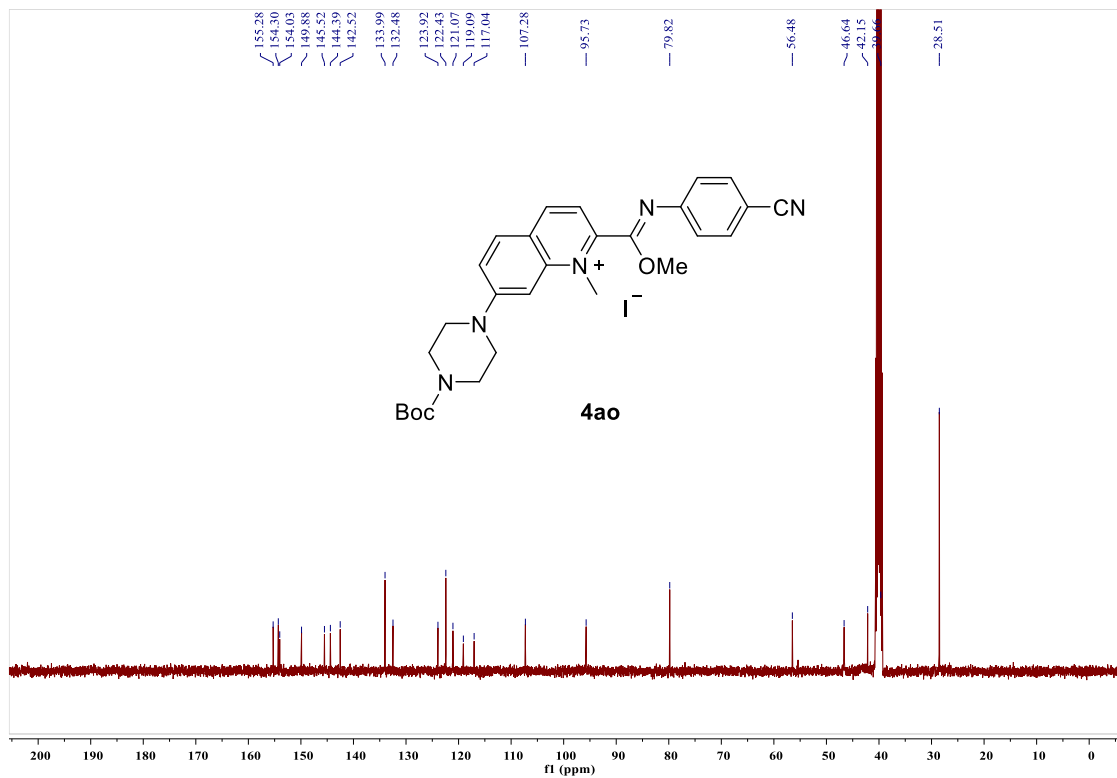

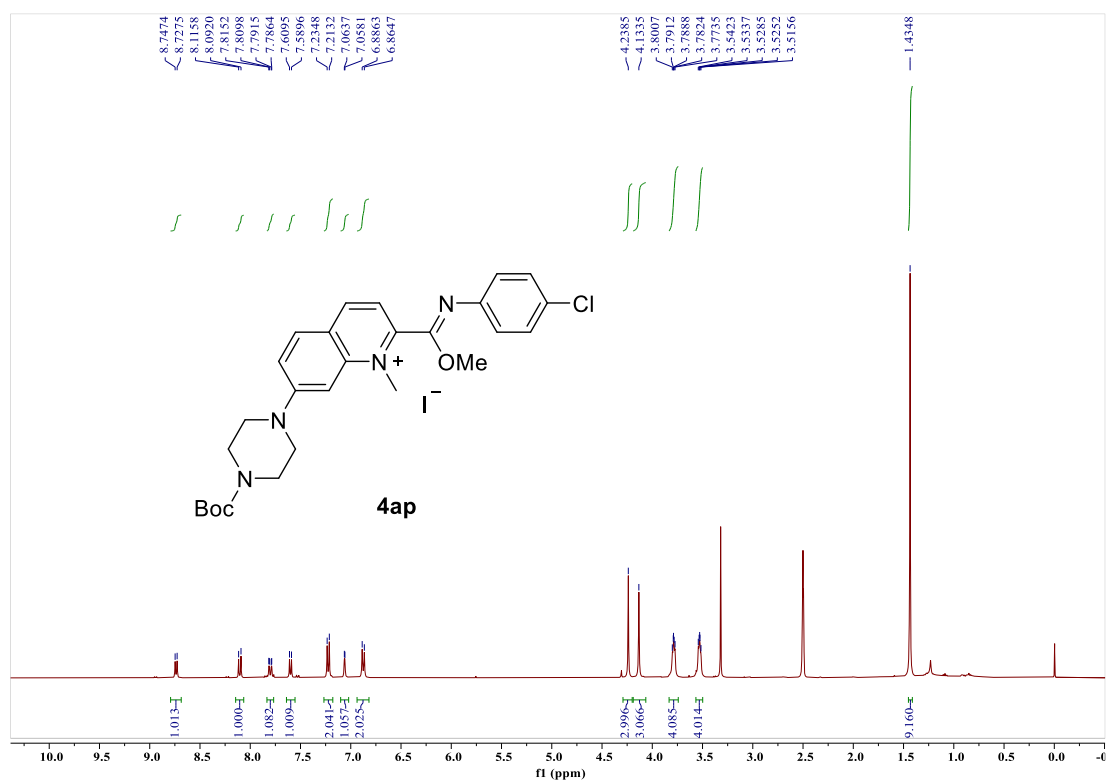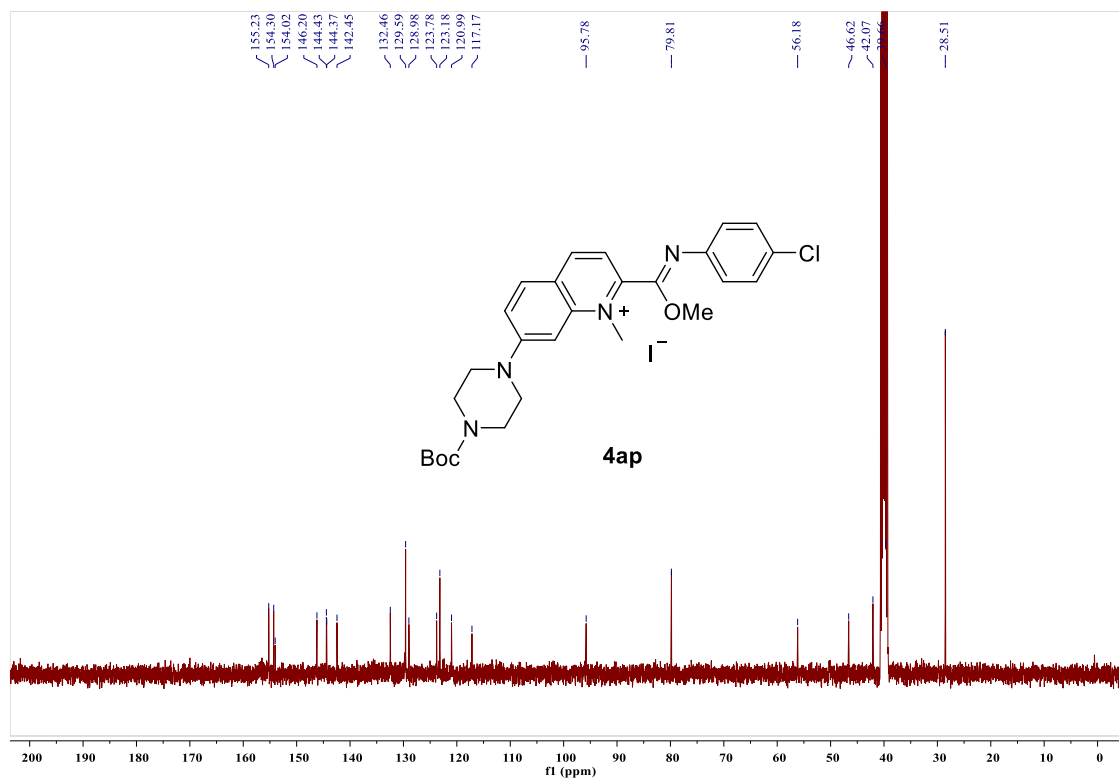

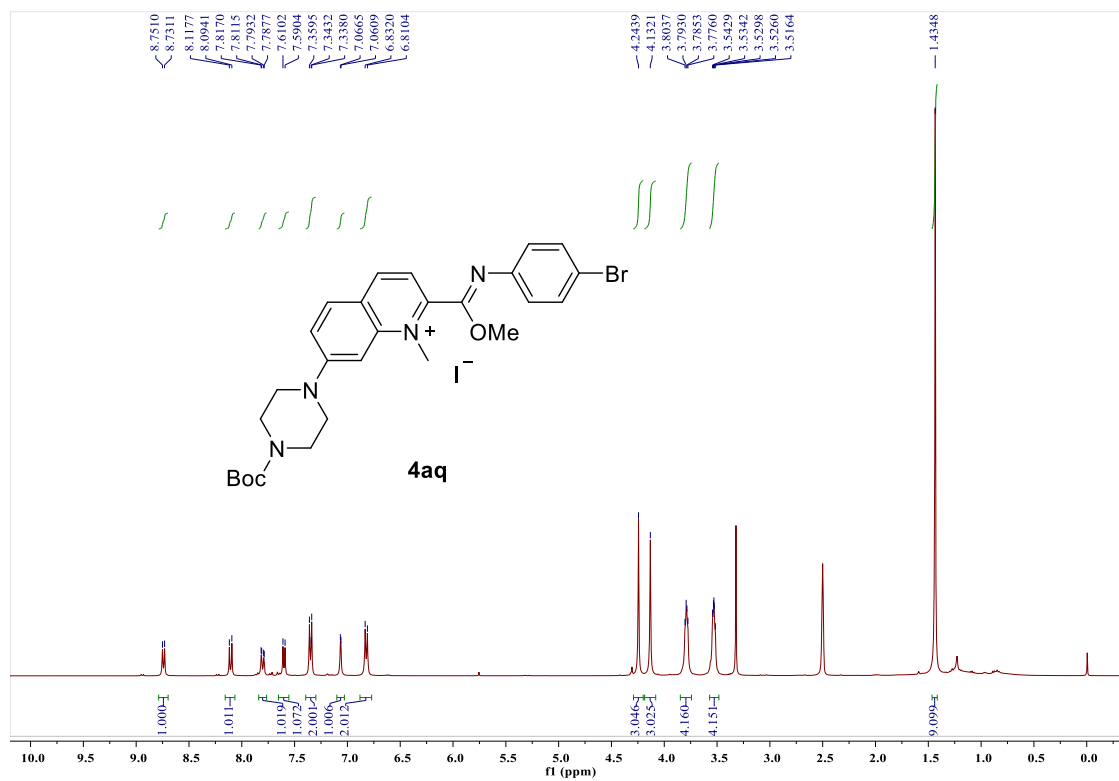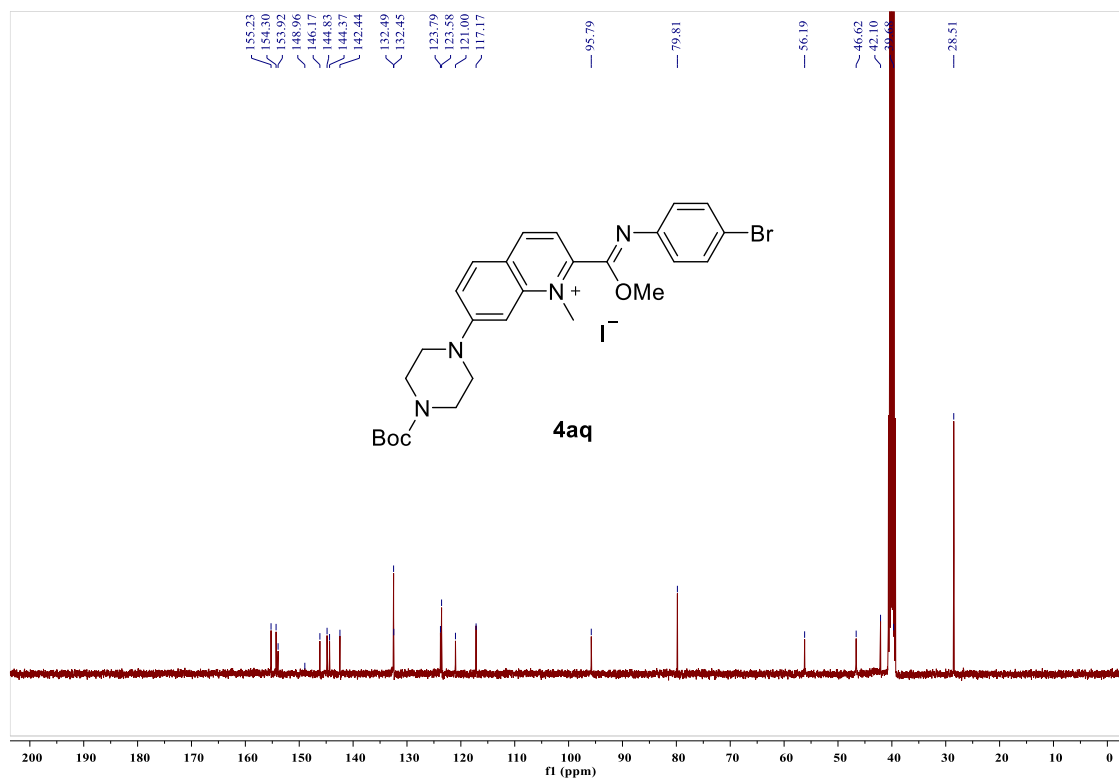

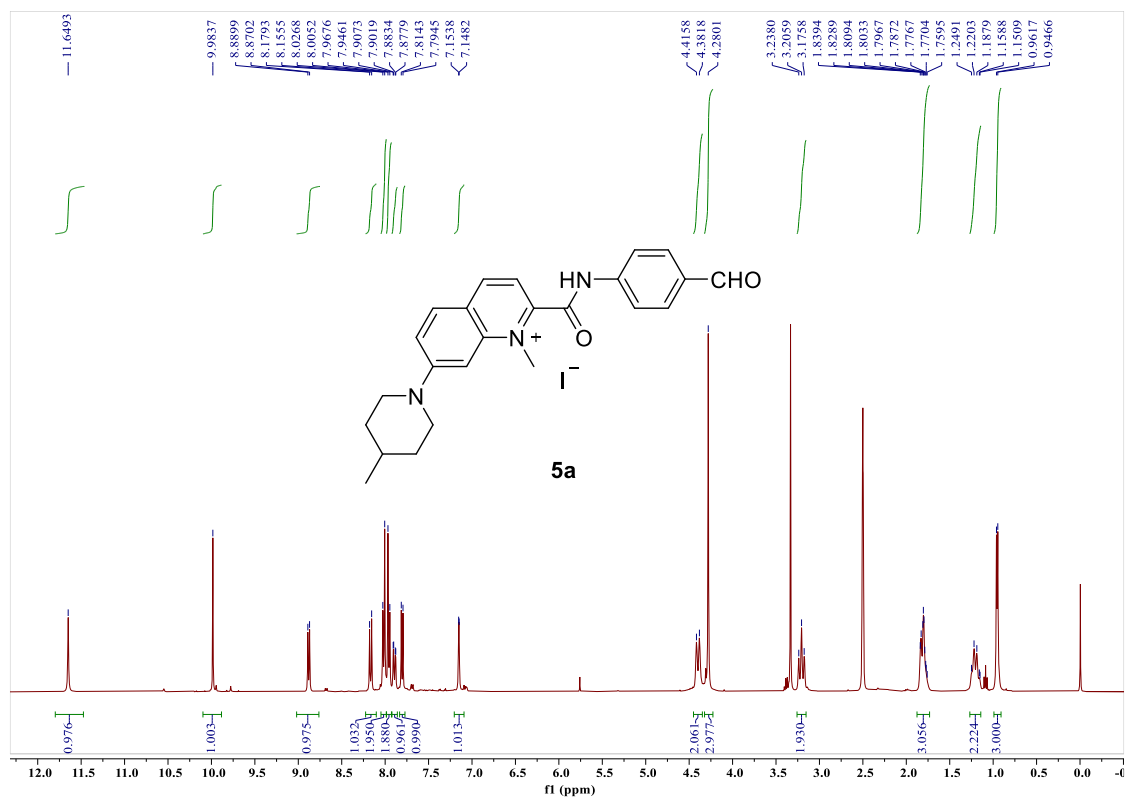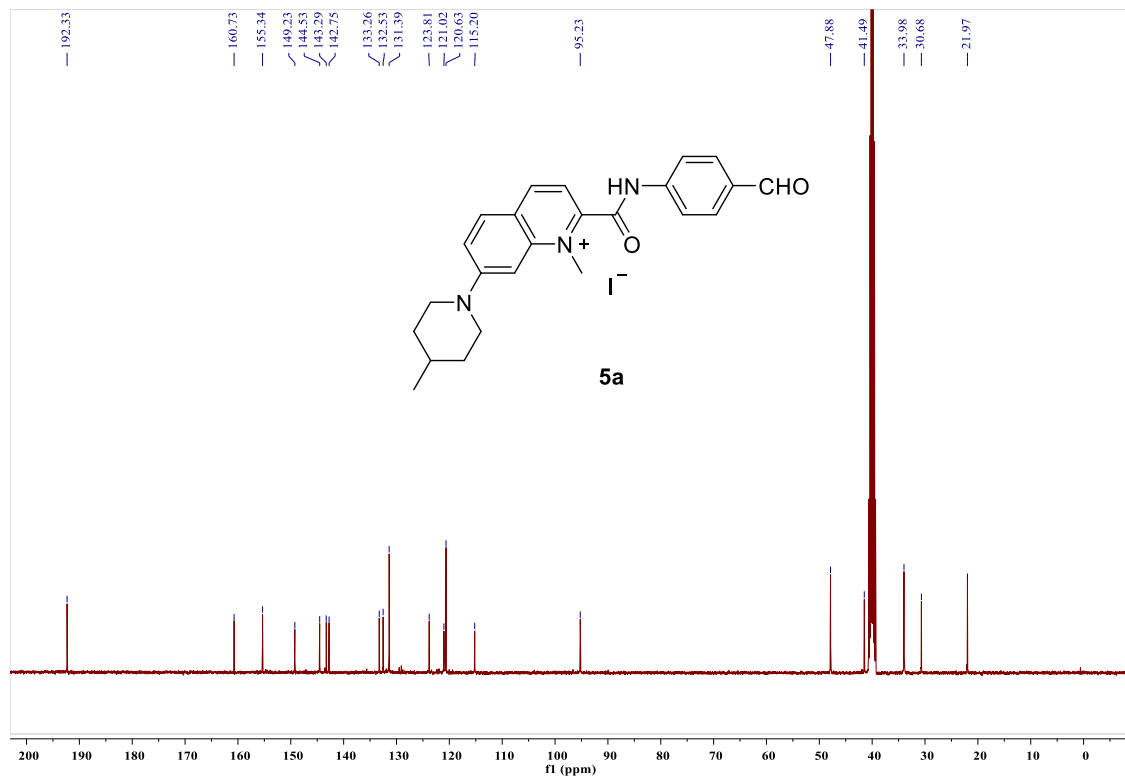

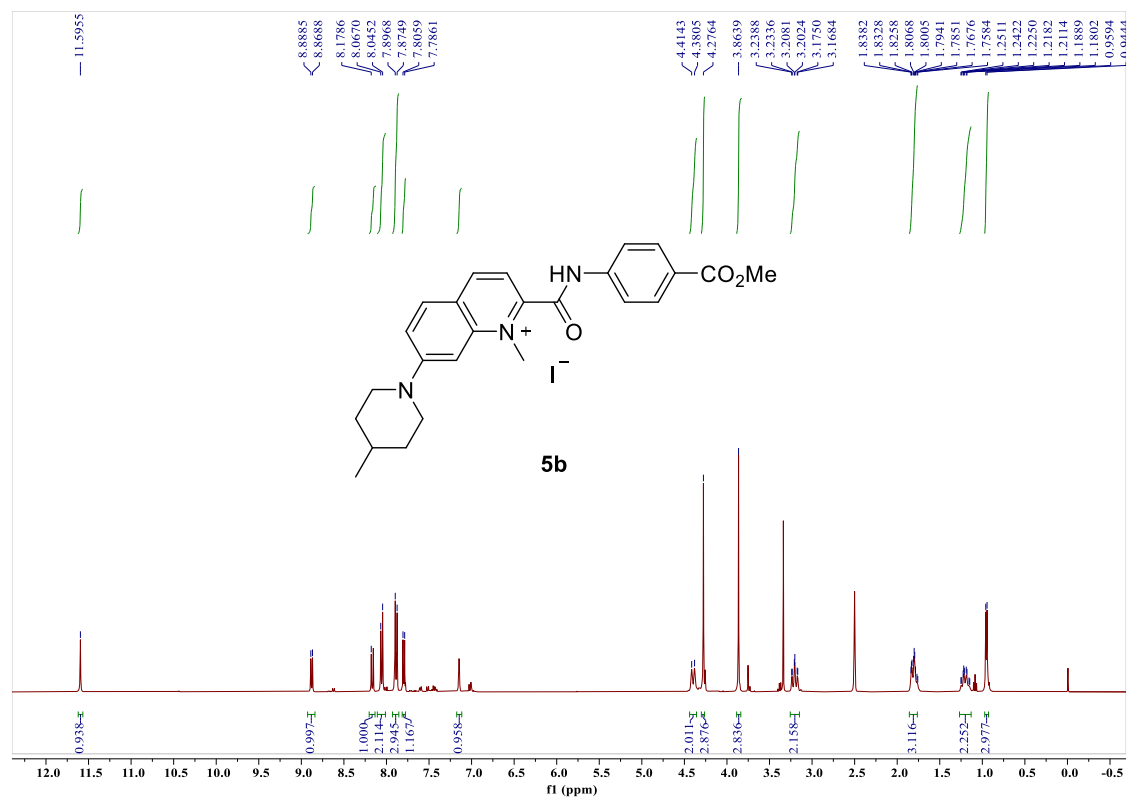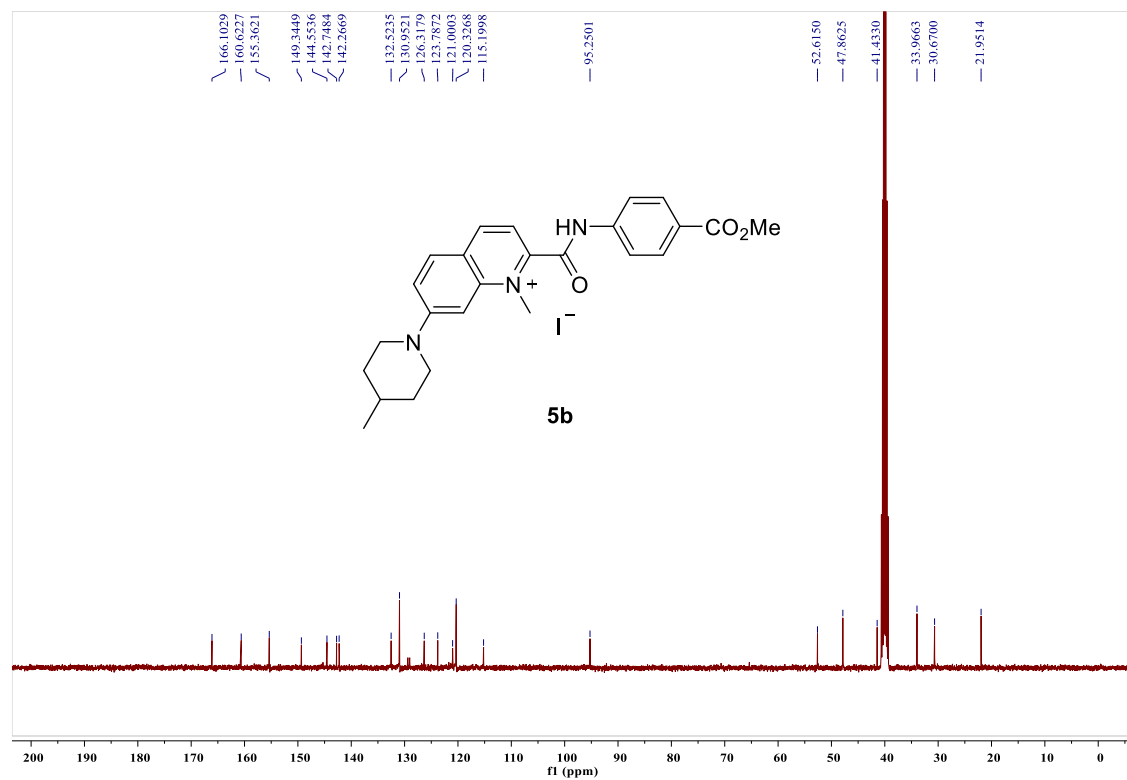

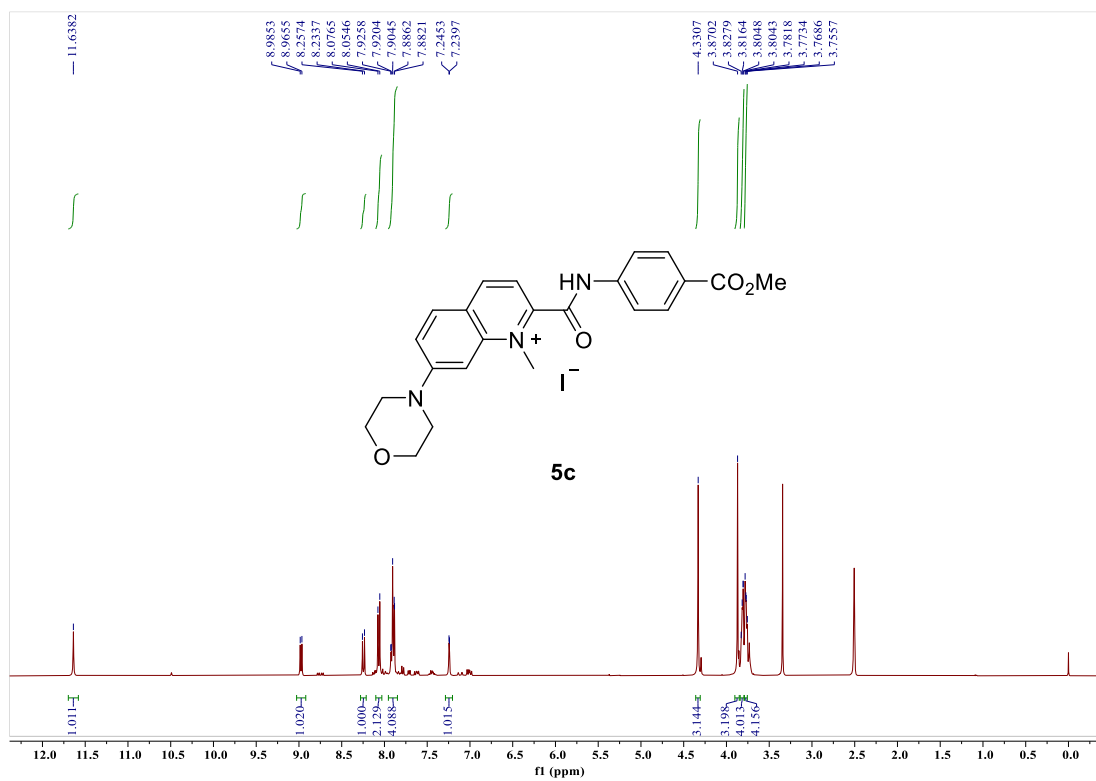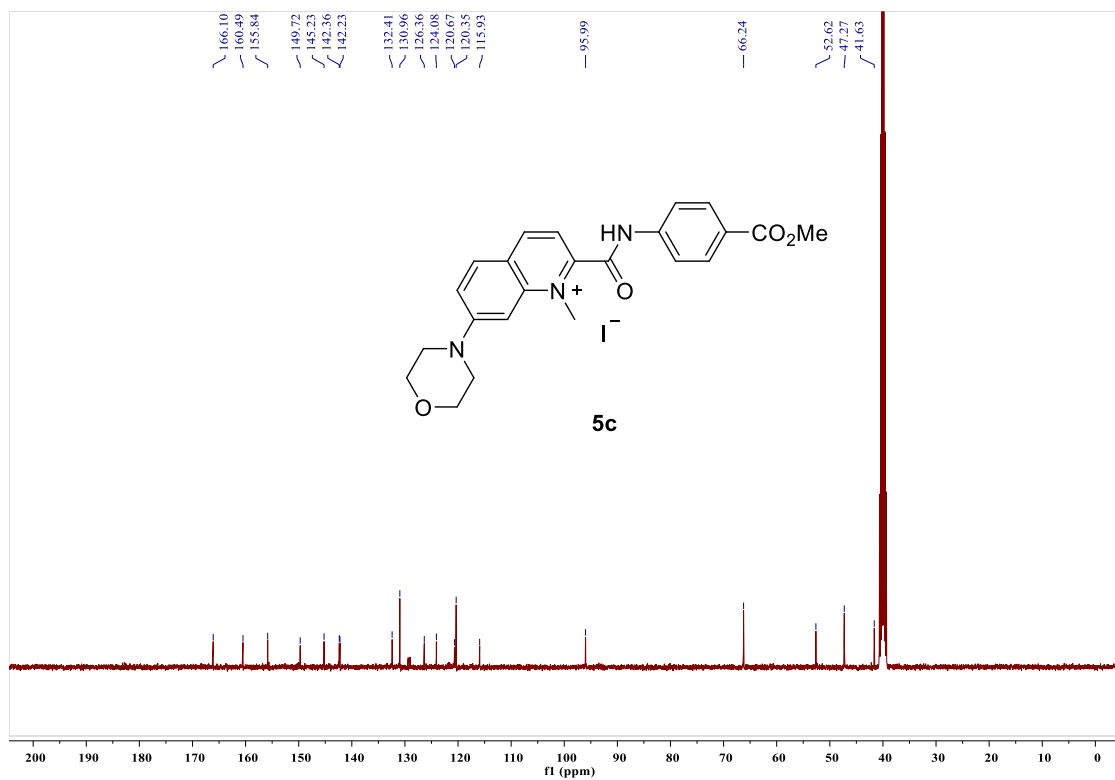



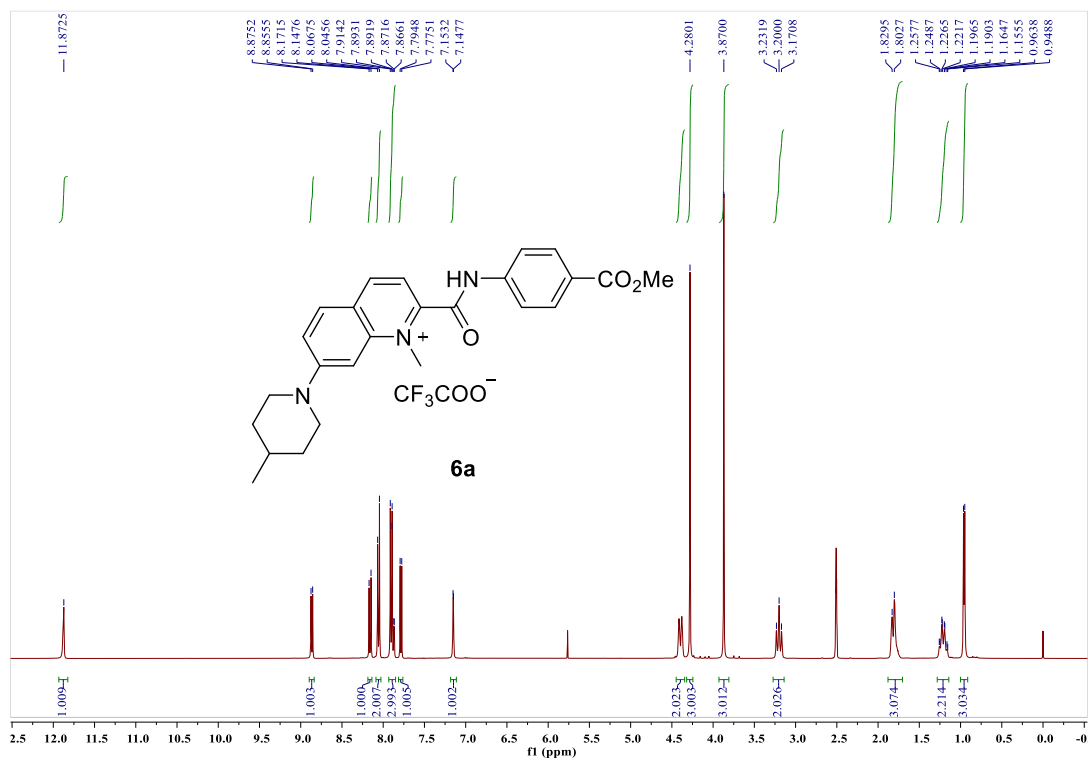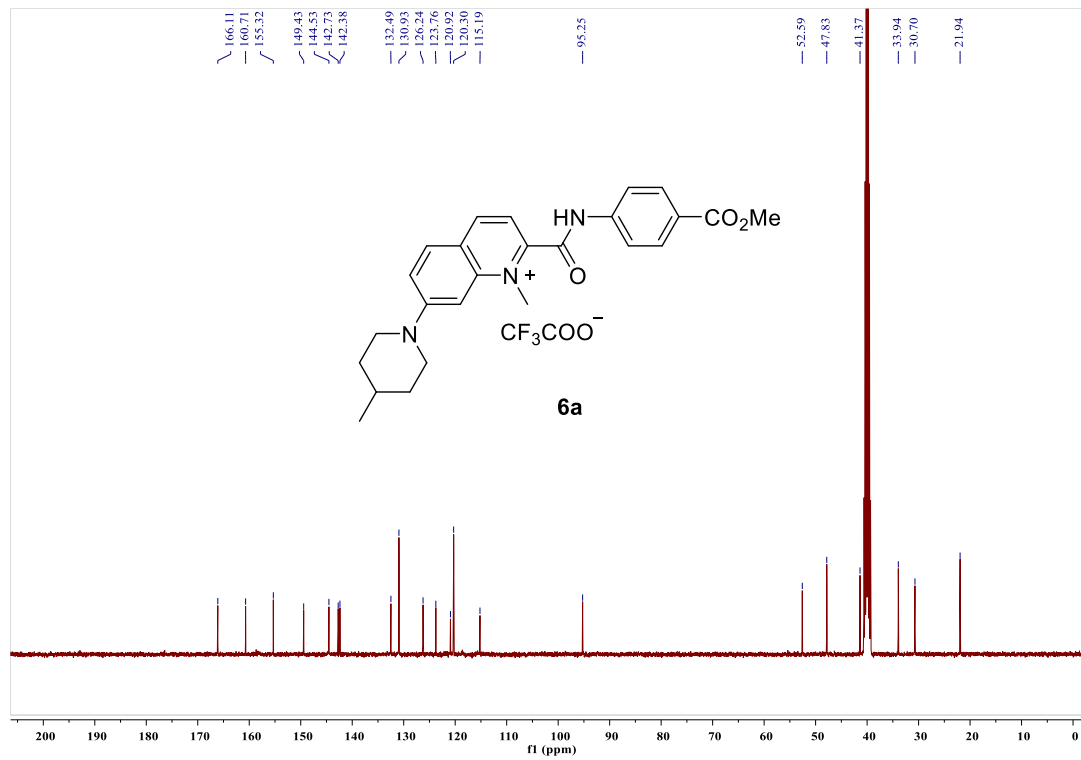

Supplement: d4qo01628a1.pdf [file d4qo01628a1.pdf]
